# Supplementary material for: Composition of fish egg assemblages varies with depth on the West Florida Shelf
Source: PeerJ. 2026 Jan 22;14:e20498. doi: 10.7717/peerj.20498 (PMC12832055; doi:10.7717/peerj.20498)
Supplement: Supplemental Information 1 [file peerj-14-20498-s001.xlsx]

## Sheet: Supplemental Table 1
Supplemental Table 1: Detailed information for each fish taxon recovered in this study.
Species	Family	Common Name	Habitat (from Fishbase)	# stations detected at	total # eggs	# distinct depth bins detected				found at surface of any sample?
Ariomma bondi	Ariommatidae	Silver-rag driftfish	demersal	3	56	4				Y
Baldwinella aureorubens	Serranidae	Streamer bass	demersal	1	7	1
Baldwinella vivanus	Serranidae	Red barbier	benthopelagic	1	1	1
Bellator brachychir	Triglidae	Shortfin searobin	demersal	1	2	2
Bellator egretta	Triglidae	Streamer searobin	demersal	2	4	3
Brama brama	Bramidae	Atlantic pomfret	pelagic-neritic	1	1	1
Caraibops trispinosus	Synagropidae	Threespine bass	bathydemersal	3	14	3
Caulolatilus cyanops	Malacanthidae	Blackline tilefish	demersal	2	41	6				Y
Caulolatilus microps	Malacanthidae	Grey tilefish	demersal	1	3	2
Chauliodus sloani	Stomiidae	Sloane's viperfish	bathypelagic	1	22	5				Y
Chauliodus sp.	Stomiidae	Viperfish	n/a	1	6	3
Citharichthys cornutus	Paralichthyidae	Horned whiff	bathydemersal	2	12	2
Decapterus macarellus	Carangidae	Mackerel scad	pelagic-oceanic	1	11	2				Y
Decodon puellaris	Labridae	Red hogfish	reef-associated	1	1	1
Diplospinus multistriatus	Gempylidae	Striped escolar	benthopelagic/demersal	1	2	2				Y
Etrumeus sadina	Dussumieriidae	Red-eye round herring	pelagic-neritic	2	3	3				Y
Hemanthias leptus	Serranidae	Longtail bass	demersal	1	1	1
Hoplunnis diomediana	Nettastomatidae	Blacktail pikeconger	demersal	1	1	1
Hoplunnis macrura	Nettastomatidae	Freckled pike-conger	demersal	1	1	1
Macroramphosus scolopax	Centriscidae	Longspine snipefish	demersal	1	5	2
Maurolicus weitzmani	Sternoptychidae	Atlantic pearlside	bathypelagic	3	143	6				Y
Merluccius albidus	Merlucciidae	Offshore silver hake	bathydemersal	1	1	1
Mullus auratus	Mullidae	Red goatfish	demersal	1	2	1
Mycteroperca microlepis	Serranidae	Gag	reef-associated	1	2	1
Mycteroperca phenax	Serranidae	Scamp	reef-associated	1	2	2				Y
Nealotus tripes	Gempylidae	Black snake mackerel	bathypelagic	1	2	2
Pagrus pagrus	Sparidae	Red porgy	benthopelagic/demersal	2	9	4
Polyipnus clarus	Sternoptychidae	Slope hatchetfish	bathydemersal	1	1	1
Priacanthus arenatus	Priacanthidae	Atlantic bigeye	reef-associated	1	1	1				Y
Prionotus alatus	Triglidae	Spiny searobin	demersal	1	6	2				Y
Prionotus paralatus	Triglidae	Mexican searobin	demersal	1	1	1
Prionotus roseus	Triglidae	Bluespotted searobin	demersal	1	2	2
Prionotus stearnsi	Triglidae	Shortwing searobin	demersal	3	11	3				Y
Saurida brasiliensis	Synodontidae	Brazilian lizardfish	demersal	3	42	6				Y
Saurida normani	Synodontidae	Shortjaw lizardfish	reef-associated	1	14	4				Y
Scomber colias	Scombridae	Atlantic chub mackerel	pelagic-neritic	3	59	4				Y
Seriola zonata	Carangidae	Banded rudderfish	benthopelagic	1	1	1
Serranus notospilus	Serranidae	Saddle bass	reef-associated	2	38	4
Synodus intermedius	Synodontidae	Sand diver	reef-associated	1	2	1
Synodus poeyi	Synodontidae	Offshore lizardfish	reef-associated	2	47	4
Taractichthys sp.	Bramidae	Big-scale pomfret	pelagic-oceanic	1	1	1				Y
Trachipterus sp.	Trachipteridae	Ribbonfish/Dealfish/Sculpin	n/a	1	1	1				Y
Trachurus lathami	Carangidae	Rough scad	reef-associated	2	13	4				Y
Vinciguerria nimbaria	Phosichthyidae	Oceanic lightfish	bathypelagic	1	28	5				Y
