# Supplementary material for: Composition of fish egg assemblages varies with depth on the West Florida Shelf
Source: PeerJ. 2026 Jan 22;14:e20498. doi: 10.7717/peerj.20498 (PMC12832055; doi:10.7717/peerj.20498)
Supplement: Supplemental Information 2 — Data from MOCNESS fish egg survey, including sequence_name, sample_name, organism isolation_source, collection_date, collection_time, collection_depth, latitude, longitude, station number, geographic location name, sample collection device description, number of fish eggs, processed sequence [file peerj-14-20498-s002.xlsx]

## Sheet: Sheet1
sequence_name	*sample_name	*organism	isolation_source	*collection_date	*collection_time	*collection_depth	*lat	*long	*station number	*geo_loc_name	samp_collect_device	description	number of fish eggs processed	sequence
1	St582-3	Vinciguerria nimbaria	Seawater	2012-02-16	01:49:00	80-99	28.9963	-87.5155	58	USA: Gulf of Mexico	Multiple Opening/Closing Net Environmental Sensing Sytem (MOCNESS)	Fish eggs identified to mitochondrial barcoding gene (COI).	1	AAAACTGAGCCGGCCCGGGGCTCTCCTTGGTGAAGACCAAATTTATAATGTAATCGTCACTGCGCACGCTTTCGTGATGATTTTCTTCATAGTAATACCTCTAATAATCGGAGGCTTCGGCAACTGGCTGATCCCCCTAATGATTGGGGCCCCCGACATGGCTTTCCCCCGAATGAACAATATGAGTTTCTGACTCCTCCCCCCTTCCTTCCTTCTCCTCTTGGCATCATCAGGTGTTGAGGCAGGAGCCGGAACAGGGTGAACTGTCTACCCCCCTTTGGCAGGCAATCTCGCGCATGCGGGAGCCTCAGTAAACCTAACCATCTTTTCGCTTCACTTAGCGGGCATCTCATCTATTCTAGGGGCCATCAACTTTATTACGACTATTATCAATATGAA…
2	St582-6	Chauliodus sloani	Seawater	2012-02-16	01:49:00	80-99	28.9963	-87.5155	58	USA: Gulf of Mexico	Multiple Opening/Closing Net Environmental Sensing Sytem (MOCNESS)	Fish eggs identified to mitochondrial barcoding gene (COI).	1	CGCCTTCATGGGTGACGATCAAATTTACAACGTAATCGTCACAGCACATGCCTTCGTAATAATTTTCTTTATGGTTATGCCAATCATGATCGGGGGTTTCGGAAACTGATTAGTCCCCCTGATGATCGGAGCCCCTGATATGGCCTTCCCGCGAATAAACAACATGAGCTTCTGGCTACTCCCACCCTCCTTTCTTCTTCTACTTGCCTCTTCTGGGGTAGAAGCCGGGGCCGGGACTGGATGAACTGTATACCCGCCCCTTTCAGGGAACCTCGCCCACGCTGGCGCCTCCCTGGACCTTACAATTTTCTCCCTCCACCTGGCAGGGATCTCCTCTATTCTTGGAGCAATTAACTTCATTACAACCATCTACAACATGAAGCCCGCCGGCATGTCTCA…
3	St582-35	Vinciguerria nimbaria	Seawater	2012-02-16	01:49:00	80-99	28.9963	-87.5155	58	USA: Gulf of Mexico	Multiple Opening/Closing Net Environmental Sensing Sytem (MOCNESS)	Fish eggs identified to mitochondrial barcoding gene (COI).	1	GGTGATGACCAAATTTATAATGTAATCGTCACCGCGCACGCTTTCGTGATGATTTTCTTCATAGTAATACCTCTAATAATTGGAGGCTTCGGCAACTGGCTGATCCCCCTAATGATTGGGGCCCCCGACATGGCTTTCCCCCGAATGAACAATATGAGTTTCTGACTCCTCCCCCCTTCCTTCCTTCTCCTCTTGGCATCATCAGGTGTTGAGGCAGGAGCCGGAACAGGGTGAACTGTCTACCCCCCTTTGGCAGGCAATCTCGCGCATGCGGGAGCCTCAGTAGACCTAACCATCTTTTCGCTTCATTTAGCGGGCATCTCATCTATTCTAGGGGCCATCAACTTTATTACGACTATTATCAATATGAAGCCTCCTGCAATTTCTCAGTACCAGACC…
4	St582-43	Vinciguerria nimbaria	Seawater	2012-02-16	01:49:00	80-99	28.9963	-87.5155	58	USA: Gulf of Mexico	Multiple Opening/Closing Net Environmental Sensing Sytem (MOCNESS)	Fish eggs identified to mitochondrial barcoding gene (COI).	1	GCGCACGCTTTCTTGATGATTTTCTTCATAGTAATACCTCTAATAATTGGAGGCTTCGGCAACTGGCTGATCCCCCTAATGATTGGGGCCCCCGACATGGCTTTCCCCCGAATGAACAATATGAGTTTCTTACTCCTCCCCCCTTCCTTCTTTCTCCTCTTGGCATCATCAGGTGTTGAGGCAGGAGCCGGAACAGGGTGAACTGTCTACCCCCCTTTGGCTGGCAGTCTCGCGCATGCGGGAGCCTCAGTAG
5	St582_Contig_2	Vinciguerria nimbaria	Seawater	2012-02-16	01:49:00	80-99	28.9963	-87.5155	58	USA: Gulf of Mexico	Multiple Opening/Closing Net Environmental Sensing Sytem (MOCNESS)	Fish eggs identified to mitochondrial barcoding gene (COI).	2	TGGTGATGACCAAATTTATAATGTAATCGTCACTGCGCACGCTTTCGTGATGATTTTCTTCATAGTAATACCTCTAATAATCGGAGGCTTCGGCAACTGGCTGATCCCCCTAATGATTGGGGCCCCCGACATGGCTTTCCCCCGAATGAACAATATGAGTTTCTGACTCCTCCCCCCTTCCTTCCTTCTCCTCTTGGCATCATCAGGTGTTGAGGCAGGAGCCGGAACAGGGTGAACTGTCTACCCCCCTTTGGCAGGCAATCTCGCGCATGCGGGAGCCTCAGTAGACCTAACCATCTTTTCGCTTCATTTAGCGGGCATCTCATCTATTCTAGGGGCCATCAACTTTATTACGACTATTATCAATATGAAGCCTCCTGCAATTTCTCAGTACCAGAC…
6	St582_Contig_3	Chauliodus sp.	Seawater	2012-02-16	01:49:00	80-99	28.9963	-87.5155	58	USA: Gulf of Mexico	Multiple Opening/Closing Net Environmental Sensing Sytem (MOCNESS)	Fish eggs identified to mitochondrial barcoding gene (COI).	2	CCGGCGCCTTCATAGGCGACGACCAAATTTATAATGTCATCGTCACAGCACATGCCTTCGTAATAATTTTCTTTATGGTGATGCCCATCATGATCGGGGGCTTCGGAAACTGACTAGTGCCCCTAATGATCGGGGCCCCAGATATAGCCTTCCCCCGAATAAACAACATGAGCTTCTGGCTCCTCCCTCCCTCATTTCTTCTTCTGCTCGCCTCTTCTGGGGTTGAAGCTGGGGCCGGAACCGGGTGAACTGTATACCCACCCCTCTCAGGAAACCTTGCCCACGCTGGTGCCTCCGTCGACCTCACAATTTTCTCCCTCCACCTAGCAGGGATTTCTTCTATTCTGGGGGCAATTAATTTCATCACCACAATTTATAACATGAAGCCTGCCGGCATGT…
7	St583-3	Vinciguerria nimbaria	Seawater	2012-02-16	01:57:00	59-80	28.9963	-87.5155	58	USA: Gulf of Mexico	Multiple Opening/Closing Net Environmental Sensing Sytem (MOCNESS)	Fish eggs identified to mitochondrial barcoding gene (COI).	1	ATTTATAATGGAATCGTCACTGCGCACGCTTTCGTGATGATTTTCTTCATAGTAATACCTCTAATAATCGGAGGCTTCGGCAACTGGCTGATCCCCCTAATGATTGGGGCCCCCGACATGGCTTTCCCCCGAATGAACAATATGAGTTTCTGACTCCTCCCCCCTTCCTTCCTTCTCCTCTTGGCATCATCAGGTGTTGAGGCAGGAGCCGGAACAGGGTGAACTGTCTACCCCCCTTTGGCAGGGAATCTCGCGCATGCGGGAGCCTCAATAAACCTAACCATCTTTTCGCTTCATTTAGCGGGCATCTCATCTATTCTAGGGGGCATCAACTTTATTACGACTATTATCAATATGAAGCCTCCTGCAATTTCTCAGTACCAGACCCCCCTATTTGTC…
8	St583-6	Chauliodus sp.	Seawater	2012-02-16	01:57:00	59-80	28.9963	-87.5155	58	USA: Gulf of Mexico	Multiple Opening/Closing Net Environmental Sensing Sytem (MOCNESS)	Fish eggs identified to mitochondrial barcoding gene (COI).	1	TTTTTTAAAAAAAACAGCCACCCGGTTCCTTCATAGGCGACGACCAAATTTATAATGTCATCGTCACAGCACATGCCTTCGTAATAATTTTCTTTATGGTGATGCCCATCATGATCGGGGGCTTCGGAAACTGACTAGTGCCCCTAATGATCGGGGCCCCAGATATAGCCTTCCCCCGAATAAACAACATGAGCTTCTGGCTCCTCCCTCCCTCATTTCTTCTTCTGCTCGCCTCTTCTGGGGTTGAAGCTGGGGCCGGAACCGGGTGAACTGTATACCCACCCCTCTCAGGAAACCTTGCCCACGCTGGTGCCTCCGTCGACCTCACAATTTTCTCCCTCCACCTAGCAGGGATTTCTTCTATTCTGGGGGCAATTAATTTCATCACCACAATTTATA…
9	St583-10	Chauliodus sp.	Seawater	2012-02-16	01:57:00	59-80	28.9963	-87.5155	58	USA: Gulf of Mexico	Multiple Opening/Closing Net Environmental Sensing Sytem (MOCNESS)	Fish eggs identified to mitochondrial barcoding gene (COI).	1	GTTTATTCGAGCAGAGCTCAGCCAACCCGGCGCCTTCATAGGCGACGACCAAATTTATAATGTCATCGTCACAGCACATGCCTTCGTAATAATTTTCTTTATGGTGATGCCCATCATGATCGGGGGCTTCGGAAACTGACTAGTGCCCCTAATGATCGGGGCCCCAGATATAGCCTTCCCCCGAATAAACAACATGAGCTTCTGGCTCCTCCCTCCCTCATTTCTTCTTCTGCTCGCCTCTTCTGGGGTTGAAGCTGGGGCCGGAACCGGGTGAACTGTATACCCGCCCCTCTCAGGAAACCTTGCCCACGCTGGTGCCTCCGTCGACCTCACAATTTTCTCCCTCCACCTAGCAGGGATTTCTTCTATTCTGGGGGCAATTAATTTCATCACCACAAT…
10	St583-13	Nealotus tripes	Seawater	2012-02-16	01:57:00	59-80	28.9963	-87.5155	58	USA: Gulf of Mexico	Multiple Opening/Closing Net Environmental Sensing Sytem (MOCNESS)	Fish eggs identified to mitochondrial barcoding gene (COI).	1	TTTATAATGTAATCGTCACGGCACACGCCTTCGTAATAATTTTCTTTATAGTAATACCAATCATGATTGGAGGGTTCGGAAACTGACTTATCCCTCTTATGATTGGGGCACCAGACATGGCCTTCCCCCGAATGAACAAAATGAGCTTCTGGCTTCTGCCCCCTTCATTCCTTCTACTTCTAGCCTCTTCAGGGGTTGAATCCGGAGCTGGAACTGGCTGAACCGTCTACCCTCCTTTAGCTAGCAACCTGGCCCATGCAGGGGCTTCCGTTGACCTTACTATCTTCTCTCTCCACTTAACAGGGATTTCCTCAATTCTTGGGGCCATTAATTTTTTTTCAACAATTATTAACATGAAGCCCGCAGCAATCTCACAATACCAAACACCCCTATTTGTGT…
11	St583-14	Vinciguerria nimbaria	Seawater	2012-02-16	01:57:00	59-80	28.9963	-87.5155	58	USA: Gulf of Mexico	Multiple Opening/Closing Net Environmental Sensing Sytem (MOCNESS)	Fish eggs identified to mitochondrial barcoding gene (COI).	1	AAAAGGGCCCCCTTTTTAAAAAAAAAATGAAACCAATTTATAATGTAATCGTCACTGCGCACGCTTTCGTGATGATTTTCTTCATAGTAATACCTCTAATAATTGGAGGCTTCGGCAACTGGCTGATCCCCCTAATGATTGGGGCCCCCGACATGGCTTTCCCCCGAATGAACAATATGAGTTTCTGACTCCTCCCCCCTTCCTTCCTTCTCCTCTTGGCATCATCAGGTGTTGAGGCAGGAGCCGGAACAGGGTGAACTGTCTACCCCCCTTTGGCAGGCAATCTCGCGCATGCGGGAGCCTCAATAAACCTAACCATCTTTTCTCTTCATTTAGCGGGGATCTCATCTATTCTAGGGGGCATCATCTTTATTACGACTATTATCAATATGAAGCCTC…
12	St583-28	Vinciguerria nimbaria	Seawater	2012-02-16	01:57:00	59-80	28.9963	-87.5155	58	USA: Gulf of Mexico	Multiple Opening/Closing Net Environmental Sensing Sytem (MOCNESS)	Fish eggs identified to mitochondrial barcoding gene (COI).	1	TGGTGATGACCAAATTTATAATGTAATCGTCACTGCGCACGCTTTCGTGATGATTTTCTTCATAGTAATACCTCTAATAATTGGAGGCTTCGGCAACTGGCTGATCCCCCTAATGATTGGGGCCCCCGACATGGCTTTCCCCCGAATGAACAATATGAGTTTCTGACTCCTCCCCCCTTCCTTCCTTCTCCTCTTGGCATCATCAGGTGTTGAGGCAGGAGCCGGAACAGGGTGAACTGTCTACCCCCCTTTGGCAGGCAATCTCGCGCATGCGGGAGCCTCAGTAGACCTAACCATCTTTTCGCTTCATTTTGCGGGCATCTCAT
13	St583-29	Diplospinus multistriatus	Seawater	2012-02-16	01:57:00	59-80	28.9963	-87.5155	58	USA: Gulf of Mexico	Multiple Opening/Closing Net Environmental Sensing Sytem (MOCNESS)	Fish eggs identified to mitochondrial barcoding gene (COI).	1	GGAGATGACCAGATCTATAACGTAATCGTTACAGCACATGCCTTCGTAATGATTTTCTTTATAGTAATGCCCATTATGATCGGAGGGTTCGGAAACTGATTAATTCCCCTAATGATCGGGGCCCCCGATATGGCTTTCCCCCGTATAAACAATATGAGCTTTTGACTCCTCCCCCCCTCGTTCCTTCTTCTGCTAGCTTCTTCAGGAGTTGAATCTGGGGCCGGAACAGGATGAACAGTTTATCCGCCTCTCGCAGGCAACTTAACCCACGCAGGCGCATCCCTAAACTTAACCATTTTTTCTCTACACTTGGCAGGGATCTCCTCAATTCTTGGGGCAATTAACTTCATCACTACCATTATTAACATAAAACCTGCCGCCATCTCGCAGTACCAAACC…
14	St583-39	Vinciguerria nimbaria	Seawater	2012-02-16	01:57:00	59-80	28.9963	-87.5155	58	USA: Gulf of Mexico	Multiple Opening/Closing Net Environmental Sensing Sytem (MOCNESS)	Fish eggs identified to mitochondrial barcoding gene (COI).	1	TCTTCATAGTAATACCTCTAATAATCGGAGGCTTCGGCAACTGGCTGATCCCCCTAATGATTGGGGCCCCCGACATGGCTTTCCCCCGAA
15	St583-41	Vinciguerria nimbaria	Seawater	2012-02-16	01:57:00	59-80	28.9963	-87.5155	58	USA: Gulf of Mexico	Multiple Opening/Closing Net Environmental Sensing Sytem (MOCNESS)	Fish eggs identified to mitochondrial barcoding gene (COI).	1	AAATTTAAATGTAATCGTCACTGCCCCCGCTTTCGTGATGATTTTCTTCATAGAAATACCTCTAATAATCGGAGGCTTCGGCAACTGGCTGATCCCCCTAATGATTGGGGCCCCCGACATGGCTTTCCCCCGAATGAACAATATGAGTTTCTGACTCCTCCCCCCTTCCTTCCTTCTCCTCTTGGCATCATCAGGTGTTGAGGCAGGAGCCGGAACAGGGTGAACTGTCTACCC
16	St583_Contig_2	Chauliodus sloani	Seawater	2012-02-16	01:57:00	59-80	28.9963	-87.5155	58	USA: Gulf of Mexico	Multiple Opening/Closing Net Environmental Sensing Sytem (MOCNESS)	Fish eggs identified to mitochondrial barcoding gene (COI).	3	GTAATTCGAGCAGAGCTCAGCCMACCCGGCGCCTTCATGGGCGACGACCAAATTTATAATGTCATCGTCACAGCACATGCCTTCGTAATAATTTTCTTTATGGTGATGCCCATCATGATCGGGGGTTTCGGAAACTGACTAGTGCCCCTAATGATCGGGGCCCCAGATATAGCCTTCCCCCGAATAAACAACATGAGCTTCTGGCTCCTCCCTCCCTCATTTCTTCTTCTGCTCGCCTCTTCTGGGGTTGAAGCTGGGGCCGGAACCGGGTGAACTGTATACCCACCCCTCTCAGGAAACCTTGCCCACGCTGGTGCCTCCGTCGACCTCACAATTTTCTCCCTCCACCTAGCAGGRATTTCTTCTATTCTGGGGGCAATTAATTTCATCACCACAATT…
17	St584-2	Chauliodus sp.	Seawater	2012-02-16	02:03:00	38-59	28.9963	-87.5155	58	USA: Gulf of Mexico	Multiple Opening/Closing Net Environmental Sensing Sytem (MOCNESS)	Fish eggs identified to mitochondrial barcoding gene (COI).	1	CGGCGCCTTCATAGGCGACGATCAAATTTATAATGTCATCGTCACAGCACATGCCTTCGTAATAATTTTCTTTATGGTGATGCCCATCATGATCGGGGGCTTCGGAAACTGACTAGTGCCCCTAATGATCGGGGCCCCAGATATAGCCTTCCCCCGAATAAACAACATGAGCTTCTGGCTCCTCCCTCCCTCGTTTCTTCTTCTGCTCGCCTCTTCTGGGGTTGAAGCTGGGGCCGGAACCGGGTGAACTGTATACCCACCCCTCTCAGGAAACCTTGCCCACGCTGGTGCCTCCCTCGACCTCACAATTTTCTCCCTCCACCTAGCAAGGATTCTTTTATTCTGGGGGGCATTTATTTTCTCCCCCCCATTTTAAAAAAGAAA
18	St584-17	Chauliodus sp.	Seawater	2012-02-16	02:03:00	38-59	28.9963	-87.5155	58	USA: Gulf of Mexico	Multiple Opening/Closing Net Environmental Sensing Sytem (MOCNESS)	Fish eggs identified to mitochondrial barcoding gene (COI).	1	TAGGCGACGACCAAATTTATAATGTCATCGTCACAGCACATGCCTTCCTAATAATTTTCTTTATGGTGATGCCCATCAAGATCGGGGGCTTCGGAAACTGACTAGTGCCCCTAATGATCGGGGCCCCAGATATAGCCTTCCCCCGAATAAACAACATGAGCTTCTGGCTCCTCCCTCCCTCATTTCTTCTTCTGCTCGCCTCTTCTGGGGTTGAAGCTGGGGCCGGAACCGGGTGAACTGTATACCCCCCCCTCTCAAGAAACCTTGCCCACGCTGGTGCCTCCCTCCACCTCACAATTTTCTCCCTCCACCTAACAAGGATTTCTTCTATTCTGGGGGCAATTAATTTCATCACCACAATTTATAACATGAAGCCCGCCGGCATGTCTCAATATCAAG…
19	St584-20	Vinciguerria nimbaria	Seawater	2012-02-16	02:03:00	38-59	28.9963	-87.5155	58	USA: Gulf of Mexico	Multiple Opening/Closing Net Environmental Sensing Sytem (MOCNESS)	Fish eggs identified to mitochondrial barcoding gene (COI).	1	AAAAAAATGGTGATGACCAAATTTATAATGGAATCCTCACTGCGCACGCTTTCGTGATGATTTTCTTCATAATAATACCTCTAATAATCGGAGGCTTCGGCAACTGGCTGATCCCCCTAATGAATGGGGCCCCCCACATGGCTTTCCCCCGAATGAACAAAAAGAGTTTCTGACTCCTCCCCCCTTCCTTCCTTCTCCTCTTGGCATCATCAGGTGTTGAGGCAGGAGCCGGAACAGGGTGAACTGTCTACCCCCCTTTGGCAGGCAATCTCGCGCATGCGGGAGCCTCAATAAACCTAACCATCTTTTCGCTTCATTTAACGGGCATCTCATCTATTCTAGGGGCCATCAACTTTATTACGACTATTATCAATAAGAAGCCTCCTGCAATTTCTCAAT…
20	St584-25	Chauliodus sloani	Seawater	2012-02-16	02:03:00	38-59	28.9963	-87.5155	58	USA: Gulf of Mexico	Multiple Opening/Closing Net Environmental Sensing Sytem (MOCNESS)	Fish eggs identified to mitochondrial barcoding gene (COI).	1	AAAAAACAGCCCACCCGGCTCCTTCATGGGCGACGACCAAATTTATAATGTCATCGTCACAGCACATGCCTTCGTAATAATTTTCTTTATGGTGATGCCCATCATGATCGGGGGTTTCGGAAACTGACTAGTGCCCCTAATGATCGGGGCCCCAGATATAGCCTTCCCCCGAATAAACAACATGAGCTTCTGGCTCCTCCCTCCCTCATTTCTTCTTCTGCTCGCCTCTTCTGGGGTTGAAGCTGGGGCCGGAACCGGGTGAACTGTATACCCACCCCTCTCAGGAAACCTTGCCCACGCTGGTGCCTCCCTCGACCTCACAATTTTCTCCCTCCACCTAGCAAGGATTTCTTCTATTCTGGGGGCAATTAATTTCATCACCACAATTTATAACATGAA…
21	St584-27	Brama brama	Seawater	2012-02-16	02:03:00	38-59	28.9963	-87.5155	58	USA: Gulf of Mexico	Multiple Opening/Closing Net Environmental Sensing Sytem (MOCNESS)	Fish eggs identified to mitochondrial barcoding gene (COI).	1	CTTGGAGACGACCAAATCTATTATGTCATCGTTACAGCACATGCTTTCGTAATAATCTTCTTTATAGTAATACCAATCATAATCGGAGGATTCGGAAATTGACTTATCCCCCTAATGATCGGAGCCCCCGACATGGCATTCCCTCGAATGAATAACATAAGCTTTTGATTACTACCCCCTTCTTTTCTGTTACTCCTAGCCTCCTCCGGTGTTGAAGCTGGGGCCGGAACCGGCTGAACAGTCTACCCGCCCCTAGCTGGCAACCTTGCCCATGCCGGAGCATCTGTAGACCTTACCATCTTTTCTCTCCACCTAGCAGGAGTCTCCTCAATCCTAGGAGCCATCAACTTCATCACAACAATTATTAACATAAAACCCTCAGCCATCTCTCAATACCAG…
22	St584-45	Nealotus tripes	Seawater	2012-02-16	02:03:00	38-59	28.9963	-87.5155	58	USA: Gulf of Mexico	Multiple Opening/Closing Net Environmental Sensing Sytem (MOCNESS)	Fish eggs identified to mitochondrial barcoding gene (COI).	1	CAAACTAAGCCAACCTGGCGCCCTTTTAGGAGACGACCAGATTTATAATGTAATCGTCACGGCACACGCCTTCGTAATAATTTTCTTTATAGTAATACCAATCATGATTGGGGGGTTCGGAAACTGACTTATCCCTCTTATGATCGGGGCACCAGACATGGCCTTCCCCCGAATGAACAATATGAGCTTCTGGCTCCTACCCCCTTCATTCCTTCTACTTCTAGCCTCTTCAGGGGTTGAATCCGGAGCTGGAACTGGCTGAACCGTCTACCCCCCTTTAGCTAGCAACCTGGCCCATGCTGGGGCTTCCGTTGACCTTACCATCTTCTCTCTCCACTTAGCAGGGATTTCCTCAATTCTTGGGGCCATTAATTTTATTACAACAATTATTAACATGAA…
23	St585-42	Vinciguerria nimbaria	Seawater	2012-02-16	02:09:00	20-38	28.9963	-87.5155	58	USA: Gulf of Mexico	Multiple Opening/Closing Net Environmental Sensing Sytem (MOCNESS)	Fish eggs identified to mitochondrial barcoding gene (COI).	1	GCGCACGCTTTCGTGATGATTTTCTTCATAGGTAATACCTCTAATAATCGGAGGCTTCGGCAACTGGCTGATCCCCCTAAAGATTGGGGCCCCCGACATGGCTTTCCCCCCAATGAACAATATGAGTTTCTGACTCCCCCCCCCTTCCTTCCTTCTCCTCTTGGCATCATCAGGGGTTGAGGCAGGAGCCGGAACAGGGGGAACTGTCTAC
24	St585_Contig_1	Chauliodus sloani	Seawater	2012-02-16	02:09:00	20-38	28.9963	-87.5155	58	USA: Gulf of Mexico	Multiple Opening/Closing Net Environmental Sensing Sytem (MOCNESS)	Fish eggs identified to mitochondrial barcoding gene (COI).	13	CGGTGCTTGAGCCGGAATAGTTGGCACCGCAGTAAGCCTGTTAATTCGAGCAGAGCTCAGCCAACCCGGCGCCTTCATAGGCGACGACCAAATTTATAATGTCATCGTCACAGCACATGCCTTCGTAATAATTTTCTTTATGGTGATGCCCATCATGATCGGGGGCTTCGGAAACTGACTAGTGCCCCTAATGATCGGGGCCCCAGATATAGCCTTCCCCCGAATAAACAACATGAGCTTCTGGCTCCTCCCTCCCTCATTTCTTCTTCTGCTCGCCTCTTCTGGGGTTGAAGCTGGGGCCGGAACCGGGTGAACTGTATACCCACCCCTCTCAGGAAACCTTGCCCACGCTGGTGCCTCCGTCGACCTCACAATTTTCTCCCTCCACCTAGCAGGGAT…
25	St585_Contig_3	Vinciguerria nimbaria	Seawater	2012-02-16	02:09:00	20-38	28.9963	-87.5155	58	USA: Gulf of Mexico	Multiple Opening/Closing Net Environmental Sensing Sytem (MOCNESS)	Fish eggs identified to mitochondrial barcoding gene (COI).	2	TTATCGGGGCAGAGCTGAGCCAGCCCGGGGCTCTCCTTGGTGATGACCAAATTTATAATGTAATCGTCACTGCGCACGCTTTCGTGATGATTTTCTTCATAGTAATACCTCTAATAATCGGAGGCTTCGGCAACTGGCTGATCCCCCTAATGATTGGGGCCCCCGACATGGCTTTCCCCCGAATGAACAATATGAGTTTCTGACTCCTCCCCCCTTCCTTCCTTCTCCTCTTGGCATCATCAGGTGTTGAGGCAGGAGCCGGAACAGGGTGAACTGTCTACCCCCCTTTGGCAGGCAATCTCGCGCATGCGGGAGCCTCAGTAAACCTAACCATCTTTTCGCTTCATTTAGCGGGCATCTCATCTATTCTAGGGGCCATCAACTTTATTACGACTATTA…
26	St586-6	Taractichthys longipinnis	Seawater	2012-02-16	02:16:00	0-19	28.9963	-87.5155	58	USA: Gulf of Mexico	Multiple Opening/Closing Net Environmental Sensing Sytem (MOCNESS)	Fish eggs identified to mitochondrial barcoding gene (COI).	1	TATCCGCGCTGAACTAAGCCAACCAGGCGCCCTTCTCGGAGACGACCAGATCTATAATGTTATCGTTACAGCACATGCTTTCGTAATAATCTTCTTTATAGTAATACCAATTATAATCGGAGGGTTCGGAAACTGACTTATCCCCCTAATGATTGGAGCCCCTGATATAGCATTTCCCCGAATAAATAATATAAGCTTTTGACTACTACCCCCCTCTTTCCTGCTACTTCTTGCCTCTTCAGGGGTTGAAGCAGGGGCCGGAACCGGATGAACAGTTTACCCACCCTTAGCCGGCAACCTAGCCCATGCTGGAGCATCTGTAGATCTAACCATTTTTTCTCTCCACTTAGCAGGGGTCTCCTCAATTCTAGGAGCCATTAACTTTATCACAACAATTAT…
27	St586-10	Vinciguerria nimbaria	Seawater	2012-02-16	02:16:00	0-19	28.9963	-87.5155	58	USA: Gulf of Mexico	Multiple Opening/Closing Net Environmental Sensing Sytem (MOCNESS)	Fish eggs identified to mitochondrial barcoding gene (COI).	1	CCTTGGTGATGACCCAATTTATAATGTAATCGTCCCTGCGCATGCTGTTCTGATGATTTTCTTCATATTAATTCCTCTAATAATCGGAGGCTTCGGCAACTGGCTGAACCCCCTAATGGTTGGGGCCCCCGACATGGCTTTCCCCCGAATGAACAATATGATTTTCTGACTCCTCCCCCCTTCCTTCCTTCTCCTCTTGGCATCATCAGGTGTTGAGGCAGGAGCCGGAACAGGGTGAACTGTCTACCCCCCTTTGGCAGGCAATCTCGCGCATGCGGGAGCCTCAGTAGACCTAACCATCTTTTCGCTTCATTTAGCGGGCATCTCATCTATTCTAGGGGCCATCAACTTTATTACGACTATTATCAATATGAAGCCTCCTGCAATTTCTCATTACCA…
28	St586-42	Diplospinus multistriatus	Seawater	2012-02-16	02:16:00	0-19	28.9963	-87.5155	58	USA: Gulf of Mexico	Multiple Opening/Closing Net Environmental Sensing Sytem (MOCNESS)	Fish eggs identified to mitochondrial barcoding gene (COI).	1	ATCTATAACGTAATCGTTACAGCACATGCCTTCGTAATAATTTTCTTTATAGTAATGCCCATTATGATCGGAGGGTTCGGAAACTGATTAATTCCCCTAATGATCGGGGCCCCCGATATGGCTTTCCCCCGTATAAACAATATGAGCTTTTGACTCCTCCCCCCCTCGTTCCTTCTTCTGCTAGCTTCTTCAGGAGTCGAATCTGGGGCCGGAACAGGATGAACAGTTTATCCGCCTCTCGCAGGCAACTTAGCCCACGCAGGCGCATCCCTAGACTTAACCATTTTTTCTCTACACTTGGCAGGGATCTCCTCAATTCTTGGGGCAATTAACTTCATCACTACAATTATTAACATAAAACCTGCCGCCATCTCGCAGTACCAAACCCCACTGTTTGTC…
29	St586_Contig_1	Vinciguerria nimbaria	Seawater	2012-02-16	02:16:00	0-19	28.9963	-87.5155	58	USA: Gulf of Mexico	Multiple Opening/Closing Net Environmental Sensing Sytem (MOCNESS)	Fish eggs identified to mitochondrial barcoding gene (COI).	13	GGGGGTTATCGGGGCAGAGCTGAGCCAGCCCGGGGCTCTCCTTGGTGATGACCAAATTTATAATGTAATCGTCACTGCGCACGCTTTCGTGATGATTTTCTTCATAGTAATACCTCTAATAATCGGAGGCTTCGGCAACTGGCTGATCCCCCTAATGATTGGGGCCCCCGACATGGCTTTCCCCCGAATGAACAATATGAGTTTCTGACTCCTCCCCCCTTCCTTCCTTCTCCTCTTGGCATCATCAGGTGTTGAGGCAGGAGCCGGAACAGGGTGAACTGTCTACCCCCCTTTGGCAGGCAATCTCGCGCATGCGGGAGCCTCAGTAGACCTAACCATCTTTTCGCTTCATTTAGCGGGCATCTCATCTATTCTAGGGGCCATCAACTTTATTACGAC…
30	St586_Contig_2	Chauliodus sloani	Seawater	2012-02-16	02:16:00	0-19	28.9963	-87.5155	58	USA: Gulf of Mexico	Multiple Opening/Closing Net Environmental Sensing Sytem (MOCNESS)	Fish eggs identified to mitochondrial barcoding gene (COI).	4	TGGCACCGCAGTAAGCCTGTTAATTCGAGCAGAGCTCAGCCAACCCGGCGCCTTCATAGGCGACGACCAAATTTATAATGTCATCGTCACAGCACATGCCTTCGTAATAATTTTCTTTATGGTGATGCCCATCATGATCGGGGGCTTCGGAAACTGACTAGTGCCCCTAATGATCGGGGCCCCAGATATAGCCTTCCCCCGAATAAACAACATGAGCTTCTGGCTCCTCCCTCCCTCATTTCTTCTTCTGCTCGCCTCTTCTGGGGTTGAAGCTGGGGCCGGAACCGGGTGAACTGTATACCCACCCCTCTCAGGAAACCTTGCCCACGCTGGTGCCTCCGTCGACCTCACAATTTTCTCCCTCCACCTAGCAGGGATTTCTTCTATTCTGGGGGCAAT…
31	St661-11	Ariomma bondi	Seawater	2012-02-17	15:54:00	100-131	29.2108	-85.9963	66	USA: Gulf of Mexico	Multiple Opening/Closing Net Environmental Sensing Sytem (MOCNESS)	Fish eggs identified to mitochondrial barcoding gene (COI).	1	CTTAAGCCTACTCATCCTAGCTGAACTAAACCAACCAGGCGCCCTTCTTGGGGACGACCAAATCTATAACGTAATCGTTACAGCACACGCCTTCGTAATAATTTTCTTTATAGTAATACCAATCATAATTGGAGGATTTGGAAACTGGCTCATCCCACTAATGATCGGGGCCCCAGACATAGCATTCCCTCGAATAAACAACATGAGCTTCTGACTTCTACCTCCTTCTTTCCTACTTCTCCTAGCCTCTTCTGGGGTTGAAGCCGGTGCCGGAACTGGATGGACAGTGTACCCTCCCCTAGCCGGCAATCTAGCACACGCTGGAGCATCAGTCGACCTAACTATTTTTTCTCTTCATCTCGCAGGGGTTTCCTCAATTCTTGGGGCTATTAACTTCAT…
32	St661	Maurolicus weitzmani	Seawater	2012-02-17	15:54:00	100-131	29.2108	-85.9963	66	USA: Gulf of Mexico	Multiple Opening/Closing Net Environmental Sensing Sytem (MOCNESS)	Fish eggs identified to mitochondrial barcoding gene (COI).	46	CGGTGCCTGAGCCGGGATAGTCGGCACAGCCCTAAGCCTGCTCATTCGAGCAGAACTCAGCCAGCCCGGAGCTCTCCTGGGCGACGACCAGATCTACAACGTACTGGTCACAGCTCACGCCTTCGTAATAATTTTCTTTATAGTCATGCCTATTATAATTGGAGGCTTTGGGAACTGACTAATTCCCCTAATGATCGGGGCCCCAGACATAGCCTTTCCTCGAATAAACAACATAAGCTTCTGACTCCTGCCGCCCTCCTTCCTTCTCCTTTTAGCCTCCTCCGGGGTTGAAGCAGGCGCAGGAACTGGGTGAACCGTTTACCCTCCTCTTGCTAGCAACTTGGCCCACGCAGGGGCCTCTGTCGACCTTACCATTTTCTCGCTCCATCTCGCAGGTAT…
33	St663-7	Maurolicus weitzmani	Seawater	2012-02-17	16:07:00	60-79	29.2108	-85.9963	66	USA: Gulf of Mexico	Multiple Opening/Closing Net Environmental Sensing Sytem (MOCNESS)	Fish eggs identified to mitochondrial barcoding gene (COI).	1	ATTTTTCAAGGGCGACGACCAGATCTACAACGTACTGGTCACAGCTCACGCCTTCGTAATAATTTTCTTTATAGTCATGCCTATTATAATTGGAGGCTTTGGGAACTGACTAATTCCCCTAATGATCGGGGCCCCAGACATAGCCTTTCCTCGAATAAACAACATAAGCTTCTGACTCCTGCCGCCCTCCTTCCTTCTCCTTTTAGCCTCCTCCGGGGTTGAAGCAGGCGCAGGAACTGGGTGAACCGTTTACCCTCCTCTTGCTAGCAACTTGGCCCACGCAGGGGCCTCTGTCGACCTTACCATTTTCTCGCTCCATCTCGCAGGTATTTCCTCAATCCTTGGAGCAATTAATTTTATTACCACTATTATTAACATAAAGCCCCCTGCTATCTCCCA…
34	St663-27	Maurolicus weitzmani	Seawater	2012-02-17	16:07:00	60-79	29.2108	-85.9963	66	USA: Gulf of Mexico	Multiple Opening/Closing Net Environmental Sensing Sytem (MOCNESS)	Fish eggs identified to mitochondrial barcoding gene (COI).	1	AGCTCTCCCGGGCTACAACAAAATCTACAACGTACTGGTCGCAGCTCACGCCTTCGTAATAATTTTCTTTATAGTCATGCCTATTATAATTGGAGGCTTTGGGAACTGACTAATTCCCCTAATGATCGGGGCCCCAGACATAGCCTTTCCTCGAATAAACAACATAAGCTTCTGACTCCTGCCGCCCTCCTTCCTTCTCCTTTTAGCCTCCTCCGGGGTTGAAGCAGGCGCAGGAACTGGGTGAACCGTTTACCCTCCTCTTGCTAGCAACTTGGCCCACGCAGGGGCCTCTGTCGACCTTACCATTTTCTCGCTCCATCTCGCAGGTATTTCCTCAATCCTTGGAGCAATTAATTTTATTACCACTATTATTAACATAAAGCCCCCTGCTATCTCCCA…
35	St663-31	Synagrops trispinosus	Seawater	2012-02-17	16:07:00	60-79	29.2108	-85.9963	66	USA: Gulf of Mexico	Multiple Opening/Closing Net Environmental Sensing Sytem (MOCNESS)	Fish eggs identified to mitochondrial barcoding gene (COI).	1	AAAAAATTTACAATGTAATCGTAACGGCGCATGCCTTTGTAATAATTTTCTTTATAGTAATACCCATCATAATTGGAGGTTTCGGAAATTGACTAATTCCCCTAATGATTGGGGCCCCTGACATGGCATTCCCTCGAATGAATAATATGAGTTTTTGACTCCTTCCCCCTTCTTTCCTTCTCCTCCTCTCTTCCTCTGCAGTTGAGGCTGGGGCCGGCACCGGATGAACAGTATACCCCCCTTTAGCAAGTAACCTTGCCCACGCGGGGGCCTCTGTAGA
36	St663-33	Maurolicus weitzmani	Seawater	2012-02-17	16:07:00	60-79	29.2108	-85.9963	66	USA: Gulf of Mexico	Multiple Opening/Closing Net Environmental Sensing Sytem (MOCNESS)	Fish eggs identified to mitochondrial barcoding gene (COI).	1	TGTATCTACTGTTTACTGGTCACAGCTCACGCCTTCGTAATAATTTTCTTTATAGTCATGCCTATTATAATTGGAGGCTTTGGGAACTGACTAATTCCCCTAATGATCGGGGCCCCAGACATAGCCTTTCCTCGAATAAACAACATAAGCTTCTGACTCCTGCCGCCCTCCTTCCTTCTCCTTTTAGCCTCCTCCGGGGTTGAAGCAGGCGCAGGAACTGGGTGAACCGTTTACCCTCCTCTTGCTAGCAACTTGGCCCACGCAGGGGCCTCTGTCGACCTTACCATTTTCTCGCTCCATCTCGCAGGTATTTCCTCAATCCTTGGAGCAATTAATTTTATTACCACTATTATTAACATAAAGCCCCCTGCTATCTCCCAATACCAAACACCTCTTTTTG
37	St663-37	Maurolicus weitzmani	Seawater	2012-02-17	16:07:00	60-79	29.2108	-85.9963	66	USA: Gulf of Mexico	Multiple Opening/Closing Net Environmental Sensing Sytem (MOCNESS)	Fish eggs identified to mitochondrial barcoding gene (COI).	1	TGCTCAGAGGTGTCAGAGTGGCTGCCGGGAAAGAAACTCAGCCAGCCCGGAGCTCTCCTGGGCGACGACCAGATCTACAACGTACTGGTCACAGCTCACGCCTTCGTAATAATTTTCTTTATAGTCATGCCTATTATAATTGGAGGCTTTGGGAACTGACTAATTCCCCTAATGATCGGGGCCCCAGACATAGCCTTTCCTCGAATAAACAACATAAGCTTCTGACTCCTGCCGCCCTCCTTCCTTCTCCTTTTAGCCTCCTCCGGGGTTGAAGCAGGCGCAGGAACTGGGTGAACCGTTTACCCTCCTCTTGCTAGCAACTTGGCCCACGCAGGGGCCTCTGTCGACCTTACCATTTTCTCGCTCCATCTCGCAGGTATTTCCTCAATCCTTGGAGCA…
38	St663-38	Maurolicus weitzmani	Seawater	2012-02-17	16:07:00	60-79	29.2108	-85.9963	66	USA: Gulf of Mexico	Multiple Opening/Closing Net Environmental Sensing Sytem (MOCNESS)	Fish eggs identified to mitochondrial barcoding gene (COI).	1	GTTTCAGGGGGCCTTTTTTTTAAACTCAGCCAGCCGGGAGCTCTCCTGGGCGACGACCAGATCTACAACGTACTGGTCACAGCCCACGCCTTCGTAATAATTTTCTTTATAGTCATGCCTATTATAATTGGAGGCTTTGGGAACTGACTAATTCCCCTAATGATCGGGGCCCCAGACATAGCCTTTCCTCGAATAAACAACATAAGCTTCTGACTCCTGCCGCCCTCCTTCCTTCTCCTTTTAGCCTCCTCCGGGGTTGAAGCAGGCGCAGGAACTGGGTGAACCGTTTACCCTCCTCTTGCTAGCAACTTGGCCCACGCAGGGGCCTCTGTCGACCTTACCATTTTCTCGCTCCATCTCGCAGGTATTTCCTCAATCCTTGGAGCAATTAATTTTATT…
39	St663_Contig_1	Maurolicus weitzmani	Seawater	2012-02-17	16:07:00	60-79	29.2108	-85.9963	66	USA: Gulf of Mexico	Multiple Opening/Closing Net Environmental Sensing Sytem (MOCNESS)	Fish eggs identified to mitochondrial barcoding gene (COI).	10	GTGTCCCGAGTGTTGCTTGTTCGAGCAGAACTCAGCCGGCCCGGAGCTCTCCTGGGCGACGACCAGATCTACAACGTACTGGTCACAGCTCACGCCTTCGTAATAATTTTCTTTATAGTCATGCCTATTATAATTGGAGGCTTTGGGAACTGACTAATTCCCCTAATGATCGGGGCCCCAGACATAGCCTTTCCTCGAATAAACAACATAAGCTTCTGACTCCTGCCGCCCTCCTTCCTTCTCCTTTTAGCCTCCTCCGGGGTTGAAGCAGGCGCAGGAACTGGGTGAACCGTTTACCCTCCTCTTGCTAGCAACTTGGCCCACGCAGGGGCCTCTGTCGACCTTACCATTTTCTCGCTCCATCTCGCAGGTATTTCCTCAATCCTTGGAGCAATTAAT…
40	St663_Contig_2	Maurolicus weitzmani	Seawater	2012-02-17	16:07:00	60-79	29.2108	-85.9963	66	USA: Gulf of Mexico	Multiple Opening/Closing Net Environmental Sensing Sytem (MOCNESS)	Fish eggs identified to mitochondrial barcoding gene (COI).	4	GAGACTCATTCGAGCAGAACTCAGCCAGCCCGGAGCTCTCCTGGGCGACGACCAGATCTACAACGTACTGGTCACAGCTCACGCCTTCGTAATAATTTTCTTTATAGTCATGCCTATTATAATTGGAGGCTTTGGGAACTGACTAATTCCCCTAATGATCGGGGCCCCAGACATAGCCTTTCCTCGAATAAACAACATAAGCTTCTGACTCCTGCCGCCCTCCTTCCTTCTCCTTTTAGCCTCCTCCGGGGTTGAAGCAGGCGCAGGAACTGGGTGAACCGTTTACCCTCCTCTTGCTAGCAACTTGGCCCACGCAGGGGCCTCTGTCGACCTTACCATTTTCTCGCTCCATCTCGCAGGTATTTCCTCAATCCTTGGAGCAATTAATTTTATTACCAC…
41	St663_Contig_3	Maurolicus weitzmani	Seawater	2012-02-17	16:07:00	60-79	29.2108	-85.9963	66	USA: Gulf of Mexico	Multiple Opening/Closing Net Environmental Sensing Sytem (MOCNESS)	Fish eggs identified to mitochondrial barcoding gene (COI).	3	CTGCTCATTGGAGCAGAACTCAGCCAGCCCGGAGCTCTCCTGGGCGACGACCAGATCTACAACGTACTGGTCACAGCTCACGCCTTCGTAATAATTTTCTTTATAGTCATGCCTATTATAATTGGAGGCTTTGGGAACTGACTAATTCCCCTAATGATCGGGGCCCCAGACATAGCCTTTCCTCGAATAAACAACATAAGCTTCTGACTCCTGCCGCCCTCCTTCCTTCTCCTTTTAGCCTCCTCCGGGGTTGAAGCAGGCGCAGGAACTGGGTGAACCGTTTACCCTCCTCTTGCTAGCAACTTGGCCCACGCAGGGGCCTCTGTCGACCTTACCATTTTCTCGCTCCATCTCGCAGGTATTTCCTCAATCCTTGGAGCAATTAATTTTATTACCACT…
42	St663_Contig_4	Maurolicus weitzmani	Seawater	2012-02-17	16:07:00	60-79	29.2108	-85.9963	66	USA: Gulf of Mexico	Multiple Opening/Closing Net Environmental Sensing Sytem (MOCNESS)	Fish eggs identified to mitochondrial barcoding gene (COI).	3	CTTTAAAAAACTAGGCGACGACCAGATCTACAACGTACTGGTCACAGCTCACGCCTTCGTAATAATTTTCTTTATAGTCATGCCTATTATAATTGGAGGCTTTGGGAACTGACTAATTCCCCTAATGATCGGGGCCCCAGACATAGCCTTTCCTCGAATAAACAACATAAGCTTCTGACTCCTGCCGCCCTCCTTCCTTCTCCTTTTAGCCTCCTCCGGGGTTGAAGCAGGCGCAGGAACTGGGTGAACCGTTTACCCTCCTCTTGCTAGCAACTTGGCCCACGCAGGGGCCTCTGTCGACCTTACCATTTTCTCGCTCCATCTCGCAGGTATTTCCTCAATCCTTGGAGCAATTAATTTTATTACCACTATTATTAACATAAAGCCCCCTGCTATCTC…
43	St663_Contig_5	Maurolicus weitzmani	Seawater	2012-02-17	16:07:00	60-79	29.2108	-85.9963	66	USA: Gulf of Mexico	Multiple Opening/Closing Net Environmental Sensing Sytem (MOCNESS)	Fish eggs identified to mitochondrial barcoding gene (COI).	2	AAAAAATGCCGGCCCGGAGCTCTCCTGGGCGAAAACCAAATCTACAACGTACTGGTCACAGCTCACGCCTTCGTAATAATTTTCTTTATAGTCATGCCTATTATAATTGGAGGCTTTGGGAACTGACTAATTCCCCTAATGATCGGGGCCCCAGACATAGCCTTTCCTCGAATAAACAACATAAGCTTCTGACTCCTGCCGCCCTCCTTCCTTCTCCTTTTAGCCTCCTCCGGGGTTGAAGCAGGCGCAGGAACTGGGTGAACCGTTTACCCTCCTCTTGCTAGCAACTTGGCCCACGCAGGGGCCTCTGTCGACCTTACCATTTTCTCGCTCCATCTCGCAGGTATTTCCTCAATCCTTGGAGCAATTAATTTTATTACCACTATTATTAACATAAAG…
44	St663_Contig_6	Synagrops trispinosus	Seawater	2012-02-17	16:07:00	60-79	29.2108	-85.9963	66	USA: Gulf of Mexico	Multiple Opening/Closing Net Environmental Sensing Sytem (MOCNESS)	Fish eggs identified to mitochondrial barcoding gene (COI).	2	GAGACCTGAAGACGAGCAGAGCTCAGCCAACCCGGGGCCTTTCTAGGAGACGACCAGATTTACAATGTAATCGTAACGGCGCATGCCTTTGTAATAATTTTCTTTATAGTAATACCCATCATAATTGGRGGTTTCGGAAATTGACTGATTCCCCTAATGATTGGGGCCCCTGACATGGCATTCCCTCGAATGAATAATATGAGTTTTTGACTCCTTCCCCCTTCTTTCCTTCTCCTCCTCTCTTCCTCTGCAGTTGAGGCTGGGGCCGGCACCGGATGAACAGTATACCCCCCTTTAGCAAGTAACCTTGCCCACGCGGGGGCCTCTGTAGA
45	St664_Contig_1	Macroramphosus scolopax	Seawater	2012-02-17	16:14:00	40-59	29.2108	-85.9963	66	USA: Gulf of Mexico	Multiple Opening/Closing Net Environmental Sensing Sytem (MOCNESS)	Fish eggs identified to mitochondrial barcoding gene (COI).	2	CTTACTTATCCGAGCAAAACTAAGCCAACCCGGCGCCCTTCTTGGGGATGACCAAATTTATAACGTAATTGTTACGGCCCACGCCTTTGTAATGATTTTCTTTATAGTAATACCAATCATGATTGGGGGCTTTGGCAACTGACTTATTCCCCTAATGATCGGAGCACCCGACATGGCATTCCCTCGAATGAACAACATGAGCTTTTGACTACTCCCTCCCTCATTCCTTCTGCTTCTAGCCTCTTCTGGAGTTGAAGCTGGTGCGGGCACCGGCTGAACAGTTTACCCCCCACTATCTGGAAACCTCGCTCACGCTGGGGCCTCCGTTGACTTAACCATTTTCTCCCTCCACTTAGCCGGTATTTCATCTATTCTAGGGGCCATTAACTTCATCACAAC…
46	St665-26	Prionotus stearnsi	Seawater	2012-02-17	16:21:00	20-39	29.2108	-85.9963	66	USA: Gulf of Mexico	Multiple Opening/Closing Net Environmental Sensing Sytem (MOCNESS)	Fish eggs identified to mitochondrial barcoding gene (COI).	1	TTGGTGCCTGAGCCGGAATAGTCGGCACAGCTTTAAGCCTACTGATCCGAGCGGAGCTAAGTCAACCCGGCCCCCTCCTGGGCGACGACCAACTTTACAACGTAATCGTTACGGCGCATGCTTTTGTAATAATCTTTTTTATAGTAATGCCTGTAATAATTGGAGGCTTTGGAAACTGACTTATTCCCCTAATGATCGGGGCCCCCGACATGGCCTTTCCTCGAATAAATAACATGAGCTTCTGACTTCTTCCCCCCTCCTTCCTACTCCTGCTTACATCCTCCGCCGTAGAAGCTGGGGCAGGCACAGGATGGACCGTCTATCCCCCTCTCGCCGGAAACCTCGCCCACGCAGGAGCCTCCGTGGACCTTGCAATTTTTTCACTCCATCTAGCAGGTA…
47	St665_Contig_2	Macroramphosus scolopax	Seawater	2012-02-17	16:21:00	20-39	29.2108	-85.9963	66	USA: Gulf of Mexico	Multiple Opening/Closing Net Environmental Sensing Sytem (MOCNESS)	Fish eggs identified to mitochondrial barcoding gene (COI).	3	AGCTTACTTATCCGAGCAAAACTAAGCCAACCCGGCGCCCTTCTTGGGGATGACCAAATTTATAACGTAATTGTTACGGCCCACGCCTTTGTAATGATTTTCTTTATAGTAATACCAATCATGATTGGGGGCTTTGGCAACTGACTTATTCCCCTAATGATCGGAGCACCCGACATGGCATTCCCTCGAATGAACAACATGAGCTTTTGACTACTCCCTCCCTCATTCCTTCTGCTTCTAGCCTCTTCTGGAGTTGAAGCTGGTGCGGGCACCGGCTGAACAGTTTACCCCCCACTATCTGGAAACCTCGCTCACGCTGGGGCCTCCGTTGACTTAACCATTTTCTCCCTCCACTTAGCCGGTATTTCATCTATTCTAGGGGCCATTAACTTCATCACA…
48	St665_Contig_4	Ariomma bondi	Seawater	2012-02-17	16:21:00	20-39	29.2108	-85.9963	66	USA: Gulf of Mexico	Multiple Opening/Closing Net Environmental Sensing Sytem (MOCNESS)	Fish eggs identified to mitochondrial barcoding gene (COI).	2	TATTTGGTGCATGAGCTGGAATAGTAGGTACAGCCTTAAGCCTACTCATCCGAGCTGAACTAAACCAACCAGGCGCCCTTCTTGGGGACGACCAAATCTATAACGTAATCGTTACAGCACACGCCTTCGTAATAATTTTCTTTATAGTAATACCAATCATAATTGGAGGATTTGGAAACTGGCTCATCCCACTAATGATCGGGGCCCCAGACATAGCATTCCCTCGAATAAACAACATGAGCTTCTGACTTCTACCTCCTTCTTTCCTACTTCTCCTAGCCTCTTCTGGGGTTGAAGCCGGTGCCGGAACTGGATGGACAGTGTACCCTCCCCTAGCCGGCAATCTAGCACACGCTGGAGCATCAGTCGACCTAACTATTTTTTCTCTTCATCTCGCAG…
49	St665_Contig_5	Synagrops trispinosus	Seawater	2012-02-17	16:21:00	20-39	29.2108	-85.9963	66	USA: Gulf of Mexico	Multiple Opening/Closing Net Environmental Sensing Sytem (MOCNESS)	Fish eggs identified to mitochondrial barcoding gene (COI).	2	TTACCTAGTGTTCGGTGCCTGAGCCGGAATGGTAGGCACCGCCCTTAGCCTGCTTATTCGAGCAGAGCTCAGCCAACCCGGGGCCTTTCTAGGAGACGACCAGATTTACAATGTAATCGTAACGGCGCATGCCTTTGTAATAATTTTCTTTATAGTAATACCCATCATAATTGGAGGTTTCGGAAATTGACTGATTCCCCTAATGATTGGGGCCCCTGACATGGCATTCCCTCGAATGAATAATATGAGTTTTTGACTYCTTCCCCCTTCTTTCCTTCTCCTCCTCTCTTCCTCTGCAGTTGAGGCTGGGGCCGGCACCGGATGAACAGTRTACCCCCCTTTAGCAAGTAACCTTGCCCACGCGGGGGCCTCTGTAGA
50	St665_Contig_6	Saurida brasiliensis	Seawater	2012-02-17	16:21:00	20-39	29.2108	-85.9963	66	USA: Gulf of Mexico	Multiple Opening/Closing Net Environmental Sensing Sytem (MOCNESS)	Fish eggs identified to mitochondrial barcoding gene (COI).	2	TAGTATTTGGTGCATGAGCCGGATAGTGGGCACTGCCCTAAGTTTACTTATCCGAGCCGAATTAAGCCAACCCGGGGCCCTTTTAGGGGACGATCAAATCTACAACGTAATTGTTACCGC
51	St666_Contig_1	Ariomma bondi	Seawater	2012-02-17	16:28:00	0-20	29.2108	-85.9963	66	USA: Gulf of Mexico	Multiple Opening/Closing Net Environmental Sensing Sytem (MOCNESS)	Fish eggs identified to mitochondrial barcoding gene (COI).	32	ATTTGGTGCATGAGCTGGAATAGTAGGTACAGCCTTAAGCCTACTCATCCGAGCTGAACTAAACCAACCAGGCGCCCTTCTTGGGGACGACCAAATCTATAACGTAATCGTTACAGCACACGCCTTCGTAATAATTTTCTTTATAGTAATACCAATCATAATTGGAGGATTTGGAAACTGGCTCATCCCACTAATGATCGGGGCCCCAGACATAGCATTCCCTCGAATAAACAACATGAGCTTCTGACTTCTACCTCCTTCTTTCCTACTTCTCCTAGCCTCTTCTGGGGTTGAAGCCGGTGCCGGAACTGGATGGACAGTGTACCCTCCCCTAGCCGGCAATCTAGCACACGCTGGAGCATCAGTCGACCTAACTATTTTTTCTCTTCATCTCGCAGG…
52	St666_Contig_2	Prionotus stearnsi	Seawater	2012-02-17	16:28:00	0-20	29.2108	-85.9963	66	USA: Gulf of Mexico	Multiple Opening/Closing Net Environmental Sensing Sytem (MOCNESS)	Fish eggs identified to mitochondrial barcoding gene (COI).	3	TATTTGGTGCCTGAGCCGGATAGTCGGCACAGCTTTAAGCCTACTGATCCGAGCGGAGCTAAGTCAACCCGGCCCCCTCCTAGGCGACGACCAACTTTACAACGTAATCGTTACGGCGCATGCTTTTGTAATAATCTTTTTTATAGTAATGCCTGTAATAATTGGAGGCTTTGGAAACTGACTTATTCCCCTAATGATCGGGGCCCCCGACATGGCCTTTCCTCGAATAAATAACATGAGCTTCTGACTTCTTCCCCCCTCCTTCCTACTCCTGCTTACATCCTCCGCCGTAGAAGCTGGGGCAGGCACAGGATGGACCGTCTATCCCCCTCTCGCCGGAAACCTCGCCCACGCAGGAGCCTCCGTGGACCTTGCAATTTTTTCACTCCATCTAGCAGG…
53	St666_Contig_3	Prionotus stearnsi	Seawater	2012-02-17	16:28:00	0-20	29.2108	-85.9963	66	USA: Gulf of Mexico	Multiple Opening/Closing Net Environmental Sensing Sytem (MOCNESS)	Fish eggs identified to mitochondrial barcoding gene (COI).	2	TTGGTGCCTGAGCCGGAATAGTCGGCACAGCTTTAAGCCTACTGATCCGAGCGGAGCTAAGTCAACCCGGCCCCCTCCTAGGCGACGACCAACTTTACAACGTGATCGTTACGGCGCATGCTTTTGTAATAATCTTTTTTATAGTAATGCCTGTAATAATTGGAGGCTTTGGRAACTGACTTATTCCCCTAATGATCGGGGCCCCCGACATGGCCTTTCCTCGAATAAATAACATGAGCTTCTGACTTCTTCCCCCCTCCTTCCTACTCCTGCTTACATCCTCCGCCGTAGARGCTGGGGCAGGTACAGGATGGACCGTCTACCCCCCTCTCGCCGGAAACCTCGCCCACGCAGGAGCCTCCGTGGACCTTGCAATTTTTTCACTCCATCTAGCAGGTA…
54	St666_Contig_4	Saurida brasiliensis	Seawater	2012-02-17	16:28:00	0-20	29.2108	-85.9963	66	USA: Gulf of Mexico	Multiple Opening/Closing Net Environmental Sensing Sytem (MOCNESS)	Fish eggs identified to mitochondrial barcoding gene (COI).	2	TAGTATTTGGTGCATGAGCCGGATAGTGGGCACTGCCCTAAGTTTACTTATCCGAGCCGAATTAAGCCAACCCGGGGCCCTTTTAGGGGACGATCAAATCTACAACGTAATTGTTACCGC
55	St801-1	Polyipnus clarus	Seawater	2012-02-21	12:35:00	98-128	28.0052	-85.0002	80	USA: Gulf of Mexico	Multiple Opening/Closing Net Environmental Sensing Sytem (MOCNESS)	Fish eggs identified to mitochondrial barcoding gene (COI).	1	GGCGGAATTAAGCCAACCGGGCGCGCTCTTAGGCGACGATCAAATCTACAATGTTTTAGTAACAGCACATGCATTCGTAATAATTTTCTTCATAGTTATACCCATCATGATCGGCGGTTTCGGGAACTGGCTCATCCCCCTCATGATCGGAGCCCCCGATATGGCTTTCCCTCGAATAAATAATATAAGCTTCTGGCTTCTACCCCCTTCTTTCCTCCTCCTCCTTGCCTCTTCAGGTGTTGAGGCCGGGGCTGGAACAGGCTGAACCGTTTACCCACCTCTCGCTGGAAATTTGGCCCACGCCGGAGCTTCCGTGGACCTCACTATTTTCTCCCTTCATCTCGCAGGCATTTCTTCCATTCTAGGGGCTATTAACTTTATTACTACAATTATTAACAT…
56	St801-2	Etrumeus sadina	Seawater	2012-02-21	12:35:00	98-128	28.0052	-85.0002	80	USA: Gulf of Mexico	Multiple Opening/Closing Net Environmental Sensing Sytem (MOCNESS)	Fish eggs identified to mitochondrial barcoding gene (COI).	1	AAAGCTAAGCCAGCCTGGAGCCTTGTTAGGCGATGACCAAATTTATAACGTAATTGTTACTGCACATGCCTTTGTTATGATTTTCTTCATAGTAATGCCAATTTTAATTGGCGGGTTCGGAAACTGACTAGTACCCCTTATGCTTGGGGCACCAGACATGGCATTCCCTCGAATAAATAACATAAGCTTTTGACTTCTTCCCCCTTCCTTTCTTCTCTTGCTCGCCTCATCTGGAGTTGAAGCCGGAGCAGGAACCGGATGGACTGTCTATCCCCCTCTAGCAGGTAATCTCGCCCACGCAGGAGCATCTGTTGACTTAACTATTTTCTCACTCCACCTGGCAGGGATTTCTTCAATTCTTGGGGCAATCAATTTTATTACCACAATTATTAACATAAA…
57	St802-18	Maurolicus weitzmani	Seawater	2012-02-21	12:46:00	64-98	28.0052	-85.0002	80	USA: Gulf of Mexico	Multiple Opening/Closing Net Environmental Sensing Sytem (MOCNESS)	Fish eggs identified to mitochondrial barcoding gene (COI).	1	ACTCTCCTGGGCGACGACGAAATCTACGACGGACTGGTCACAGCTCACGCCTTCGTAATAATTTTCTTTATAGTCATGCCTATTATAATTGGAGGCTTTGGGAACTGACTAATTCCCCTAATGATCGGGGCCCCAGACATAGCCTTTCCTCGAATAAACAACATAAGCTTCTGACTCCTGCCGCCCTCCTTCCTTCTCCTTTTAGCCTCCTCCGGGGTTGAAGCAGGCGCAGGAACTGGGTGAACCGTTTACCCTCCTCTTGCTAGCAACTTGGCCCACGCAGGGGCCTCTGTCGACCTTACCATTTTCTCGCTCCATCTCGCAGGTATTTCCTCAATCCTTGGAGCAATTAATTTTATTACCACTATTATTAACATAAAGCCCCCTGCTATCTCCCAA…
58	St802-32	Prionotus roseus	Seawater	2012-02-21	12:46:00	64-98	28.0052	-85.0002	80	USA: Gulf of Mexico	Multiple Opening/Closing Net Environmental Sensing Sytem (MOCNESS)	Fish eggs identified to mitochondrial barcoding gene (COI).	1	TTTTGGGCGACGACCAACTTTATAATGTTATCGTAACAGCACAGGCTTTTGTAATAATCTTTTTTATGGTTATACCCATCATGATTGGAGGGTTTGGAAACTGACTTATCCCCTTAATGATTGGGGCCCCTGACATGGCTTTCCCTCGAATAAATAACATGAGCTTCTGACTACTCCCCCCTTCTTTCCTTCTTCTACTAACCTCCTCTGCTGTAGAAGCCGGGGCAGGTACGGGATGAACCGTTTATCCCCCTCTTGCCGGAAATCTCGCCCACGCAGGAGCCTCTGTAGATTTAGCAATTTTTTCACTTCACCTCGCAGGGGTATCTTCAATCCTGGGAGCCATTAATTTTATTACAACTATTTTTAATATGAAACCCCCCGCTATGACCCCTTACC…
59	St803	Maurolicus weitzmani	Seawater	2012-02-21	12:56:00	60-64	28.0052	-85.0002	80	USA: Gulf of Mexico	Multiple Opening/Closing Net Environmental Sensing Sytem (MOCNESS)	Fish eggs identified to mitochondrial barcoding gene (COI).	24	GAGCAGAACTCAGCCAGCCCGGAGCTCTCCTGGGCGACGACCAGATCTACAACGTACTGGTCACAGCTCACGCCTTCGTAATAATTTTCTTTATAGTCATGCCTATTATAATTGGAGGCTTTGGGAACTGACTAATTCCCCTAATGATCGGGGCCCCAGACATAGCCTTTCCTCGAATAAACAACATAAGCTTCTGACTCCTGCCGCCCTCCTTCCTTCTCCTTTTAGCCTCCTCCGGGGTTGAAGCAGGCGCAGGAACTGGGTGAACCGTTTACCCTCCTCTTGCTAGCAACTTGGCCCACGCAGGGGCCTCTGTCGACCTTACCATTTTCTCGCTCCATCTCGCAGGTATTTCCTCAATCCTTGGAGCAATTAATTTTATTACCACTATTATTAACA…
60	St804-1	Synodus intermedius	Seawater	2012-02-21	13:04:00	38-60	28.0052	-85.0002	80	USA: Gulf of Mexico	Multiple Opening/Closing Net Environmental Sensing Sytem (MOCNESS)	Fish eggs identified to mitochondrial barcoding gene (COI).	1	GTCGGGGCTCACGCTTTCCTCCTACCCTTTTTTATAGTAATACCAATTATGATCGGAGGATTTGGAAATTGACTGATTCCACTAATGATTGGCGCCCCCGACATAGCATTTCCTCGTATAAATAACATAAGCTTCTGATTGCTCCCCCCCTCCTTCCTACTTCTTCTTGCCTCCTCTGGCGTTGAAGCTGGAGCGGGGACCGGCTGAACTGTCTACCCCCCCTTAGCAGGCAACTTAGCCCATGCTGGTGCTTCAGTAGATTTAACAATTTTTTCCCTTCACTTAGCCGGAATTTCATCTATTCTCGGAGCAATTAACTTTATCACAACTATTATTAACATAAAACCCCCCTCCATTTCGCAATATCAAACGCCCCTATTCG
61	St804-5	Ariomma bondi	Seawater	2012-02-21	13:04:00	38-60	28.0052	-85.0002	80	USA: Gulf of Mexico	Multiple Opening/Closing Net Environmental Sensing Sytem (MOCNESS)	Fish eggs identified to mitochondrial barcoding gene (COI).	1	GGATAGTAGGCACAGCCTTAAGCCTACTCATCCGAGCTGAACTAAACCAACCAGGCGCCCTTCTTGGGGACGACCAAATCTATAACGTAATCGTTACAGCACACGCCTTCGTAATAATTTTCTTTATAGTAATACCAATCATAATTGGAGGATTTGGAAACTGGCTCATCCCACTAATGATCGGGGCCCCAGACATAGCATTCCCTCGAATAAACAACATGAGCTTCTGACTTCTACCGCCTTCTTTCCTACTTCTCCTAGCCTCTTCTGGGGTTGAAGCCGGTGCCGGAACTGGATGGACAGTGTACCCTCCCCTAGCCGGCAATCTAGCACACGCTGGTGCATCAGTCGACCTAACTATTTTTTCTCTTCATCTCGCAGGGGTTTCCTCAATTCTTG…
62	St804-14	Synodus intermedius	Seawater	2012-02-21	13:04:00	38-60	28.0052	-85.0002	80	USA: Gulf of Mexico	Multiple Opening/Closing Net Environmental Sensing Sytem (MOCNESS)	Fish eggs identified to mitochondrial barcoding gene (COI).	1	CGTAATCGTCACAGCTCACGCTTTCGTCATAATCTTTTTTATAATAATACCAATTATGATCGGAGGATTTGGAAATTGACTGATTCCACTAATGATTGGCGCCCCCGACATAGCATTTCCTCGTATAAATAACATAAGCTTCTGATTGCTCCCCCCCTCCTTCCTACTTCTTCTTGCCTCCTCTGGCGTTGAAGCTGGAGCGGGGACCGGCTGAACTGTCTACCCCCCCTTAGCAGGCAACTTAGCCCATGCTGGTGCTTCAGTAGATTTAACAATTTTTTCCCTTCACTTAGCCGGAATTTCATCTATTCTCGGAGCAATTAACTTTATCACAACTATTATTAACATAAAACCCCCCTCCATTTCGCAATATCAAACGCCCCTATTCG
63	St804-16	Prionotus roseus	Seawater	2012-02-21	13:04:00	38-60	28.0052	-85.0002	80	USA: Gulf of Mexico	Multiple Opening/Closing Net Environmental Sensing Sytem (MOCNESS)	Fish eggs identified to mitochondrial barcoding gene (COI).	1	TTTGGGCGACGACCAACTTTATAATGTTATCGTAACAGCACATGCTTTTGTAATAATCTTTTTTATGGTTATACCCATCATGATTGGAGGGTTTGGAAACTGACTTATCCCCTTAATGATTGGGGCCCCTGACATGGCTTTCCCTCGAATAAATAACATGAGCTTCTGACTACTCCCCCCTTCTTTCCTTCTTCTACTAACCTCCTCTGCTGTAGAAGCCGGGGCAGGTACGGGATGAACCGTTTATCCCCCTCTTGCCGGAAATCTCGCCCACGCAGGAGCCTCTGTAGATTTAGCAATTTTTTCACTTCACCTCGCAGGGGTATCTTCAATCCTGGGAGCCATTAATTTTATTACAACTATTTTTAATATGAAACCCCCCGCTATGACCCCTTACCA…
64	St804-31	Synagrops trispinosus	Seawater	2012-02-21	13:04:00	38-60	28.0052	-85.0002	80	USA: Gulf of Mexico	Multiple Opening/Closing Net Environmental Sensing Sytem (MOCNESS)	Fish eggs identified to mitochondrial barcoding gene (COI).	1	AAAAAGAAAAAAAAGATTTACAATGTAATCGGAACGGCGCATGCCTTTGTAATAATTTTCTTTATAGTAATACCCATCATAATTGGAGGTTTCGGAAATTGACTGATTCCCCTAATGATTGGGGCCCCTGACATGGCATTCCCTCGAATGAATAATATGAGTTTTTGACTCCTTCCCCCTTCTTTCCTTCTCCTCCTCTCTTCCTCTGCAGTTGAGGCTGGGGCCGGCACCGGATGAACAGTATACCCCCCTTTAGCAAGTAACCTTGCCCACGCGGGGGCCTCTGTAGA
65	St804-34	Merluccius albidus	Seawater	2012-02-21	13:04:00	38-60	28.0052	-85.0002	80	USA: Gulf of Mexico	Multiple Opening/Closing Net Environmental Sensing Sytem (MOCNESS)	Fish eggs identified to mitochondrial barcoding gene (COI).	1	TTAGTCAACCAGGCGCACTCCTGGGCGACGATCAAATTTATAACGTGATCGTCACGGCCCACGCCTTCGTAATAATTTTCTTTATAGTAATACCGTTAATAATTGGAGGCTTTGGAAACTGACTCGTCCCCCTAATGATCGGAGCCCCCGACATAGCCTTCCCCCGAATAAACAACATAAGCTTCTGACTTCTCCCTCCGTCTTTCCTGCTCCTCCTAGCATCTTCCGGAGTAGAAGCCGGGGCCGGGACGGGCTGAACAGTGTATCCCCCTCTTGCAAGCAATCTTGCCCACGCTGGCGCCAGCGTAGACCTCACTATTTTTTCACTTCACTTAGCAGGCGTTTCCTCAATTCTGGGAGCAATTAATTTCATTACTACTATTATCAATATGAAGCCCC…
66	St804-35	Ariomma bondi	Seawater	2012-02-21	13:04:00	38-60	28.0052	-85.0002	80	USA: Gulf of Mexico	Multiple Opening/Closing Net Environmental Sensing Sytem (MOCNESS)	Fish eggs identified to mitochondrial barcoding gene (COI).	1	TAAACCAACCAGGCGCCCTTCTTGGGGACGACCAAATCTATAACGTAATCGTTACAGCACACGCCTTCGTAATAATTTTCTTTATAGTAATGCCAATCATAATTGGAGGATTTGGAAACTGGCTTATCCCACTAATGATTGGGGCCCCAGACATAGCATTCCCTCGAATAAACAACATGAGCTTCTGACTTCTACCGCCTTCTTTCCTACTCCTCCTAGCCTCTTCTGGGGTTGAAGCCGGTGCCGGAACCGGGTGGACAGTATATCCTCCCCTGGCCGGTAACCTAGCACACGCTGGGGCATCAGTAGACCTAACTATTTTTTCTCTTCATCTAGCAGGGGTTTCCTCAATCCTTGGGGCTATTAACTTCATCACAACAATTATTAACATGAAACCCG…
67	St804-41	Synagrops trispinosus	Seawater	2012-02-21	13:04:00	38-60	28.0052	-85.0002	80	USA: Gulf of Mexico	Multiple Opening/Closing Net Environmental Sensing Sytem (MOCNESS)	Fish eggs identified to mitochondrial barcoding gene (COI).	1	CAAGGATACGACCGGATTTACAATGTAATCGTAACGGCGCATGCCTTTGTAATAATTTTCTTTATAGTAATACCCATCATAATTGGAGGTTTCGGAAATTGACTGATTCCCCTAATGATTGGGGCCCCTGACATGGCATTCCCTCGAATGAATAATATGAGTTTTTGACTCCTTCCCCCTTCTTTCCTTCTCCTCCTCTCTTCCTCTGCAGTTGAGGCTGGGGCCGGCACCGGATGAACAGTATACCCCCCTTTAGCAAGTAACCTTGCCCACGCGGGGGCCTCTGTAGA
68	St804-48	Ariomma bondi	Seawater	2012-02-21	13:04:00	38-60	28.0052	-85.0002	80	USA: Gulf of Mexico	Multiple Opening/Closing Net Environmental Sensing Sytem (MOCNESS)	Fish eggs identified to mitochondrial barcoding gene (COI).	1	CATCTTATAAAAACTAAACCAACCAGGCGCCCTTCTTGGGGACGACCAAATCTATAACGTAATCGTTACAGCACACGCCTTCGTAATAATTTTCTTTATAGTAATACCAATCATAATTGGAGGATTTGGAAACTGGCTCATCCCACTAATGATCGGGGCCCCAGACATAGCATTCCCTCGAATAAACAACATGAGCTTCTGACTTCTACCGCCTTCTTTCCTACTTCTCCTAGCCTCTTCTGGGGTTGAAGCCGGTGCCGGAACTGGATGGACAGTGTACCCTCCCCTAGCCGGCAATCTAGCACACGCTGGTGCATCAGTCGACCTAACTATTTTTTCTCTTCATCTCGCAGGGGTTTCCTCAATTCTTGGGGCCATTAACTTCATTACAACGATCAT…
69	St804_Contig_1	Ariomma bondi	Seawater	2012-02-21	13:04:00	38-60	28.0052	-85.0002	80	USA: Gulf of Mexico	Multiple Opening/Closing Net Environmental Sensing Sytem (MOCNESS)	Fish eggs identified to mitochondrial barcoding gene (COI).	13	TATTTGGTGCATGAGCTGGAATAGTAKGTACAGCCTTAAGCCTACTCATCCGAGCTGAACTAAACCAACCAGGCGCCCTTCTTGGGGACGACCAAATCTATAACGTAATCGTTACAGCACACGCCTTCGTAATAATTTTCTTTATAGTAATACCAATCATAATTGGAGGATTTGGAAACTGGCTCATCCCACTAATGATCGGGGCCCCAGACATAGCATTCCCTCGAATAAACAACATGAGCTTCTGACTTCTACCTCCTTCTTTCCTACTTCTCCTAGCCTCTTCTGGGGTTGAAGCCGGTGCCGGAACTGGATGGACAGTGTACCCTCCCCTAGCCGGCAATCTAGCACACGCTGGAGCATCAGTCGACCTAACTATTTTTTCTCTTCATCTCGCAG…
70	St804_Contig_2	Scomber colias	Seawater	2012-02-21	13:04:00	38-60	28.0052	-85.0002	80	USA: Gulf of Mexico	Multiple Opening/Closing Net Environmental Sensing Sytem (MOCNESS)	Fish eggs identified to mitochondrial barcoding gene (COI).	9	AAGCTTGCTGATCCGAGCTGAACTAAGTCAACCAGGGTCCCTTCTCGGCGACGACCAAATCTACAACGTAATTGTTACGGCTCACGCCTTCGTTATAATCTTCTTTTTAGTAATGCCAGTTATGATTGGAGGGTTCGGAAACTGACTGATCCCCCTAATGATCGGAGCCCCCGACATGGCATTTCCCCGAATAAATAACATAAGCTTCTGACTTCTGCCCCCATCTCTCCTGCTGCTCCTGTCTTCTTCGGCAGTTGAAGCCGGTGCTGGAACTGGCTGAACAGTTTATCCTCCCCTCGCTGGGAACCTGGCACACGCCGGGGCATCAGTTGATTTAACCATCTTCTCACTCCACCTAGCAGGTGTTTCCTCAATCCTTGGGGCCATTAACTTCATCAC…
71	St804_Contig_3	Synagrops trispinosus	Seawater	2012-02-21	13:04:00	38-60	28.0052	-85.0002	80	USA: Gulf of Mexico	Multiple Opening/Closing Net Environmental Sensing Sytem (MOCNESS)	Fish eggs identified to mitochondrial barcoding gene (COI).	4	AAAGCTCAGCCACCCGGGGCCTTTCAAGGAGACAACCAGATTTACAATGTAATCGTAACGGCGCATGCCTTTGTAATAATTTTCTTTATAGTAATACCCATCATAATTGGAGGTTTCGGAAATTGACTGATTCCCCTAATGATTGGGGCCCCTGACATGGCATTCCCTCGAATGAATAATATGAGTTTTTGACTCCTTCCCCCTTCTTTCCTTCTCCTCCTCTCTTCCTCTGCAGTTGAGGCTGGGGCCGGCACCGGATGAACAGTATACCCCCCTTTAGCAAGTAACCTTGCCCACGCGGGGGCCTCTGTAGA
72	St804_Contig_5	Trachurus lathami	Seawater	2012-02-21	13:04:00	38-60	28.0052	-85.0002	80	USA: Gulf of Mexico	Multiple Opening/Closing Net Environmental Sensing Sytem (MOCNESS)	Fish eggs identified to mitochondrial barcoding gene (COI).	2	TTATTCGGGCAAAACTAAGCCNACCTGGCGCCCTTCTAGGGGATGACCAAATTTACAACGTAATTGTTACGGCCCACGCTTTCGTAATAATTTTCTTTATAGTAATGCCAATTATGATTGGAGGCTTTGGAAACTGACTGATTCCGCTAATGATCGGGGCCCCTGATATAGCCTTCCCTCGAATGAATAACATGAGCTTCTGACTACTCCCTCCCTCCTTCCTCTTGCTTTTAGCCTCTTCAGGGGTTGAAGCCGGGGCCGGAACTGGTTGAACAGTCTATCCCCCRCTGGCTGGGAACCTTGCCCACGCCGGAGCGTCCGTAGACTTAACCATCTTCTCCCTTCACCTAGCAGGGGTCTCGTCAATTCTAGGGGCTATTAATTTTATTACCACTATTA…
73	St805-3	Scomber colias	Seawater	2012-02-21	13:11:00	19-38	28.0052	-85.0002	80	USA: Gulf of Mexico	Multiple Opening/Closing Net Environmental Sensing Sytem (MOCNESS)	Fish eggs identified to mitochondrial barcoding gene (COI).	1	CTCTGACGGGTCTAGCTTTGTTGTGTAGCAAAACTAAGTCAACCAGGGACCCTTCACGGCAACAACCAAATCTACAACGTAATTGTTACGGCTCACGCCTTCGTTATAATCTTCTTTTTAGTAATGCCAGTTATGATTGGAGGGTTCGGAAACTGACTGATCCCCCTAATGATCGGAGCCCCCGACATGGCATTTCCCCGAATAAATAACATAAGCTTCTGACTTCTGCCCCCATCTCTCCTGCTGCTCCTGTCTTCTTCGGCAGTTGAAGCCGGTGCTGGAACTGGCTGAACAGTTTATCCTCCCCTCGCTGGGAACCTGGCACACGCCGGGGCATCAGTTGATTTAACCATCTTCTCACTCCACCTAGCAGGTGTCTCCTCAATCCTTGGGGCCATT…
74	St805-5	Maurolicus weitzmani	Seawater	2012-02-21	13:11:00	19-38	28.0052	-85.0002	80	USA: Gulf of Mexico	Multiple Opening/Closing Net Environmental Sensing Sytem (MOCNESS)	Fish eggs identified to mitochondrial barcoding gene (COI).	1	GGGGTGATCAAATTCAGCCAGCCCGGAGCTCTCCTGGGCGACAACCAGATCTACAACGTACTGGTCACAGCTCACGCCTTCGTAATAATTTTCTTTATAGTCATGCCTATTATAATTGGAGGCTTTGGGAACTGACTAATTCCCCTAATGATCGGGGCCCCAGACATAGCCTTTCCTCGAATAAACAACATAAGCTTCTGACTCCTGCCGCCCTCCTTCCTTCTCCTTTTAGCCTCCTCCGGGGTTGAAGCAGGCGCAGGAACTGGGTGAACCGTTTACCCTCCTCTTGCTAGCAACTTGGCCCACGCAGGGGCCTCTGTCGACCTTACCATTTTCTCGCTCCATCTCGCAGGTATCTCCTCAATCCTTGGAGCAATTAATTTTATTACCACTATTATT…
75	St805-11	Scomber colias	Seawater	2012-02-21	13:11:00	19-38	28.0052	-85.0002	80	USA: Gulf of Mexico	Multiple Opening/Closing Net Environmental Sensing Sytem (MOCNESS)	Fish eggs identified to mitochondrial barcoding gene (COI).	1	GTGCTTTTTAAAAAAAACAACAATAAACAAATCACAACGTAATTGTTACGGCTCACGCCTTCGTTATAATCTTCTTTTTAGTAATGCCAGTTATGATTGGAGGGTTCGGAAACTGACTGATCCCCCTAATGATCGGAGCCCCCGACATGGCATTTCCCCAAAAAAATAACATAAGCTTCTGACTTCTGCCCCCATCTCTCCTGCTGCTCCTGTCTTCTTCGGCAGTTGAAGCCGGTGCTGGAACTGGCTGAACAGTTTATCCTCCCCTCGCTGGGAACCTGGCACACGCCGGGGCATCAGTTGATTTAACCATCTTCTCACTCCACCTAGCAGGTGTTTCCTCAATCCTTGGGGCCATTAACTTCATCACAACAATCATTAACATAAAACCTGCAGGTG…
76	St805-16	Scomber colias	Seawater	2012-02-21	13:11:00	19-38	28.0052	-85.0002	80	USA: Gulf of Mexico	Multiple Opening/Closing Net Environmental Sensing Sytem (MOCNESS)	Fish eggs identified to mitochondrial barcoding gene (COI).	1	TCTACTCCTTATGTGTTACGGATCGGCCCTTCTTTATAAACTTCTTTTTAGTAATGCCAGTTATGATTGGAGGGTTCGGAAACTGACTGATCCCCCTAATGATCGGAGCCCCCGACATGGCATTTCCCCGAATAAATAACATAAGCTTCTGACTTCTGCCCCCATCTCTCCTGCTGCTCCTGTCTTCTTCGGCAGTTGAAGCCGGTGCTGGAACTGGCTGAACAGTTTATCCTCCCCTCGCTGGGAACCTGGCACACGCCGGGGCATCAGTTGATTTAACCATCTTCTCACTCCACCTAGCAGGTGTTTCCTCAATCCTTGGGGCCATTAACTTCATCACAACAATCATTAACATAAAACCTGCAGGTGTATCCCAATACCAAACCCCTCTGTTCGTCT…
77	St805-20	Synagrops trispinosus	Seawater	2012-02-21	13:11:00	19-38	28.0052	-85.0002	80	USA: Gulf of Mexico	Multiple Opening/Closing Net Environmental Sensing Sytem (MOCNESS)	Fish eggs identified to mitochondrial barcoding gene (COI).	1	AAAAGAAAAAACCAAATTTACAATGTAATCGTAACGGCGCAGCCTTTGTAATAATTTTCTTTATAGTAATACCCATCATAATTGGAGGTTTCGGAAATTGACTGATTCCCCTAATGATTGGGGCCCCTGACATGGCATTCCCTCGAATGAATAATATGAGTTTTTGACTCCTTCCCCCTTCTTTCCTTCTCCTCCTCTCTTCCTCTGCAGTTGAGGCTGGGGCCGGCACCGGATGAACAGTATACCCCCCTTTAGCAAGTAACCTTGCCCACGCGGGGGCCTCTGTAGA
78	St805-26	Maurolicus weitzmani	Seawater	2012-02-21	13:11:00	19-38	28.0052	-85.0002	80	USA: Gulf of Mexico	Multiple Opening/Closing Net Environmental Sensing Sytem (MOCNESS)	Fish eggs identified to mitochondrial barcoding gene (COI).	1	TGCTGGGGGGATCAAAACTCAGCCGGCCCGGAGCTCTCCTGGGCGACGACAAGATCTACAACGTACTGGTCACAGCTCACGCCTTCGTAATAATTTTCTTTATAGTCATGCCTATTATAATTGGAGGCTTTGGGAACTGACTAATTCCCCTAATGATCGGGGCCCCAGACATAGCCTTTCCTCGAATAAACAACATAAGCTTCTGACTCCTGCCGCCCTCCTTCCTTCTCCTTTTAGCCTCCTCCGGGGTTGAAGCAGGCGCAGGAACTGGGTGAACCGTTTACCCTCCTCTTGCTAGCAACTTGGCCCACGCAGGGGCCTCTGTCGACCTTACCATTTTCTCGCTCCATCTCGCAGGTATTTCCTCAATCCTTGGAGCAATTAATTTTATTACCACTA…
79	St805-42	Synagrops trispinosus	Seawater	2012-02-21	13:11:00	19-38	28.0052	-85.0002	80	USA: Gulf of Mexico	Multiple Opening/Closing Net Environmental Sensing Sytem (MOCNESS)	Fish eggs identified to mitochondrial barcoding gene (COI).	1	AAAAAGAAAAAAAAAAATTTACAATGTAATCGTAACGGCGCATGCCTTTGTAATAATTTTCTTTATAGTAATACCCATCATAATTGGAGGTTTCGGAAATTGACTGATTCCCCTAATGATTGGGGCCCCTGACATGGCATTCCCTCGAATGAATAATATGAGTTTTTGACTCCTTCCCCCTTCTTTCCTTCTCCTCCTCTCTTCCTCTGCAGTTGAGGCTGGGGCCGGCACCGGATGAACAGTATACCCCCCTTTAGCAAGTAACCTTGCCCACGCGGGGGCCTCTGTAGA
80	St805_Contig_1	Maurolicus weitzmani	Seawater	2012-02-21	13:11:00	19-38	28.0052	-85.0002	80	USA: Gulf of Mexico	Multiple Opening/Closing Net Environmental Sensing Sytem (MOCNESS)	Fish eggs identified to mitochondrial barcoding gene (COI).	21	AGCTTTCTCGTGSGAGCAGAACTCAGCCRGCCCGGAGCTCTCCTGGGCGACGACCAGATCTACAACGTACTGGTCACAGCTCACGCCTTCGTAATAATTTTCTTTATAGTCATGCCTATTATAATTGGAGGCTTTGGGAACTGACTAATTCCCCTAATGATCGGGGCCCCAGACATAGCCTTTCCTCGAATAAACAACATAAGCTTCTGACTCCTGCCGCCCTCCTTCCTTCTCCTTTTAGCCTCCTCCGGGGTTGAAGCAGGCGCAGGAACTGGGTGAACCGTTTACCCTCCTCTTGCTAGCAACTTGGCCCACGCAGGGGCCTCTGTCGACCTTACCATTTTCTCGCTCCATCTCGCAGGTATTTCCTCAATCCTTGGAGCAATTAATTTTATTACC…
81	St805_Contig_2	Scomber colias	Seawater	2012-02-21	13:11:00	19-38	28.0052	-85.0002	80	USA: Gulf of Mexico	Multiple Opening/Closing Net Environmental Sensing Sytem (MOCNESS)	Fish eggs identified to mitochondrial barcoding gene (COI).	4	GGAANATTTGGCACGGGCTTAAGCTTGCTTATCCGAGCTAAACTAAGTCAACCAGGGTCCCTTCTCGGCGACGACCAAATCTACAACGTAATTGTTACGGCTCACGCCTTCGTTATAATCTTCTTTTTAGTAATGCCAGTTATGATTGGAGGGTTCGGAAACTGACTGATCCCCCTAATGATCGGAGCCCCCGACATGGCATTTCCCCGAATAAATAACATAAGCTTCTGACTTCTGCCCCCATCTCTCCTGCTGCTCCTGTCTTCTTCGGCAGTTGAAGCCGGTGCTGGAACTGGCTGAACAGTTTATCCTCCCCTCGCTGGGAACCTGGCACACGCCGGGGCATCAGTTGATTTAACCATCTTCTCACTCCACCTAGCAGGTGTTTCCTCAATCCTT…
82	St805_Contig_3	Scomber colias	Seawater	2012-02-21	13:11:00	19-38	28.0052	-85.0002	80	USA: Gulf of Mexico	Multiple Opening/Closing Net Environmental Sensing Sytem (MOCNESS)	Fish eggs identified to mitochondrial barcoding gene (COI).	4	TTGGTCTTTTAAAAACTAGTCAACCWGGGTCCCTTCTCGGCGACAACCAAATCTACAACGTAATTGTTACGGCTCACGCCTTCGTTATAATCTTCTTTTTAGTAATGCCAGTTATGATTGGAGGGTTCGGAAACTGACTGATCCCCCTAATGATCGGAGCCCCCGACATGGCATTTCCCCGAATAAATAACATAAGCTTCTGACTTCTGCCCCCATCTCTCCTGCTGCTCCTGTCTTCTTCGGCAGTTGAAGCCGGTGCTGGAACTGGCTGAACAGTTTATCCTCCCCTCGCTGGGAACCTGGCACACGCCGGGGCATCAGTTGATTTAACCATCTTCTCACTCCACCTAGCAGGTGTTTCCTCAATCCTTGGGGCCATTAACTTCATCACAACAATCA…
83	St805_Contig_4	Maurolicus weitzmani	Seawater	2012-02-21	13:11:00	19-38	28.0052	-85.0002	80	USA: Gulf of Mexico	Multiple Opening/Closing Net Environmental Sensing Sytem (MOCNESS)	Fish eggs identified to mitochondrial barcoding gene (COI).	4	TTTTTWAAAATCAGCCTGCCCGGAGCTCTCCTGGGCGACGACCAGATCTACAACGTACTGGTCACAGCTCACGCCTTCGTAATAATTTTCTTTATAGTCATGCCTATTATAATTGGAGGCTTTGGGAACTGACTAATTCCCCTAATGATCGGGGCCCCAGACATAGCCTTTCCTCGAATAAACAACATAAGCTTCTGACTCCTGCCGCCCTCCTTCCTTCTCCTTTTAGCCTCCTCCGGGGTTGAAGCAGGCGCAGGAACTGGGTGAACCGTTTACCCTCCTCTTGCTAGCAACTTGGCCCACGCAGGGGCCTCTGTCGACCTTACCATTTTCTCGCTCCATCTCGCAGGTATTTCCTCAATCCTTGGAGCAATTAATTTTATTACCACTATTATTAAC…
84	St805_Contig_6	Scomber colias	Seawater	2012-02-21	13:11:00	19-38	28.0052	-85.0002	80	USA: Gulf of Mexico	Multiple Opening/Closing Net Environmental Sensing Sytem (MOCNESS)	Fish eggs identified to mitochondrial barcoding gene (COI).	4	GGCTTGTCTTTTTAAAASTAAGTCAACCAGGGTCCCTTCTCGGCGACAACCAAATCTACAACGTAATTGTTACGGCTCACGCCTTCGTTATAATCTTCTTTTTAGTAATGCCAGTTATGATTGGAGGGTTCGGAAACTGACTGATCCCCCTAATGATCGGAGCCCCCGACATGGCATTTCCCCGAATAAATAACATAAGCTTCTGACTTCTGCCCCCATCTCTCCTGCTGCTCCTGTCTTCTTCGGCAGTTGAAGCCGGTGCTGGAACTGGCTGAACAGTTTATCCTCCCCTCGCTGGGAACCTGGCACACGCCGGGGCATCAGTTGATTTAACCATCTTCTCACTCCACCTAGCAGGTGTTTCCTCAATCCTTGGGGCCATTAACTTCATCACAACAA…
85	St806-40	Ariomma bondi	Seawater	2012-02-21	13:18:00	0-18	28.0052	-85.0002	80	USA: Gulf of Mexico	Multiple Opening/Closing Net Environmental Sensing Sytem (MOCNESS)	Fish eggs identified to mitochondrial barcoding gene (COI).	1	ATTTGGTGCATGAGGCTGGAATAGTATGTACAGCCTTAAGCCTACTCATCCGAGCTGAACTAAACCAACCAGGCGCCCTTCTTGGGGACGACCAAATCTATAACGTAATCGTTACAGCACACGCCTTCGTAATAATTTTCTTTATAGTAATACCAATCATAATTGGAGGATTTGGAAACTGGCTCATCCCACTAATGATCGGGGCCCCAGACATAGCATTCCCTCGAATAAACAACATGAGCTTCTGACTTCTACCTCCTTCTTTCCTACTTCTCCTAGCCTCTTCTGGGGTTGAAGCCGGTGCCGGAACTGGATGGACAGTGTATCCTCCCCTAGCCGGCAATCTAGCACACGCTGGAGCATCAGTCGACCTAACTATTTTTTCTCTTCATCTCGCAG…
86	St806	Maurolicus weitzmani	Seawater	2012-02-21	13:18:00	0-18	28.0052	-85.0002	80	USA: Gulf of Mexico	Multiple Opening/Closing Net Environmental Sensing Sytem (MOCNESS)	Fish eggs identified to mitochondrial barcoding gene (COI).	8	GGGATAGTCGGCACAGCCGTAAGCCTGCTCATTCKAGCAGAACTCAGCCAGCCCGGAGCTCTCCTGGGCGACGACCAGATCTACAACGTACTGGTCACAGCTCACGCCTTCGTAATAATTTTCTTTATAGTCATGCCTATTATAATTGGAGGCTTTGGGAACTGACTAATTCCCCTAATGATCGGGGCCCCAGACATAGCCTTTCCTCGAATAAACAACATAAGCTTCTGACTCCTGCCGCCCTCCTTCCTTCTCCTTTTAGCCTCCTCCGGGGTTGAAGCAGGCGCAGGAACTGGGTGAACCGTTTACCCTCCTCTTGCTAGCAACTTGGCCCACGCAGGGGCCTCTGTCGACCTTACCATTTTCTCGCTCCATCTCGCAGGTATTTCCTCAATCCTT…
87	St861-7	Scomber colias	Seawater	2012-02-22	10:01:00	100-125	27.5025	-84.4913	86	USA: Gulf of Mexico	Multiple Opening/Closing Net Environmental Sensing Sytem (MOCNESS)	Fish eggs identified to mitochondrial barcoding gene (COI).	1	AAACTAAGTCAACCAGGGTCCCTTCTCGGCGACGACCAAATCTACAACGTAATTGTTACGGCTCACGCCTTCGTTATAATCTTCTTTTTAGTAATGCCAGTTATGATTGGAGGGTTCGGAAACTGACTGATCCCCCTAATGATCGGAGCCCCCGACATGGCATTTCCCCGAATAAATAACATAAGCTTCTGACTTCTGCCCCCATCTCTCCTGCTGCTCCTGTCTTCTTCGGCAGTTGAAGCCGGTGCTGGAACTGGCTGAACAGTTTATCCTCCCCTCGCTGGGAACCTGGCACACGCCGGGGCATCAGTTGATTTAACCATCTTCTCACTCCACCTAGCAGGTGTTTCCTCAATCCTTGGGGCCATTAACTTCATCACAACAATCATTAACATAAAA…
88	St861-19	Prionotus stearnsi	Seawater	2012-02-22	10:01:00	100-125	27.5025	-84.4913	86	USA: Gulf of Mexico	Multiple Opening/Closing Net Environmental Sensing Sytem (MOCNESS)	Fish eggs identified to mitochondrial barcoding gene (COI).	1	CTTTTAAAAGCTAAGTCAACCCGGCCCCCTCCTAGGCGACGACCAACTTTACAACGTAATCGTTACGGCGCATGCTTTTGTAATAATCTTTTTTATAGTAATGCCTGTAATAATTGGAGGCTTTGGAAACTGACTTATTCCCCTAATGATCGGGGCCCCCGACATGGCCTTTCCTCGAATAAATAACATGAGCTTCTGACTTCTTCCCCCCTCCTTCCTACTCCTGCTTACATCCTCCGCCGTAGAAGCTGGGGCAGGCACAGGATGGACCGTCTATCCCCCTCTCGCCGGAAACCTCGCCCACGCAGGAGCCTCCGTGGACCTTGCAATTTTTTCACTCCATCTAGCAGGTATTTCTTCAATCTTAGGGGCCATTAACTTTATTACAACAATTTTTAA…
89	St861_Contig_2	Citharichthys cornutus	Seawater	2012-02-22	10:01:00	100-125	27.5025	-84.4913	86	USA: Gulf of Mexico	Multiple Opening/Closing Net Environmental Sensing Sytem (MOCNESS)	Fish eggs identified to mitochondrial barcoding gene (COI).	5	GTTGAAAACTTAGTCAACCAGGAGCCCTACTCGGGGATGACCAAATCTATAATGTTATTGTTACGGCTCATGCTTTTGTAATAATTTTCTTTATAGTAATGCCTATTATGATTGGGGGCTTTGGAAACTGATTAATCCCCCTAATAATTGGGGCCCCCGATATAGCATTTCCACGAATAAATAATATGAGTTTCTGACTTCTACCTCCCTCTTTCCTTTTACTTTTAGCCTCTTCTGGTGTAGAAGCAGGAGCAGGTACAGGTTGAACAGTATACCCGCCGCTGGCCGGAAATCTAGCCCATGCTGGAGCATCCGTAGATCTTACTATTTTTTCCCTTCATCTTGCAGGTATTTCATCTATTCTTGGGGCTATTAACTTTATTACGACTATTATTAACA…
90	St861_Contig_4	Saurida brasiliensis	Seawater	2012-02-22	10:01:00	100-125	27.5025	-84.4913	86	USA: Gulf of Mexico	Multiple Opening/Closing Net Environmental Sensing Sytem (MOCNESS)	Fish eggs identified to mitochondrial barcoding gene (COI).	3	TTATCTAGTATTTGGTGCATGAGCCGGATAGTGGGCACTGCCCTAAGTTTACTTATCCGAGCCGAATTAAGCCAACCCGGTGCCCTATTAGGGGACGATCAAATCTACAACGTAATTGTTACCGC
91	St861_Contig_5	Pagrus pagrus	Seawater	2012-02-22	10:01:00	100-125	27.5025	-84.4913	86	USA: Gulf of Mexico	Multiple Opening/Closing Net Environmental Sensing Sytem (MOCNESS)	Fish eggs identified to mitochondrial barcoding gene (COI).	2	AGCTGAGTTAGCCAGCCCGGGGCTCTCCTAGGCGACGACCAGATTTATAATGTTATTGTTACAGCACACGCGTTTGTAATAATTTTCTTTATAGTTATACCAATTATGATTGGAGGCTTTGGGAACTGATTAATTCCACTTATGATTGGTGCCCCTGACATAGCATTCCCCCGAATGAACAACATGAGTTTCTGACTGCTCCCTCCCTCATTCCTTCTCCTACTTGCCTCCTCAGGAGTTGAAGCCGGAGCTGGCACCGGATGAACGGTTTATCCGCCACTAGCTGGGAATCTTGCCCACGCAGGAGCATCAGTAGACCTAACCATCTTTTCTCTCCACTTAGCTGGAATTTCATCAATTCTTGGTGCAATCAATTTTATTACTACYATTATCAACATG…
92	St861_Contig_6	Caulolatilus cyanops	Seawater	2012-02-22	10:01:00	100-125	27.5025	-84.4913	86	USA: Gulf of Mexico	Multiple Opening/Closing Net Environmental Sensing Sytem (MOCNESS)	Fish eggs identified to mitochondrial barcoding gene (COI).	2	TCATCTTAGCAGAACTCAGCCAACCAGGCGCCCTGCTCGGTGACGATCAAATTTACAATGTTATTGTTACTGCGCATGCCTTTGTAATAATCTTCTTCATAGTTATACCAATCATGATCGGAGGCTTCGGAAACTGACTAATCCCCCTAATAATCGGAGCCCCAGACATGGCATTCCCTCGAATAAACAACATAAGCTTCTGGCTCTTACCCCCCTCATTTTTACTGCTTCTGGCTTCCTCTGGAGTAGAAGCAGGAGCCGGGACAGGATGGACTGTTTACCCTCCCTTAGCGGGCAACCTAGCGCATGCTGGAGCATCTGTCGACCTAACCATCTTCTCCCTTCACCTGGCAGGGATTTCCTCAATTTTAGGAGCCATCAACTTCATCACAACCATTG…
93	St862-2	Synodus poeyi	Seawater	2012-02-22	10:08:00	81-100	27.5025	-84.4913	86	USA: Gulf of Mexico	Multiple Opening/Closing Net Environmental Sensing Sytem (MOCNESS)	Fish eggs identified to mitochondrial barcoding gene (COI).	1	CGGGGGCCCTTTTAGGGGACGACCAGATCTATAACGTTATCGTTACAGCCCATGCTTTTGTTATAATCTTTTTTATAGTGATACCGATTATAATCGGGGGATTCGGAAACTGGTTAATCCCCTTAATGATCGGCGCCCCAGATATGGCCTTCCCTCGAATAAACAATATAAGCTTTTGGCTTCTCCCCCCCTCTTTCCTACTCCTCTTGGCCTCTTCGGGTGTCGAAGCCGGGGCAGGAACGGGGTGGACCGTTTACCCCCCCTTAGCAGGAAATTTGGCCCACGCTGGGGCTTCAGTGGATCTAACAATTTTTTCTCTGCACTTGGCAGGAATCTCATCTATTTTAGGGGCAATCAACTTTATTACAACTATTATTAACATGAAGCCTCCCGCTGTCT…
94	St862-4	Etrumeus sadina	Seawater	2012-02-22	10:08:00	81-100	27.5025	-84.4913	86	USA: Gulf of Mexico	Multiple Opening/Closing Net Environmental Sensing Sytem (MOCNESS)	Fish eggs identified to mitochondrial barcoding gene (COI).	1	GCTAAGCCAGCCTGGAGCCTTGTTAGGCGATGACCAAATTTATAACGTAATTGTTACTGCACATGCCTTTGTTATGATTTTCTTCATAGTAATGCCAATTTTAATTGGCGGGTTCGGAAACTGACTAGTACCCCTTATGCTTGGGGCACCAGACATGGCATTCCCTCGAATAAATAACATAAGCTTTTGACTTCTTCCCCCTTCCTTTCTTCTCTTGCTCGCCTCATCTGGAGTTGAAGCCGGAGCAGGAACCGGATGGACTGTCTATCCCCCTCTAGCAGGTAATCTCGCCCACGCAGGAGCATCTGTTGACTTAACTATTTTCTCACTCCACCTGGCAGGGATTTCTTCAATTCTTGGGGCAATCAATTTTATTACCACAATTATTAACATAAAACC…
95	St862-5	Serranus notospilus	Seawater	2012-02-22	10:08:00	81-100	27.5025	-84.4913	86	USA: Gulf of Mexico	Multiple Opening/Closing Net Environmental Sensing Sytem (MOCNESS)	Fish eggs identified to mitochondrial barcoding gene (COI).	1	TACTAAGAGACGACAAAATCTATAATGTAATCGTGACAGCCCATGCTTTCGTAATAATCTTCTTCATAGTTATGCCAATTATGATTGGAGGCTTTGGCAACTGACTAATCCCCCTTATAATTGGAGCCCCTGACATAGCATTCCCACGAATAAATAATATGAGCTTTTGGCTTCTCCCTCCCTCCTTCCTCCTCCTCCTAGCCTCTTCAGGGGTTGAAGCAGGGGCCGGAACCGGATGAACAGTGTATCCCCCTCTCGCTGGAAATCTAGCCCATGCTGGAGCTTCCGTTGATTTAACAATTTTTTCCCTACACCTAGCAGGTGTTTCCTCAATTTTAGGAGCTATTAATTTTATTACTACTATTATTAATATGAAACCCCCTGCCATCTCTCAATACC…
96	St862-31	Hoplunnis macrura	Seawater	2012-02-22	10:08:00	81-100	27.5025	-84.4913	86	USA: Gulf of Mexico	Multiple Opening/Closing Net Environmental Sensing Sytem (MOCNESS)	Fish eggs identified to mitochondrial barcoding gene (COI).	1	TTAGCCAACCAGGGGCCCTACTTGGAGATGACCAAATTTATAATGTTATCGTCACAGCACATGCCTTCGTAATAATCTTCTTTATAGTAATACCAGTTATAATCGGAGGATTCGGCAACTGATTGATCCCCCTAATAATCGGGGCCCCAGATATAGCATTCCCCCGAATGAACAACATAAGCTTCTGGCTCCTACCACCATCATTTCTGCTACTTTTGGCCTCTTCAGGGGTTGAAGCTGGAGCAGGAACAGGCTGAACTGTCTATCCCCCTCTAGCAGGAAACCTGGCCCACGCTGGAGCATCAGTCGATTTAACAATCTTCTCCCTGCATTTAGCAGGAGTCTCCTCAATTCTAGGAGCCATTAACTTCATTACCACCATTATTAACATGAAACCAC…
97	St862_Contig_2	Citharichthys cornutus	Seawater	2012-02-22	10:08:00	81-100	27.5025	-84.4913	86	USA: Gulf of Mexico	Multiple Opening/Closing Net Environmental Sensing Sytem (MOCNESS)	Fish eggs identified to mitochondrial barcoding gene (COI).	5	AAAAACTTAGTCAACCAGGAGCCCTACTCGGGGATGACCAAATCTATAATGTTATTGTTACGGCTCATGCTTTTGTAATAATTTTCTTTATAGTAATGCCTATTATGATTGGGGGCTTTGGAAACTGATTAATCCCCCTAATAATTGGGGCCCCCGATATAGCATTTCCACGAATAAATAATATGAGTTTCTGACTTCTACCTCCCTCTTTCCTTTTACTTTTAGCCTCTTCTGGTGTAGAAGCAGGAGCAGGTACAGGTTGAACAGTATACCCGCCGCTGGCCGGRAATCTAGCCCATGCTGGAGCATCCGTAGATCTTACTATTTTTTCCCTTCATCTTGCAGGTATTTCATCTATTCTTGGGGCTATTAACTTTATTACGACTATTATTAACATAA…
98	St862_Contig_4	Serranus notospilus	Seawater	2012-02-22	10:08:00	81-100	27.5025	-84.4913	86	USA: Gulf of Mexico	Multiple Opening/Closing Net Environmental Sensing Sytem (MOCNESS)	Fish eggs identified to mitochondrial barcoding gene (COI).	3	TTTGAAAGCTAAGCCAACCCGGCGCTCTCCTAGGAGACGACCAAATCTATAATGTAATCGTGACAGCCCATGCTTTCGTAATAATCTTCTTCATAGTTATGCCAATTATGATTGGAGGCTTTGGCAACTGACTAATCCCCCTTATAATTGGAGCCCCTGACATAGCATTCCCACGAATAAATAATATGAGCTTTTGGCTTCTCCCTCCCTCCTTCCTCCTCCTCCTAGCCTCTTCAGGGGTTGAAGCAGGGGCCGGAACCGGATGAACAGTGTATCCCCCTCTCGCTGGAAATCTAGCCCATGCTGGAGCTTCCGTTGATTTAACAATTTTTTCCCTACACCTAGCAGGTGTTTCCTCAATTTTAGGAGCTATTAATTTTATTACTACTATTATTAATA…
99	St864-12	Prionotus paralatus	Seawater	2012-02-22	10:26:00	40-60	27.5025	-84.4913	86	USA: Gulf of Mexico	Multiple Opening/Closing Net Environmental Sensing Sytem (MOCNESS)	Fish eggs identified to mitochondrial barcoding gene (COI).	1	CTGGCCCCCTTTTGGGCGACGACCAACTTTATAATGTTATCGTAACAGCACATGCTTTTGTAATAATCTTTTTTATGGTAATACCCATCATGATTGGGGGATTTGGAAACTGACTTATTCCCTTAATGATTGGGGCCCCTGACATGGCTTTCCCTCGGATAAATAATATGAGCTTCTGATTACTCCCGCCTTCTTTTCTTCTTCTGCTCACCTCCTCTGCTGTAGAAGCCGGGGCGGGCACAGGATGAACCGTTTATCCCCCCCTTGCCGGAAATCTCGCCCACGCAGGAGCCTCTGTAGATTTGGCAATTTTTTCGCTTCATCTCGCAGGGATCTCCTCAATCCTAGGGGCCATTAATTTCATTACAACTATTTTTAACATGAAACCGCCTGCCATAA…
100	St864-15	Saurida brasiliensis	Seawater	2012-02-22	10:26:00	40-60	27.5025	-84.4913	86	USA: Gulf of Mexico	Multiple Opening/Closing Net Environmental Sensing Sytem (MOCNESS)	Fish eggs identified to mitochondrial barcoding gene (COI).	1	GCCCTGAGTTTACTTATCCGAGCCGAATTAAGCCAACCCGGTGCCCTATTAGGGGACGATCAAATCTACAACGTAATTGTTACCGC
101	St864-16	Serranus notospilus	Seawater	2012-02-22	10:26:00	40-60	27.5025	-84.4913	86	USA: Gulf of Mexico	Multiple Opening/Closing Net Environmental Sensing Sytem (MOCNESS)	Fish eggs identified to mitochondrial barcoding gene (COI).	1	AAAGCTGAGCCAACCCGGCGCTCTCCTAGGAGACGACCAAATCTATAATGTAATCGTGACAGCCCATGCTTTCGTAATAATCTTCTTCATAGTTATGCCAATTATGATTGGAGGCTTTGGCAACTGACTAATCCCCCTTATAATTGGAGCCCCTGACATAGCATTCCCACGAATGAATAATATGAGCTTTTGGCTTCTCCCTCCCTCCTTCCTCCTCCTCCTAGCCTCTTCAGGGGTTGAAGCAGGGGCCGGAACCGGATGGACAGTGTATCCCCCTCTCGCTGGTAATCTAGCCCATGCTGGAGCTTCCGTTGATTTAACAATTTTTTCCCTACACCTAGCAGGTGTTTCCTCAATTTTAGGAGCTATTAATTTTATTACTACTATTATTAATATGAA…
102	St864-20	Synodus poeyi	Seawater	2012-02-22	10:26:00	40-60	27.5025	-84.4913	86	USA: Gulf of Mexico	Multiple Opening/Closing Net Environmental Sensing Sytem (MOCNESS)	Fish eggs identified to mitochondrial barcoding gene (COI).	1	CTCAGCCAGCCGGGGGCCCTTTTAGGGGACGACCAGATCTATAACGTTATCGTTACAGCCCATGCTTTTGTTATAATCTTTTTTATAGTGATACCGATTATAATCGGGGGATTCGGAAACTGGTTAATCCCCTTAATGATCGGCGCCCCAGATATGGCCTTCCCTCGAATAAACAATATAAGCTTTTGGCTTCTCCCCCCCTCTTTCCTACTCCTCTTGGCCTCTTCGGGTGTCGAAGCCGGGGCAGGAACGGGGTGGACCGTTTACCCCCCCTTAGCAGGAAATTTGGCCCACGCTGGGGCTTCAGTGGATCTAACAATTTTTTCTCTGCACTTGGCAGGAATCTCATCTATTTTAGGGGCAATCAACTTTATTACAACTATTATTAACATGAAGCCT…
103	St864-22	Saurida brasiliensis	Seawater	2012-02-22	10:26:00	40-60	27.5025	-84.4913	86	USA: Gulf of Mexico	Multiple Opening/Closing Net Environmental Sensing Sytem (MOCNESS)	Fish eggs identified to mitochondrial barcoding gene (COI).	1	GCCCTAAGTTTACTTATCCGAGCCGAATTAAGCCAACCCGGTGCCCTATTAGGGGACGATCAAATCTACAACGTAATTGTTACCGC
104	St864-29	Decapterus macarellus	Seawater	2012-02-22	10:26:00	40-60	27.5025	-84.4913	86	USA: Gulf of Mexico	Multiple Opening/Closing Net Environmental Sensing Sytem (MOCNESS)	Fish eggs identified to mitochondrial barcoding gene (COI).	1	TTATTCGGGCAAAACTAAGCCAACCTGGCGCCCTTCTAGGGGATGACCAAATTTACAACGTAATTGTTACGGCCCACGCTTTCGTAATAATTTTCTTTATAGTAATGCCAATTATGATTGGAGGCTTTGGAAACTGACTGATTCCGCTAATGATCGGGGCCCCTGATATAGCCTTCCCTCGAATGAATAACATGAGCTTCTGACTACTCCCTCCTTCCTTCCTCTTGCTTTTAGCCTCTTCAGGGGTTGAAGCCGGGGCCGGAACTGGTTGAACAGTCTATCCCCCACTGGCTGGGAACCTTGCCCACGCCGGAGCGTCCGTAGACTTAACCATCTTCTCCCTTCACCTAGCAGGGGTCTCGTCAATTCTAGGGGCTATTAATTTTATTACCACTATTA…
105	St864-35	Scomber colias	Seawater	2012-02-22	10:26:00	40-60	27.5025	-84.4913	86	USA: Gulf of Mexico	Multiple Opening/Closing Net Environmental Sensing Sytem (MOCNESS)	Fish eggs identified to mitochondrial barcoding gene (COI).	1	TTGGCGGGGCCGTAAGCTTGCGTATCCGAGCTGAACTAAGTCAACCAGGGTCCCTTCTCGGCGACGACCAAATCTACAACGTATTTGTTACGGCTCACGCCTTCTTTATAATCATCTTTTTAGTAATGCCAGTTATGATTGGAGGGTTCGGAAACTGACTGATCCCCCTAATGATCGGAGCCCCCGACATGGCATTTCCCCGAATAAATAACATAAGCTTCTGACTTCTGCCCCCATCTCTCCTGCTGCTCCTGTCTTCTTCGGCAGTTGAAGCCGGTGCTGGAACTGGCTGAACAGTTTATCCTCCCCTCGCTGGGAACCTGGCACACGCCGGGGCATCAGTTGATTTAACCATCTTCTCACTCCACCTAGCAGGTGTTTCCTCAATCCTTGGGGCCA…
106	St864-44	Saurida brasiliensis	Seawater	2012-02-22	10:26:00	40-60	27.5025	-84.4913	86	USA: Gulf of Mexico	Multiple Opening/Closing Net Environmental Sensing Sytem (MOCNESS)	Fish eggs identified to mitochondrial barcoding gene (COI).	1	GGGCACTGCCCTAAGTTTACTTATCCGAGCCGAATTAAGCCAACCCGGTGCCCTATTAGGGGACGATCAAATCTACAACGTAATTGTTACCGC
107	St864_Contig_1	Saurida brasiliensis	Seawater	2012-02-22	10:26:00	40-60	27.5025	-84.4913	86	USA: Gulf of Mexico	Multiple Opening/Closing Net Environmental Sensing Sytem (MOCNESS)	Fish eggs identified to mitochondrial barcoding gene (COI).	8	TTGGTGCATGAGCCGGATAGTGGGCACTGCCCTAAGTTTACTTATCCGAGCCGAATTAAGCCAACCCGGTGCCCTATTAGGGGACGATCAAATCTACAACGTAATTGTTACCGC
108	St864_Contig_3	Pagrus pagrus	Seawater	2012-02-22	10:26:00	40-60	27.5025	-84.4913	86	USA: Gulf of Mexico	Multiple Opening/Closing Net Environmental Sensing Sytem (MOCNESS)	Fish eggs identified to mitochondrial barcoding gene (COI).	2	TTATTCGAGCTGAGCTTAGCCAGCCCGGGGCTCTCCTAGGCGACGACCAGATTTATAATGTTATTGTTACAGCACACGCGTTTGTAATAATTTTCTTTATAGTTATACCAATTATGATTGGAGGCTTTGGGAACTGATTAATTCCACTTATGATTGGTGCCCCTGACATAGCATTCCCCCGAATGAACAACATGAGTTTCTGACTGCTCCCTCCCTCATTCCTTCTCCTACTTGCCTCCTCAGGAGTTGAAGCCGGAGCTGGCACCGGATGAACGGTTTATCCGCCACTAGCTGGGAATCTTGCCCACGCAGGAGCATCAGTAGACCTAACCATCTTTTCYCTCCACTTAGCTGGAATTTCATCAATTCTTGGTGCAATCAATTTTATTACTACCATTA…
109	St865-6	Mycteroperca microlepis	Seawater	2012-02-22	10:34:00	20-39	27.5025	-84.4913	86	USA: Gulf of Mexico	Multiple Opening/Closing Net Environmental Sensing Sytem (MOCNESS)	Fish eggs identified to mitochondrial barcoding gene (COI).	1	AGCCCTACTAGGCGACGATCAAATCTATAACGTAATTGTTACAGCACACGCCTTCGTAATAATTTTCTTTATAGTAATACCAATTATGATTGGTGGCTTTGGAAACTGACTCATCCCACTTATAATCGGTGCCCCTGATATAGCATTCCCTCGAATGAATAACATAAGCTTCTGACTTCTTCCCCCATCTTTCCTGCTCCTTCTCGCCTCCTCTGGCGTAGAAGCCGGAGCCGGTACCGGTTGAACGGTGTATCCTCCCTTAGCTGGAAACTTAGCCCATGCAGGGGCATCTGTAGACTTAACCATTTTCTCCCTGCATTTAGCAGGAATTTCATCAATTCTAGGAGCAATTAACTTTATCACAACCATTATTAATATAAAACCCCCGGCTATCTCTCA…
110	St865-15	Prionotus alatus	Seawater	2012-02-22	10:34:00	20-39	27.5025	-84.4913	86	USA: Gulf of Mexico	Multiple Opening/Closing Net Environmental Sensing Sytem (MOCNESS)	Fish eggs identified to mitochondrial barcoding gene (COI).	1	CCCCCTTTTGGGCGACCACCAACTTTATAATGTTATCGTAACAGCACATGCTTTTGTAATAATTTTTTTTATGGTAATACCCATCATGATTGGGGGATTTGGAAACTGACTTATTCCCTTAATGATTGGGGCCCCTGACATGGCTTTCCCTCGGATGAATAATATGAGCTTCTGATTACTCCCGCCTTCTTTCCTTCTTCTGCTCACCTCCTCTGCTGTAGAAGCCGGGGCGGGCACAGGATGAACCGTTTATCCCCCCCTTGCCGGAAATCTCGCCCACGCAGGAGCCTCTGTAGATTTGGCAATTTTTTCGCTTCATCTCGCAGGGATCTCCTCAATCTTAGGGGCCATTAATTTTATTACAACTATTTTTAACATGAAACCGCCTGCCATAACCCC…
111	St865-19	Prionotus alatus	Seawater	2012-02-22	10:34:00	20-39	27.5025	-84.4913	86	USA: Gulf of Mexico	Multiple Opening/Closing Net Environmental Sensing Sytem (MOCNESS)	Fish eggs identified to mitochondrial barcoding gene (COI).	1	TTTATAATGTTATCGTACCATCACATGCTTTTGTAATAATCTTTTTTATGGTAATACTTACTTGTGAGGGGGATTTGGAAACTGACTTATTCCCTTAATGATTGGGGCCCCTGACATGGCTTTCCCTCGGATGAATAAAATGAGCTTCTGATTACTCCCGCCTTCTTTCCTTCTTCTGCTCACCTCCTCTGCTGTATAAACCGGGGCGGGCACAGGATAAACCGTTTATCCCCCCCTTGGCGGAAATCTCGCCCACGCAGGAGCCTCTGTAGATTTGGCAATTTTTTCGCTTCATCTCGCAGGGATCTCCTCAATCCTAGGGGCCATTAATTTTATTACAACTATTTTTAACATGAAACCGCCTGCCATAACCCCCTACCAAATACCCCTCTTTGTTTG…
112	St865-38	Saurida brasiliensis	Seawater	2012-02-22	10:34:00	20-39	27.5025	-84.4913	86	USA: Gulf of Mexico	Multiple Opening/Closing Net Environmental Sensing Sytem (MOCNESS)	Fish eggs identified to mitochondrial barcoding gene (COI).	1	AGTGGGCACTGCCCTAAGTTTACTTATCCGAGCCGAATTAAGCCAACCCGGTGCCCTATTAGGGGACGATCAAATCTACAACGTAATTGTTACCGC
113	St865-46	Scomber colias	Seawater	2012-02-22	10:34:00	20-39	27.5025	-84.4913	86	USA: Gulf of Mexico	Multiple Opening/Closing Net Environmental Sensing Sytem (MOCNESS)	Fish eggs identified to mitochondrial barcoding gene (COI).	1	TTGTTGACGGGAATGACTAAGTCAACCAGGGTCCCTTCTCGGCGACGACCAAATCTACAACGTAATTGTTACGGCTCACGCCTTCGTTATAATCTTCTTTTTAGTAATGCCAGTTATGATTGGAGGGTTCGGAAACTGACTGATCCCCCTAATGATCGGAGCCCCCGACATGGCATTTCCCCGAATAAATAACATAAGCTTCTGACTTCTGCCCCCATCTCTCCTGCTGCTCCTGTCTTCTTCGGCAGTTGAAGCCGGTGCTGGAACTGGCTGAACAGTTTATCCTCCCCTCGCTGGGAACCTGGCACACGCCGGGGCATCAGTTGATTTAACCATCTTCTCACTCCACCTAGCAGGTGTTTCCTCAATCCTTGGGGCCATTAACTTCATCACAACAAT…
114	St865_Contig_1	Saurida brasiliensis	Seawater	2012-02-22	10:34:00	20-39	27.5025	-84.4913	86	USA: Gulf of Mexico	Multiple Opening/Closing Net Environmental Sensing Sytem (MOCNESS)	Fish eggs identified to mitochondrial barcoding gene (COI).	15	TTGGTGCATGAGCCGGATAGTGGGCACTGCCCTAAGTTTACTTATCCGAGCCGAATTAAGCCAACCCGGTGCCCTATTAGGGGACGATCAAATCTACAACGTAATTGTTACCGC
115	St865_Contig_2	Scomber colias	Seawater	2012-02-22	10:34:00	20-39	27.5025	-84.4913	86	USA: Gulf of Mexico	Multiple Opening/Closing Net Environmental Sensing Sytem (MOCNESS)	Fish eggs identified to mitochondrial barcoding gene (COI).	3	GGGCGTGAGCTTGCTTATCCGAGCTGAACTAAGTCAACCAGGGTCCCTTCTCGGCGACGACCAAATCTACAACGTAATTGTTACGGCTCACGCCTTCGTTATAATCTTCTTTTTAGTAATGCCAGTTATGATTGGAGGGTTCGGAAACTGACTGATCCCCCTAATGATCGGAGCCCCCGACATGGCATTTCCCCGAATAAATAACATAAGCTTCTGACTTCTGCCCCCATCTCTCCTGCTGCTCCTGTCTTCTTCGGCAGTTGAAGCCGGTGCTGGAACTGGCTGAACAGTTTATCCTCCCCTCGCTGGGAACCTGGCACACGCCGGGGCATCAGTTGATTTAACCATCTTCTCACTCCACCTAGCAGGTGTTTCCTCAATCCTTGGGGCCATTAACTT…
116	St865_Contig_4	Saurida brasiliensis	Seawater	2012-02-22	10:34:00	20-39	27.5025	-84.4913	86	USA: Gulf of Mexico	Multiple Opening/Closing Net Environmental Sensing Sytem (MOCNESS)	Fish eggs identified to mitochondrial barcoding gene (COI).	2	TGCTGAACTCAGCCAGCCAGGGGCCCTTCTTGGAGATGACCAAATTTATAACGTTATTGTTACTGCCCACGCGTTCGTTATAATTTTCTTTATAGTAATACCAATTATAATTGGGGGCTTCGGAAACTGACTCATCCCCCTTATAATTGGCGCCCCAGACATGGCATTTCCCCGCATGAATAACATAAGCTTCTGACTCCTGCCTCCTTCCTTCCTCCTCCTCCTCGCATCCTCAGGTGTAGAGGCTGGAGCCGGGACCGGATGGACCGTTTATCCGCCCCTAGCGGGAAATCTAGCCCATGCCGGGGCATCGGTTGACCTAACCATTTTTTCTCTTCATCTGGCGGGAATTTCCTCAATTCTTGGGGCTATCAACTTTATTACCACAATTATTAACAT…
117	St865_Contig_5	Synodus poeyi	Seawater	2012-02-22	10:34:00	20-39	27.5025	-84.4913	86	USA: Gulf of Mexico	Multiple Opening/Closing Net Environmental Sensing Sytem (MOCNESS)	Fish eggs identified to mitochondrial barcoding gene (COI).	2	GGCTTTTAGTCCGGGCCGAACTCAGCCAGCCGGGGGCCCTTTTAGGGGACGACCAGATCTATAACGTTATCGTTACAGCCCATGCTTTTGTTATAATCTTTTTTATAGTGATACCAATTATAATCGGGGGATTCGGAAACTGGTTAATCCCCTTAATGATCGGCGCCCCAGATATGGCCTTCCCTCGAATAAACAATATAAGCTTTTGGCTTCTCCCCCCCTCTTTCCTACTCCTCTTGGCCTCTTCGGGTGTCGAAGCCGGGGCAGGAACGGGGTGGACCGTTTACCCCCCCTTAGCAGGAAATTTGGCCCACGCTGGGGCTTCAGTGGATCTAACAATTTTTTCTCTGCACTTGGCAGGAATCTCATCTATTTTAGGGGCAATCAACTTTATTACAA…
118	St865_Contig_6	Bellator egretta	Seawater	2012-02-22	10:34:00	20-39	27.5025	-84.4913	86	USA: Gulf of Mexico	Multiple Opening/Closing Net Environmental Sensing Sytem (MOCNESS)	Fish eggs identified to mitochondrial barcoding gene (COI).	2	AAAACTAAGTCAACCGGGGCCTCTCCTGGGCGACGACCAGCTTTACAATGTTATCGTCACCGCACACGCCTTTGTAATAATTTTCTTTATGGTAATGCCAATCATAATTGGGGGGTTTGGAAACTGACTGATCCCCTTAATAATTGGGGCCCCTGACATAGCTTTCCCCCGAATAAATAACATAAGCTTCTGACTTCTCCCCCCTTCCTTCCTCCTGCTCCTAACATCTTCAGCCGTAGAAGCTGGGGCTGGGACAGGTTGAACTGTTTACCCCCCTCTCGCCGGCAACCTCGCCCATGCAGGGGCCTCCGTAGA
119	St865_Contig_7	Saurida brasiliensis	Seawater	2012-02-22	10:34:00	20-39	27.5025	-84.4913	86	USA: Gulf of Mexico	Multiple Opening/Closing Net Environmental Sensing Sytem (MOCNESS)	Fish eggs identified to mitochondrial barcoding gene (COI).	2	GCCCTAAGTTTACTTATCCGAGCCGAATTAAGCCAACCCGGTGCCCTATTAGGGGACGATCAAATCTACAACGTAATTGTTACCGC
120	St866-21	Etrumeus sadina	Seawater	2012-02-22	10:42:00	0-20	27.5025	-84.4913	86	USA: Gulf of Mexico	Multiple Opening/Closing Net Environmental Sensing Sytem (MOCNESS)	Fish eggs identified to mitochondrial barcoding gene (COI).	1	AGCCTTGTTAGGCGATGACCAAATTTATAACGTAATTGTTACTGCACATGCCTTTGTTATGATTTTCTTCATAGTAATGCCAATTTTAATTGGCGGGTTCGGAAACTGACTAGTACCCCTTATGCTTGGGGCACCAGACATGGCATTCCCTCGAATAAATAACATAAGCTTTTGACTTCTTCCCCCTTCCTTTCTTCTCTTGCTCGCCTCATCTGGAGTTGAAGCCGGAGCAGGAACCGGATGGACTGTCTATCCCCCTCTAGCAGGTAATCTCGCCCACGCAGGAGCATCTGTTGACTTAACTATTTTCTCACTCCACCTGGCAGGGATTTCTTCAATTCTTGGGGCAATCAATTTTATTACCACAATTATTAACATAAAACCTCCCGCAGTCTCTCA…
121	St866-25	Trachipterus sp.	Seawater	2012-02-22	10:42:00	0-20	27.5025	-84.4913	86	USA: Gulf of Mexico	Multiple Opening/Closing Net Environmental Sensing Sytem (MOCNESS)	Fish eggs identified to mitochondrial barcoding gene (COI).	1	TTGATTGGTGCAAAATTAAGTCAACCTGGGGCTCTCCTTGGGGACGATCAGATCTACAATGTAATTGTTACCGCTCACGCTTTTGTTATAATTTTTTTTATAGTAATGCCTATTATGATTGGGGGCTTTGGCAACTGACTAATTCCCCTTATGATTGGGGCACCCGATATGGCTTTCCCACGAATAAATAATATAAGCTTCTGACTTCTCCCCCCCTCGTTCCTCCTCCTATTAGCCTCTTCCGGAGTCGAAGCTGGGGCGGGTACTGGTTGAACTGTGTATCCCCCCCTAGCAGGTAACTTAGCCCATGCAGGAGCTTCAGTTGATCTGACAATCTTCTCACTTCATCTTGCAGGCGTCTCTTCGATTTTAGGTGCCATTAATTTTATTACCACTATT…
122	St866-32	Priacanthus arenatus	Seawater	2012-02-22	10:42:00	0-20	27.5025	-84.4913	86	USA: Gulf of Mexico	Multiple Opening/Closing Net Environmental Sensing Sytem (MOCNESS)	Fish eggs identified to mitochondrial barcoding gene (COI).	1	TCCTCATCGGCGCAAAGCTCAGCCAACCCGGCTCTCTTCTCGGGGACGATCAAATTTACAATGTCATTGTTACAGCCCACGCATTTGTAATAATCTTCTTTATAGTAATACCTGTAATAATTGGGGGCTTCGGCAATTGGCTCATCCCCCTAATGATTGGAGCACCCGACATAGCATTCCCCCGAATGAACAACATAAGCTTCTGACTTCTCCCACCCTCTTTCCTCCTTCTACTAACCTCTTCAGCAGTAGAAGCTGGAGCAGGA
123	St866-33	Saurida brasiliensis	Seawater	2012-02-22	10:42:00	0-20	27.5025	-84.4913	86	USA: Gulf of Mexico	Multiple Opening/Closing Net Environmental Sensing Sytem (MOCNESS)	Fish eggs identified to mitochondrial barcoding gene (COI).	1	CAGGGGCCCTTCTTGGAGATGACCAAATTTATAACGTTATTGTTACTGCCCACGCGTTCGTTATAATTTTCTTTATAGTAATACCAATTATAATTGGGGGCTTCGGAAACTGACTCATCCCCCTTATAATTGGCGCCCCAGACATGGCATTTCCCCGCATGAATAACATAAGCTTCTGACTCCTGCCTCCTTCCTTCCTCCTCCTCCTCGCATCCTCAGGTGTAGAGGCTGGAGCCGGGACCGGATGGACCGTTTATCCGCCCCTAGCGGGAAATCTAGCCCATGCCGGGGCATCGGTTGACCTAACCATTTTTTCTCTTCATCTGGCGGGAATTTCCTCAATTCTTGGGGCTATCAACTTTATTACCACAATTATTAACATAAAACCCCCTGCCATCT…
124	St866-34	Scomber colias	Seawater	2012-02-22	10:42:00	0-20	27.5025	-84.4913	86	USA: Gulf of Mexico	Multiple Opening/Closing Net Environmental Sensing Sytem (MOCNESS)	Fish eggs identified to mitochondrial barcoding gene (COI).	1	TTGCTTATCCGAGCAAAACTAAGTCAACCAGGGTCCCTTCTCGGCGACGACCAAATCTACAACGTAATTGTTACGGCTCACGCCTTCGTTATAATCTTCTTTTTAGTAATGCCAGTTATGATTGGAGGGTTCGGAAACTGACTGATCCCCCTAATGATCGGAGCCCCCGACATGGCATTTCCCCGAATAAATAACATAAGCTTCTGACTTCTGCCCCCATCTCTCCTGCTGCTCCTGTCTTCTTCGGCAGTTGAAGCCGGTGCTGGAACTGGCTGAACAGTTTATCCTCCCCTCGCTGGGAACCTGGCACACGCCGGGGCATCAGTTGATTTAACCATCTTCTCACTCCACCTAGCAGGTGTTTCCTCAATCCTTGGGGCCATTAACTTCATCACAACA…
125	St866-36	Prionotus alatus	Seawater	2012-02-22	10:42:00	0-20	27.5025	-84.4913	86	USA: Gulf of Mexico	Multiple Opening/Closing Net Environmental Sensing Sytem (MOCNESS)	Fish eggs identified to mitochondrial barcoding gene (COI).	1	TTCTTTTAAACTCAGCCAGCCCGGCCCCCTTTTGGGCGATGACCAACTTTATAATGTTATCGTAACAGCACATGCTTTTGTAATAATCTTTTTTATGGTGATACCCATCATGATTGGGGGATTTGGAAACTGACTTATTCCCTTAATGATTGGGGCCCCTGACATGGCTTTCCCTCGGATGAATAATATGAGCTTCTGATTACTCCCGCCTTCTTTCCTTCTTCTGCTCACCTCCTCTGCTGTAGAAGCCGGGGCGGGCACAGGATGAACCGTTTATCCCCCCCTTGCCGGAAATCTCGCCCACGCAGGAGCCTCTGTAGATTTGGCAATTTTTTCGCTTCATCTCGCAGGGATCTCCTCAATCCTAGGGGCCATTAATTTTATTACAACTATTTTTAA…
126	St866_Contig_1	Scomber colias	Seawater	2012-02-22	10:42:00	0-20	27.5025	-84.4913	86	USA: Gulf of Mexico	Multiple Opening/Closing Net Environmental Sensing Sytem (MOCNESS)	Fish eggs identified to mitochondrial barcoding gene (COI).	18	TTAGGCTTGCTTAKCGGAGCAAAACTAAGTCAACCAGGGTCCCTTCTCGGCGACGACCAAATCTACAACGTAATTGTTACGGCTCACGCCTTCGTTATAATCTTCTTTTTAGTAATGCCAGTTATGATTGGAGGGTTCGGAAACTGACTGATCCCCCTAATGATCGGAGCCCCCGACATGGCATTTCCCCGAATAAATAACATAAGCTTCTGACTTCTGCCCCCATCTCTCCTGCTGCTCCTGTCTTCTTCGGCAGTTGAAGCCGGTGCTGGAACTGGCTGAACAGTTTATCCTCCCCTCGCTGGGAACCTGGCACACGCCGGGGCATCAGTTGATTTAACCATCTTCTCACTCCACCTAGCAGGTGTTTCCTCAATCCTTGGGGCCATTAACTTCATC…
127	St866_Contig_2	Decapterus macarellus	Seawater	2012-02-22	10:42:00	0-20	27.5025	-84.4913	86	USA: Gulf of Mexico	Multiple Opening/Closing Net Environmental Sensing Sytem (MOCNESS)	Fish eggs identified to mitochondrial barcoding gene (COI).	10	CAAAACTAAGCCAACCTGGCGCCCTTCTAGGGGATGACCAAATTTACAACGTAATTGTTACGGCCCACGCTTTCGTAATAATTTTCTTTATAGTAATGCCAATTATGATTGGAGGCTTTGGAAACTGACTGATTCCGCTAATGATCGGGGCCCCTGATATAGCCTTCCCTCGAATGAATAACATGAGCTTCTGACTACTCCCTCCCTCCTTCCTCTTGCTTTTAGCCTCTTCAGGGGTTGAAGCCGGGGCCGGAACTGGTTGAACAGTCTATCCCCCACTGGCTGGGAACCTTGCCCACGCCGGAGCGTCCGTAGACTTAACCATCTTCTCCCTTCACCTAGCAGGGGTCTCGTCAATTCTAGGGGCTATTAATTTTATTACCACTATTATTAACATGA…
128	St866_Contig_4	Prionotus alatus	Seawater	2012-02-22	10:42:00	0-20	27.5025	-84.4913	86	USA: Gulf of Mexico	Multiple Opening/Closing Net Environmental Sensing Sytem (MOCNESS)	Fish eggs identified to mitochondrial barcoding gene (COI).	3	TTTTAAAATGCAGCCGGCCCGGCCCCCTTTTGGGCGACGACCAACTTTATAATGTTATCGTAACAGCACATGCTTTTGTAATAATCTTTTTTATGGTAATACCCATCATGATTGGGGGATTTGGAAACTGACTTATTCCCTTAATGATTGGGGCCCCTGACATGGCTTTCCCTCGGATAAATAATATGAGCTTCTGATTACTCCCGCCTTCTTTCCTTCTTCTGCTCACCTCCTCTGCTGTAGAAGCCGGGGCGGGCACAGGATGAACCGTTTATCCCCCCCTTGCCGGAAATCTCGCCCACGCAGGAGCCTCTGTAGATTTGGCAATTTTTTCGCTTCATCTCGCAGGGATCTCCTCAATCCTAGGGGCCATTAATTTTATTACAACTATTTTTAACA…
129	St866_Contig_5	Scomber colias	Seawater	2012-02-22	10:42:00	0-20	27.5025	-84.4913	86	USA: Gulf of Mexico	Multiple Opening/Closing Net Environmental Sensing Sytem (MOCNESS)	Fish eggs identified to mitochondrial barcoding gene (COI).	2	GTTGCTTGTGGGATCTAAACTAGGGGGACCGTGGTAAATTCACRGCAACAACCAAATCTACACGTAATTGTTACGGCTCACGCCTTCGTTATAATCTTCTTTTTAGTAATGCCAGTTATGATTGGAGGGTTCGGAAACTGACTGATCCCCCTAATGATCGGAGCCCCCGACATGGCATTTCCCCGAATAAATAACATAAGCTTCTGACTTCTGCCCCCATCTCTCCTGCTGCTCCTGTCTTCTTCGGCAGTTGAAGCCGGTGCTGGAACTGGCTGAACAGTTTATCCTCCCCTCGCTGGGAACCTGGCACACGCCGGGGCATCAGTTGATTTAACCATCTTCTCACTCCACCTAGCAGGTGTTTCCTCAATCCTTGGGGCCATTAACTTCATCACAACA…
130	St961-8	Serranus notospilus	Seawater	2012-02-23	00:21:00	100-130	26.01	-83.9967	96	USA: Gulf of Mexico	Multiple Opening/Closing Net Environmental Sensing Sytem (MOCNESS)	Fish eggs identified to mitochondrial barcoding gene (COI).	1	AAAGCTAAGCCAACCCGGCGCTCTCCTAGGAGACGACCAAATCTATAATGTAATCGTGACAGCCCATGCTTTCGTAATAATCTTCTTCATAGTTATGCCAATTATGATTGGAGGCTTTGGCAACTGACTAATCCCCCTTATAATTGGAGCCCCTGACATAGCATTCCCACGAATAAATAATATGAGCTTTTGGCTTCTCCCTCCCTCCTTCCTCCTCCTCCTAGCCTCTTCAGGGGTTGAAGCAGGGGCCGGAACCGGATGGACAGTGTATCCCCCTCTCGCTGGAAATCTAGCCCATGCTGGAGCTTCCGTTGATTTAACAATTTTTTCCCTACACCTAGCAGGTGTTTCCTCAATTTTAGGAGCTATTAATTTTATTACTACTATCATTAATATGAA…
131	St961-9	Serranus notospilus	Seawater	2012-02-23	00:21:00	100-130	26.01	-83.9967	96	USA: Gulf of Mexico	Multiple Opening/Closing Net Environmental Sensing Sytem (MOCNESS)	Fish eggs identified to mitochondrial barcoding gene (COI).	1	TGAGCCAACCCGGCGCTCTCCTAGGAGACGACCAAATCTATAATGTAATCGTGACAGCCCATGCTTTCGTAATAATCTTCTTCATAGTTATACCAATTATGATTGGAGGCTTTGGCAACTGACTAATCCCCCTTATAATTGGAGCCCCTGACATAGCATTCCCACGAATAAATAATATGAGCTTTTGGCTTCTCCCTCCCTCCTTCCTCCTCCTCCTAGCCTCTTCAGGGGTTGAAGCAGGGGCCGGAACCGGATGAACAGTGTATCCCCCTCTCGCTGGAAATCTAGCCCATGCTGGAGCTTCCGTTGATTTAACAATTTTTTCCCTACATCTAGCAGGGGTTTCCTCAATTTTAGGAGCTATTAATTTTATTACTACTATTATTAATATGAAACCCC…
132	St961-10	Serranus notospilus	Seawater	2012-02-23	00:21:00	100-130	26.01	-83.9967	96	USA: Gulf of Mexico	Multiple Opening/Closing Net Environmental Sensing Sytem (MOCNESS)	Fish eggs identified to mitochondrial barcoding gene (COI).	1	CTAAGCCAACCCGGCGCTCTCCTAGGAAACAACCAAATCTATAATGTAATCGTGACAGCCCATGCTTTCGTAATAATCTTCTTCATAGTTATGCCAATTATGATTGGAGGCTTTGGCAACTGACTAATTCCCCTTATAATTGGAGCCCCTGACATAGCATTCCCACGAATAAATAATATGAGCTTTTGGCTTCTCCCTCCCTCCTTCCTCCTCCTCCTAGCCTCTTCAGGGGTTGAAGCAGGGGCCGGAACCGGATGAACAGTGTATCCCCCTCTCGCTGGAAATCTAGCCCATGCTGGAGCTTCCGTTGATTTAACAATTTTTTCCCTACATCTAGCAGGGGTTTCCTCAATTTTAGGAGCTATTAATTTTATTACTACTATTATTAATATGAAACCC…
133	St961-16	Baldwinella vivanus	Seawater	2012-02-23	00:21:00	100-130	26.01	-83.9967	96	USA: Gulf of Mexico	Multiple Opening/Closing Net Environmental Sensing Sytem (MOCNESS)	Fish eggs identified to mitochondrial barcoding gene (COI).	1	TCTATAACGTAATTGTTACGGCCCACGCTTTCGTGATGATTTTTTTTATAGTAATACCAATCATGATTGGCGGCTTCGGTAACTGACTCATTCCTATGATAATTGGCGCCCCAGACATAGCCTTCCCTCGTATGAACAACATAAGCTTCTGACTTCTTCCCCCGTCATTTCTTCTGCTCCTTGCCTCCTCTGGGGTAGAGGCTGGGGCAGGGACGGGATGAACAGTCTATCCCCCCCTGGCCGGCAATCTAGCTCACGCAGGGGCATCCGTCGACCTCACTATCTTCTCACTACACCTAGCAGGCATTTCTTCTATTCTAGGAGCCATTAATTTCATTACAACTATCATTAATATGAAGCCCCCTGCTATTACGCAATACCAAACACCACTATTCGTAT…
134	St961-19	Bellator brachychir	Seawater	2012-02-23	00:21:00	100-130	26.01	-83.9967	96	USA: Gulf of Mexico	Multiple Opening/Closing Net Environmental Sensing Sytem (MOCNESS)	Fish eggs identified to mitochondrial barcoding gene (COI).	1	CCCCCTCCTGGGCGATGATCAACTTTATAATGTAATCGTTACAGCACACGCCTTTGTAATAATTTTCTTTATAGTAATGCCAATTATAATTGGGGGCTTTGGAAACTGACTTATTCCCCTGATAATTGGAGCTCCCGATATGGCCTTCCCCCGAATAAATAACATAAGCTTTTGACTCTTGCCCCCCTCCTTCCTACTACTCCTCACATCTTCCGCCGTCGAGGCAGGCGCTGGGACAGGGTGGACTGTTTACCCTCCCCTTGCGGGGAACCTCGCCCACGCAGGAGCCTCTGTCGACTTAGCAATTTTCTCTTTACATTTGGCGGGGATTTCCTCAATTCTGGGGGCCATTAACTTCATCACAACCATCTTTAATATGAAACCTCCCGCTATGTCAAT…
135	St961-20	Trachurus lathami	Seawater	2012-02-23	00:21:00	100-130	26.01	-83.9967	96	USA: Gulf of Mexico	Multiple Opening/Closing Net Environmental Sensing Sytem (MOCNESS)	Fish eggs identified to mitochondrial barcoding gene (COI).	1	CTGGCGCCCTTCTAGGGGATGACCAAATTTACAACGTAATTGTTACGGCCCACGCTTTCGTAATAATTTTCTTTATAGTAATGCCAATTATGATTGGAGGCTTTGGAAACTGACTGATTCCGCTAATGATCGGGGCCCCTGATATAGCCTTCCCTCGAATGAATAACATGAGCTTCTGACTACTCCCTCCCTCCTTCCTCTTGCTTTTAGCCTCTTCAGGGGTTGAAGCCGGGGCCGGAACTGGTTGAACAGTCTACCCCCCACTGGCTGGGAACCTTGCCCACGCCGGAGCGTCCGTAGACTTAACCATCTTCTCCCTTCACCTAGCAGGGGTCTCGTCAATTCTAGGGGCTATTAATTTTATTACCACTATTATTAACATGAAACCTCCTGCAGTCT…
136	St961-24	Citharichthys cornutus	Seawater	2012-02-23	00:21:00	100-130	26.01	-83.9967	96	USA: Gulf of Mexico	Multiple Opening/Closing Net Environmental Sensing Sytem (MOCNESS)	Fish eggs identified to mitochondrial barcoding gene (COI).	1	CTTAGTCAACCAGGATCCCTACTCGGGGATGACCAAATCTATCATGTTATTGTTACGGCTCATGCTTTTGTAATAATTTTCTTTATAGTAATGCCTATTATGATTGGGGGCTTTGGAAACTGATTAATCCCCCTAATAATTGGGGCCCCCGATATAGCATTTCCACGAATAAATAATATGAGTTTCTGACTTCTACCTCCCTCTTTCCTTTTACTTTTAGCCTCTTCTGGTGTAGAAGCAGGAGCAGGTACAGGTTGAACAGTATACCCGCCGCTGGCCGGAAATCTAGCCCATGCTGGAGCATCCGTAGATCTTACTATTTTTTCCCTTCATCTTGCAGGTATTTCATCTATTCTTGGGGCTATTAACTTTATTACGACTATTATTAACATAAAACCT…
137	St961-37	Serranus notospilus	Seawater	2012-02-23	00:21:00	100-130	26.01	-83.9967	96	USA: Gulf of Mexico	Multiple Opening/Closing Net Environmental Sensing Sytem (MOCNESS)	Fish eggs identified to mitochondrial barcoding gene (COI).	1	TTGATGAGGTAATCGTGACAGCCGATGCTTTCGTAATAATCTTCTTCATAGTTATGCCAATTATGATTGGAGGCTTTGGCAACTGACTAATCCCCCTTATAATTGGAGCCCCTGACATAGCATTCCCACGAATAAATAATATGAGCTTTTGGCTTCTCCCTCCCTCCTTCCTCCTCCTCCTAGCCTCTTCAGGGGTTGAAGCAGGGGCCGGAACCGGATGAACAGTGTATCCCCCTCTCGCTGGAAATCTAGCCCATGCTGGAGCTTCCGTTGATTTAACAATTTTTTCCCTACACCTAGCAGGTGTTTCCTCAATTTTAGGAGCTATTAATTTTATTACTACTATTATTAATATGAAACCCCCTGCCATCTCTCAATACCAAACTCCCTTATTTG
138	St961_Contig_1	Serranus notospilus	Seawater	2012-02-23	00:21:00	100-130	26.01	-83.9967	96	USA: Gulf of Mexico	Multiple Opening/Closing Net Environmental Sensing Sytem (MOCNESS)	Fish eggs identified to mitochondrial barcoding gene (COI).	18	CTGAGCCAACCCGGCGCTCTCCAAGGARACRACCAAATCTATAATGTAATCGTGACAGCCCATGCTTTCGTAATAATCTTCTTCATAGTTATGCCAATTATGATTGGAGGCTTTGGCAACTGACTAATCCCCCTTATAATTGGAGCCCCTGACATAGCATTCCCACGAATAAATAATATGAGCTTTTGGCTTCTCCCTCCCTCCTTCCTCCTCCTCCTAGCCTCTTCAGGGGTTGAAGCAGGGGCCGGAACCGGATGAACAGTGTATCCCCCTCTCGCTGGAAATCTAGCCCATGCTGGAGCTTCCGTTGATTTAACAATTTTTTCCCTACACCTAGCAGGTGTTTCCTCAATTTTAGGAGCTATTAATTTTATTACTACTATTATTAATATGAAACCC…
139	St961_Contig_2	Caulolatilus cyanops	Seawater	2012-02-23	00:21:00	100-130	26.01	-83.9967	96	USA: Gulf of Mexico	Multiple Opening/Closing Net Environmental Sensing Sytem (MOCNESS)	Fish eggs identified to mitochondrial barcoding gene (COI).	9	TCGGTGACGATCAAATTTACAATGTTATTGTTACTGCGCATGCCTTTGTAATAATCTTCTTCATAGTTATACCAATCATGATCGGAGGCTTCGGAAACTGACTAATCCCCCTAATAATCGGAGCCCCAGACATGGCATTCCCTCGAATAAACAACATAAGCTTCTGGCTCTTACCCCCCTCATTTTTACTGCTTCTGGCTTCCTCTGGAGTAGAAGCAGGAGCCGGGACAGGATGGACTGTTTACCCTCCCTTAGCGGGCAACCTAGCGCATGCTGGAGCATCTGTCGACCTAACCATCTTCTCCCTTCACCTGGCAGGGATTTCCTCAATTTTAGGAGCCATCAACTTCATCACAACCATTGTTAACATAAAACCACCAGCAACATCCCAGTATCAAA…
140	St962-7	Mycteroperca phenax	Seawater	2012-02-23	00:28:00	79-99	26.01	-83.9967	96	USA: Gulf of Mexico	Multiple Opening/Closing Net Environmental Sensing Sytem (MOCNESS)	Fish eggs identified to mitochondrial barcoding gene (COI).	1	GGCCCTACTAGGCAACGATCAAATCTACAACGTAATTGTTACAGCACACGCCTTTGTAATAATTTTCTTTATAGTAATACCAATTATGATTGGTGGCTTTGGAAACTGACTCATCCCACTTATAATTGGTGCCCCCGATATAGCATTCCCTCGAATGAATAATATAAGCTTCTGACTTCTCCCCCCGTCTTTCCTTCTCCTTCTCGCCTCTTCTGGTGTAGAAGCCGGAGCTGGTACCGGTTGAACGGTATACCCTCCCTTAGCTGGAAACTTAGCCCATGCAGGGGCATCTGTAGACTTAACCATTTTCTCCCTACACTTAGCAGGGATCTCATCAATTCTGGGAGCAATTAACTTTATCACAACCATTGTTAATATGAAACCCCCAGCTATCTCTCA…
141	St962-10	Hemanthias leptus	Seawater	2012-02-23	00:28:00	79-99	26.01	-83.9967	96	USA: Gulf of Mexico	Multiple Opening/Closing Net Environmental Sensing Sytem (MOCNESS)	Fish eggs identified to mitochondrial barcoding gene (COI).	1	CAAAATTAAGCCAACCTGGGGCCCTTTTAGGGGATGACCAAATTTACAACGTAATTGTCACAGCACATGCTTTCGTGATAATCTTCTTCATGGTAATGCCAATTATAATCGGCGGGTTCGGCAACTGACTTATCCCCCTAATAGTAGGCGCCCCCGACATAGCATTCCCACGAATAAATAACATGAGCTTTTGATTACTTCCCCCCTCATTTCTTCTGCTTCTGGCTTCCTCAGGCGTAGAAGCTGGGGCAGGTACCGGATGAACAGTTTACCCCCCTTTAGCCGGTAACCTAGCCCACGCAGGCGCATCAGTTGACCTTACAATTTTCTCCCTTCACCTAGCCGGAATTTCCTCTATCTTAGGGGCTATTAACTTCATTACAACCATTATTAATATGA…
142	St962-15	Saurida brasiliensis	Seawater	2012-02-23	00:28:00	79-99	26.01	-83.9967	96	USA: Gulf of Mexico	Multiple Opening/Closing Net Environmental Sensing Sytem (MOCNESS)	Fish eggs identified to mitochondrial barcoding gene (COI).	1	GCCCTAAGTTTACTTATCCGAGCCGAATTAAGCCAACCCGGTGCCCTATTAGGGGACGATCAAATCTACAACGTAATTGTTACCGC
143	St962-16	Hoplunnis diomediana	Seawater	2012-02-23	00:28:00	79-99	26.01	-83.9967	96	USA: Gulf of Mexico	Multiple Opening/Closing Net Environmental Sensing Sytem (MOCNESS)	Fish eggs identified to mitochondrial barcoding gene (COI).	1	GCCTATTAATCCGAGCCGAACTTAGCCACCAGGGGCCCTACTTGGAGATGACCAAATTTATAATGTTATCGTCACAGCACATGCCTTCGTAATAATCTTCTTTATAGTAATACCAGTTATAATCGGAGGATTCGGCAACTGATTGATCCCCCTAATAATCGGGGCCCCAGATATAGCATTCCCCCGAATGAACAACATAAGCTTCTGGCTCCTACCACCATCATTTCTGCTACTTTTGGCCTCTTCAGGGGTTGAAGCTGGAGCAGGAACAGGCTGAACTGTCTATCCCCCTCTAGCAGGAAACCTGGCCCACGCTGGAGCATCAGTCGATTTAACAATCTTCTCCCTGCATTTAGCAGGAGTCTCCTCAATTCTAGGAGCCATTAACTTCATTACCAC…
144	St962-18	Baldwinella aureorubens	Seawater	2012-02-23	00:28:00	79-99	26.01	-83.9967	96	USA: Gulf of Mexico	Multiple Opening/Closing Net Environmental Sensing Sytem (MOCNESS)	Fish eggs identified to mitochondrial barcoding gene (COI).	1	TCCTTTTAAAAAAACAAGTCTATAACGTAATTGTTACGGCCCACGCTTTCGTGATGATTTTTTTTATAGTAATACCAATCATGATTGGCGGCTTCGGTAACTGACTCATTCCTATGATAATTGGCGCCCCAGACATAGCCTTCCCTCGTATGAACAACATAAGCTTCTGACTTCTTCCCCCGTCATTTCTTCTGCTCCTTGCCTCCTCTGGGGTAGAGGCTGGGGCAGGGACGGGATGAACAGTCTATCCCCCCCTGGCCGGCAATCTAGCTCACGCAGGGGCATCCGTCGACCTCACTATCTTCTCACTACACCTAGCAGGCATTTCTTCTATTCTAGGAGCCATTAATTTCATTACAACTATCATTAATATGAAGCCCCCTGCTATTACGCAATACC…
145	St962-21	Citharichthys cornutus	Seawater	2012-02-23	00:28:00	79-99	26.01	-83.9967	96	USA: Gulf of Mexico	Multiple Opening/Closing Net Environmental Sensing Sytem (MOCNESS)	Fish eggs identified to mitochondrial barcoding gene (COI).	1	AAAACTTAGTCAACCAGGAGCCCTACTCGGGGATGACCAAATCTATAATGTTATTGTTACGGCTCATGCTTTTGTAATAATTTTCTTTATAGTAATGCCTATTATGATTGGGGGCTTTGGAAACTGATTAATCCCCCTAATAATTGGGGCCCCCGATATAGCATTTCCACGAATAAATAATATGAGTTTCTGACTTCTACCTCCCTCTTTCCTTTTACTTTTAGCCTCTTCTGGTGTAGAAGCAGGAGCAGGTACAGGTTGAACAGTATACCCGCCGCTGGCCGGAAATCTAGCCCATGCTGGAGCATCCGTAGATCTTACTATTTTTTCCCTTCATCTTGCAGGTATTTCATCTATTCTTGGGGCTATTAACTTTATTACGACTATTATTAACATAAA…
146	St962-22	Caulolatilus cyanops	Seawater	2012-02-23	00:28:00	79-99	26.01	-83.9967	96	USA: Gulf of Mexico	Multiple Opening/Closing Net Environmental Sensing Sytem (MOCNESS)	Fish eggs identified to mitochondrial barcoding gene (COI).	1	AGCAAAACTCAGCCAACCAGGCGCCCTGCTCGGTGACGATCAAATTTACAATGTTATTGTTACTGCGCATGCCTTTGTAATAATCTTCTTCATAGTTATACCAATCATGATCGGAGGCTTCGGAAACTGACTAATCCCCCTAATAATCGGAGCCCCAGACATGGCATTCCCTCGAATAAACAACATAAGCTTCTGGCTCTTACCCCCCTCATTTTTACTGCTTCTGGCTTCCTCTGGAGTAGAAGCAGGAGCCGGGACAGGATGGACTGTTTACCCTCCCTTAGCGGGCAACCTAGCGCATGCTGGAGCATCTGTCGACCTAACCATCTTCTCCCTTCACCTGGCAGGGATTTCCTCAATTTTAGGAGCCATCAACTTCATCACAACCATTGTTAACAT…
147	St962-27	Serranus notospilus	Seawater	2012-02-23	00:28:00	79-99	26.01	-83.9967	96	USA: Gulf of Mexico	Multiple Opening/Closing Net Environmental Sensing Sytem (MOCNESS)	Fish eggs identified to mitochondrial barcoding gene (COI).	1	GGCGCTCTCCAAGGAAACGACCAAATCTATAATGTAATCGTGACAGCCCATGCTTTCGTAATAATCTTCTTCATAGTTATGCCAATTATGATTGGAGGCTTTGGCAACTGACTAATCCCCCTTATAATTGGAGCCCCTGACATAGCATTCCCACGAATAAATAATATGAGCTTTTGGCTTCTCCCTCCCTCCTTCCTCCTCCTCCTAGCCTCTTCAGGGGTGGAAGCAGGGGCCGGAACCGGATGAACAGTGTATCCCCCTCTCGCTGGAAATCTAGCCCATGCTGGAGCTTCCGTTGATTTAACAATTTTTTCCCTACACCTAGCAGGTGTTTCCTCAATTTTAGGAGCTATTAATTTTATTACTACTATTATTAATATGAAACCCCCTGCCATCTCT…
148	St962-35	Decodon puellaris	Seawater	2012-02-23	00:28:00	79-99	26.01	-83.9967	96	USA: Gulf of Mexico	Multiple Opening/Closing Net Environmental Sensing Sytem (MOCNESS)	Fish eggs identified to mitochondrial barcoding gene (COI).	1	GTTATCGTTACGGCACATGCGTTCGTTATGATCTTCTTTATAGTAATACCAATTATGATCGGCGGTTTTGGCAACTGACTAATTCCTCTAATAATTGGGGCCCCCGACATGGCCTTTCCTCGAATAAACAACATAAGCTTCTGACTTCTCCCTCCCTCCTTTCTCCTCCTCCTGGCCTCTTCCGGTGTCGAAGCCGGGGCAGGCACTGGCTGAACAGTCTACCCCCCACTAGCAGGCAATCTCGCCCACGCAGGGGCCTCCGTTGACTTAACCATTTTCTCACTCCACCTAGCCGGAATCTCTTCCATTCTAGGTGCCATCAACTTTATTACAACCATTATTAACATGAAACCACCCGCTATCACTCAGTACCAAACCCCCCTCTTTGTGTGGGCGGTC…
149	St962-41	Caulolatilus microps	Seawater	2012-02-23	00:28:00	79-99	26.01	-83.9967	96	USA: Gulf of Mexico	Multiple Opening/Closing Net Environmental Sensing Sytem (MOCNESS)	Fish eggs identified to mitochondrial barcoding gene (COI).	1	ACAGGATGAACCGTATACCCCCCTTTAGCGGGAAACCTAGCACATGCTGGAGCCTCCGTCGATTTAACCATCTTCTCCCTTCACTTAGCAGGAATTTCCTCAATTTTAGGGGCCATCAACTTTATTACAACCATCATTAATATAAAACCACCAGCATCGTCCCAATATCAGACCCCATTATTTGTGTGATCTGTACTAATT
150	St962-46	Baldwinella aureorubens	Seawater	2012-02-23	00:28:00	79-99	26.01	-83.9967	96	USA: Gulf of Mexico	Multiple Opening/Closing Net Environmental Sensing Sytem (MOCNESS)	Fish eggs identified to mitochondrial barcoding gene (COI).	1	AAAAAAGGTCTATGACGTAATTGTTACGGCCCACGCTTTCGTGATGATTTTTTTTATAGTAATACCAATCATGATTGGGGGCTTCGGTAACTGACTCATTCCTATGATAATTGGCGCCCCAGACATAGCCTTCCCTCGTATGAACAACATAATCTTCTGACTTCTTCCCCCGTCATTTCTTCTGCTCCTTGCCTCCTCTGGGGTAGAGGCTGGGGCAGGGACGGGATGAACAGTCTATCCCCCCCTGGCCGGCAATCTAGCTCACGCAGGGGCATCCGTCTACCTCACTATCTTCTCACTACGCCTAGCAGGCATTTCTTCTATTCGAGGAGCCATTAATTTCATTACTTCTATAATTAATATGAAGCCCCCTG
151	St962_Contig_2	Serranus notospilus	Seawater	2012-02-23	00:28:00	79-99	26.01	-83.9967	96	USA: Gulf of Mexico	Multiple Opening/Closing Net Environmental Sensing Sytem (MOCNESS)	Fish eggs identified to mitochondrial barcoding gene (COI).	8	AAAGCTAAGCCAACCCGGCGCTCTCCTAGGAGACGACCAAATCTATAATGTAATCGTGACAGCCCATGCTTTCGTAATAATCTTCTTCATAGTTATGCCAATTATGATTGGAGGCTTTGGCAACTGACTAATCCCCCTTATAATTGGAGCCCCTGACATAGCATTCCCACGAATAAATAATATGAGCTTTTGGCTTCTCCCTCCCTCCTTCCTCCTCCTCCTAGCCTCTTCAGGGGTTGAAGCAGGGGCCGGAACCGGATGAACAGTGTATCCCCCTCTCGCTGGAAATCTAGCCCATGCTGGAGCTTCCGTTGATTTAACAATTTTTTCCCTACACCTAGCAGGTGTTTCCTCAATTTTAGGAGCTATTAATTTTATTACTACTATTATTAATATGAA…
152	St962_Contig_3	Baldwinella aureorubens	Seawater	2012-02-23	00:28:00	79-99	26.01	-83.9967	96	USA: Gulf of Mexico	Multiple Opening/Closing Net Environmental Sensing Sytem (MOCNESS)	Fish eggs identified to mitochondrial barcoding gene (COI).	5	GGCCCTCAAAGGGAAAGACCAGGTCTATAACGTAATTGTTACGGCCCACGCTTTCGTGATGATTTTTTTTATAGTAATACCAATCATGATTGGCGGCTTCGGTAACTGACTCATTCCTATGATAATTGGCGCCCCAGACATAGCCTTCCCTCGTATGAACAACATAAGCTTCTGACTTCTTCCCCCGTCATTTCTTCTGCTCCTTGCCTCCTCTGGGGTAGAGGCTGGGGCAGGGACGGGATGAACAGTCTATCCCCCCCTGGCCGGCAATCTAGCTCACGCAGGGGCATCCGTCGACCTCACTATCTTCTCACTACACCTAGCAGGCATTTCTTCTATTCTAGGAGCCATTAATTTCATTACAACTATCATTAATATGAAGCCCCCTGCTATTACGCA…
153	St962_Contig_4	Pagrus pagrus	Seawater	2012-02-23	00:28:00	79-99	26.01	-83.9967	96	USA: Gulf of Mexico	Multiple Opening/Closing Net Environmental Sensing Sytem (MOCNESS)	Fish eggs identified to mitochondrial barcoding gene (COI).	2	TGATTCGAGCTAAGCTTAGCCAGCCCGGGGCTCTCCTAGGCGACAACCAGATTTATAATGTTATTGTTACAGCACACGCGTTTGTAATAATTTTCTTTATAGTTATACCAATTATGATTGGAGGCTTTGGGAACTGATTAATTCCACTTATGATTGGTGCCCCTGACATAGCATTCCCCCGAATGAACAACATGAGTTTCTGACTGCTCCCTCCCTCATTCCTTCTCCTACTTGCCTCCTCAGGAGTTGAAGCCGGAGCTGGCACCGGATGAACGGTTTATCCGCCACTAGCTGGGAATCTTGCCCACGCAGGAGCATCAGTAGACCTAACCATCTTTTCTCTCCACYTAGCTGGAATTTCATCAATTCTTGGTGCAATCAATTTTATTACTACCATTA…
154	St963-10	Bellator brachychir	Seawater	2012-02-23	00:36:00	60-78	26.01	-83.9967	96	USA: Gulf of Mexico	Multiple Opening/Closing Net Environmental Sensing Sytem (MOCNESS)	Fish eggs identified to mitochondrial barcoding gene (COI).	1	CCAGCCCCCTCCCGGGCGATGATCAACTTTATAATGTAATCGTTACAGCACACGCCTTTGTAATAATTTTCTTTATAGTAATGCCAATTATAATTGGGGGATTTGGAAACTGACTTATTCCCCTGATAATTGGAGCTCCCGATATGGCCTTCCCCCGAATAAATAACATAAGCTTTTGACTCTTGCCCCCCTCCTTCCTGCTACTCCTCACGTCTTCAGCCGTCGAGGCAGGCGCTGGGACAGGGTGGACTGTTTATCCTCCCCTTGCGGGGAACCTCGCCCACGCAGGAGCCTCTGTCGACTTAGCAATTTTCTCCTTACATTTGGCGGGGATTTCCTCAATTCTAGGGGCCATTAACTTCATCACAACCATCTTTAATATGAAACCTCCCGCTATGT…
155	St963-20	Bellator egretta	Seawater	2012-02-23	00:36:00	60-78	26.01	-83.9967	96	USA: Gulf of Mexico	Multiple Opening/Closing Net Environmental Sensing Sytem (MOCNESS)	Fish eggs identified to mitochondrial barcoding gene (COI).	1	TCGGGCAGAACTAAGTCAACCGGGGCCTCTCCTGGGCGACGACCAGCTTTACAATGTTATCGTCACCGCACACGCCTTTGTAATAATTTTCTTTATGGTAATGCCAATCATAATTGGGGGGTTTGGAAACTGACTGATCCCCTTAATAATTGGGGCCCCTGACATAGCTTTCCCCCGAATAAATAACATAAGCTTCTGACTTCTCCCCCCTTCCTTCCTCCTGCTCCTAACATCTTCAGCCGTAGAAGCTGGGGCTGGGACAGGTTGAACTGTTTACCCCCCTCTCGCCGGCAACCTCGCCCATGCAGGGGCCTCCGTAGA
156	St963-21	Saurida brasiliensis	Seawater	2012-02-23	00:36:00	60-78	26.01	-83.9967	96	USA: Gulf of Mexico	Multiple Opening/Closing Net Environmental Sensing Sytem (MOCNESS)	Fish eggs identified to mitochondrial barcoding gene (COI).	1	GCCCTAAGTTTACTTATCCGAGCCGAATTAAGCCAACCCGGTGCCCTATTAGGGGACGATCAAATCTACAACGTAATTGTTACCGC
157	St963-22	Mycteroperca microlepis	Seawater	2012-02-23	00:36:00	60-78	26.01	-83.9967	96	USA: Gulf of Mexico	Multiple Opening/Closing Net Environmental Sensing Sytem (MOCNESS)	Fish eggs identified to mitochondrial barcoding gene (COI).	1	GCTTGTCTGAGCTGAGCTAAGCCAGCCAGGAGCCCTACTAGGCGACGATCAAATCTATAACGTAATTGTTACAGCACACGCCTTCGTAATAATTTTCTTTATAGTAATACCAATTATGATTGGTGGCTTTGGAAACTGACTCATCCCACTTATAATCGGTGCCCCTGATATAGCATTCCCTCGAATGAATAACATAAGCTTCTGACTTCTTCCCCCATCTTTCCTGCTCCTTCTCGCCTCCTCTGGCGTAGAAGCCGGAGCCGGTACCGGTTGAACGGTGTATCCTCCCTTAGCTGGAAACTTAGCCCATGCAGGGGCATCTGTAGACTTAACCATTTTCTCCCTGCATTTAGCAGGAATTTCATCAATTCTAGGAGCAATTAACTTTATCACAACCAT…
158	St963-28	Saurida brasiliensis	Seawater	2012-02-23	00:36:00	60-78	26.01	-83.9967	96	USA: Gulf of Mexico	Multiple Opening/Closing Net Environmental Sensing Sytem (MOCNESS)	Fish eggs identified to mitochondrial barcoding gene (COI).	1	GGATAGTGGGCACTGCCCTAAGTTTACTTATCCGAGCCGAATTAAGCCAACCCGGTGCCCTATTAGGGGACGATCAAATCTACAACGTAATTGTTACCGC
159	St963-30	Serranus notospilus	Seawater	2012-02-23	00:36:00	60-78	26.01	-83.9967	96	USA: Gulf of Mexico	Multiple Opening/Closing Net Environmental Sensing Sytem (MOCNESS)	Fish eggs identified to mitochondrial barcoding gene (COI).	1	TGAGCCAACCCGGCGCTCTCCAAAGAGACAACCAAATCTATAATGTAATCGTGACAGCCCATGCTTTCGTAATAATCTTCTTCATAGTTATGCCAATTATGATTGGAGGCTTTGGCAACTGACTAATCCCCCTTATAATTGGAGCCCCTGACATAGCATTCCCACGAATAAATAATATGAGCTTTTGGCTTCTCCCTCCCTCCTTCCTCCTCCTCCTAGCCTCTTCAGGGGTTGAAGCAGGAGCCGGAACCGGATGAACAGTGTATCCCCCTCTCGCTGGAAATCTGGCCCATGCTGGAGCTTCCGTTGATTTAACAATTTTTTCCCTACACCTAGCAGGTGTTTCCTCAATTTTAGGAGCTATTAATTTTATTACTACTATCATTAATATGAAACCCC…
160	St963_Contig_1	Synodus poeyi	Seawater	2012-02-23	00:36:00	60-78	26.01	-83.9967	96	USA: Gulf of Mexico	Multiple Opening/Closing Net Environmental Sensing Sytem (MOCNESS)	Fish eggs identified to mitochondrial barcoding gene (COI).	11	GGGATGACGGTAGGGGCTTAAGCCTTTTGATCGGGGCCGAACTCAGCCAGCCGGGGGCCCTTTTAGGGGACGACCAGATCTATAACGTTATCGTTACAGCCCATGCTTTTGTTATAATCTTTTTTATAGTGATACCAATTATAATCGGGGGATTCGGAAACTGGTTAATCCCCTTAATGATCGGCGCCCCAGATATGGCCTTCCCTCGAATAAACAATATAAGCTTTTGGCTTCTCCCCCCCTCTTTCCTACTCCTCTTGGCCTCTTCGGGTGTCGAAGCCGGGGCAGGAACGGGGTGGACCGTTTACCCCCCCTTAGCAGGAAATTTGGCCCACGCTGGGGCTTCAGTGGATCTAACAATTTTTTCTCTGCACTTGGCAGGAATCTCATCTATTTTAG…
161	St963_Contig_3	Caulolatilus cyanops	Seawater	2012-02-23	00:36:00	60-78	26.01	-83.9967	96	USA: Gulf of Mexico	Multiple Opening/Closing Net Environmental Sensing Sytem (MOCNESS)	Fish eggs identified to mitochondrial barcoding gene (COI).	5	CCTACTCATCCKAGCARAACTCAGCCAACCAGGCGCCCTGCTCGGTGACGATCAAATTTACAATGTTATTGTTACTGCGCATGCCTTTGTAATAATCTTCTTCATAGTTATACCAATCATGATCGGAGGCTTCGGAAACTGACTAATCCCCCTAATAATCGGAGCCCCAGACATGGCATTCCCTCGAATAAACAACATAAGCTTCTGGCTCTTACCCCCCTCATTTTTACTGCTTCTGGCTTCCTCTGGAGTAGAAGCAGGAGCCGGGACAGGATGGACTGTTTACCCTCCCTTAGCGGGCAACCTAGCGCATGCTGGAGCATCTGTCGACCTAACCATCTTCTCCCTTCACCTGGCAGGGATTTCCTCAATTTTAGGAGCCATCAACTTCATCACAAC…
162	St963_Contig_4	Pagrus pagrus	Seawater	2012-02-23	00:36:00	60-78	26.01	-83.9967	96	USA: Gulf of Mexico	Multiple Opening/Closing Net Environmental Sensing Sytem (MOCNESS)	Fish eggs identified to mitochondrial barcoding gene (COI).	3	CCGGGGCTCTCCTAGGCGACGACCAGATTTATAATGTTATTGTTACAGCACACGCGTTTGTAATAATTTTCTTTATAGTTATACCAATTATGATTGGAGGCTTTGGGAACTGATTAATTCCACTTATGATTGGTGCCCCTGACATAGCATTCCCCCGAATGAACAACATGAGTTTCTGACTGCTCCCTCCCTCATTCCTTCTCCTACTTGCCTCCTCAGGAGTTGAAGCCGGAGCTGGCACCGGATGAACGGTTTATCCGCCACTAGCTGGGAATCTTGCCCACGCAGGAGCATCAGTAGACCTAACCATCTTTTCTCTCCACTTAGCTGGGATTTCATCAATTCTTGGTGCAATCAATTTTATTACTACCATTATCAACATGAAACCCCCTGCTATTT…
163	St963_Contig_5	Saurida normani	Seawater	2012-02-23	00:36:00	60-78	26.01	-83.9967	96	USA: Gulf of Mexico	Multiple Opening/Closing Net Environmental Sensing Sytem (MOCNESS)	Fish eggs identified to mitochondrial barcoding gene (COI).	2	GTGCATGAGCCGGCATAGTAGGCACGGCCCTAAGCCTCCTAATTCGTGCTGAACTCAGCCAGCCAGGGGCCCTTCTTGGAGATGACCAAATTTATAACGTTATTGTTACTGCCCACGCGTTCGTTATAATTTTCTTTATAGTAATACCAATTATAATTGGGGGCTTCGGAAACTGACTCATCCCCCTTATAATTGGCGCCCCAGACATGGCATTTCCCCGCATGAATAACATAAGCTTCTGACTCCTGCCTCCTTCCTTCCTCCTCCTCCTCGCATCCTCAGGTGTAGAGGCTGGAGCCGGGACCGGATGGACCGTTTATCCGCCCCTAGCGGGAAATCTAGCCCATGCCGGGGCATCGGTTGACCTAACCATTTTTTCTCTTCATCTGGCGGGAATTT…
164	St963_Contig_6	Synodus poeyi	Seawater	2012-02-23	00:36:00	60-78	26.01	-83.9967	96	USA: Gulf of Mexico	Multiple Opening/Closing Net Environmental Sensing Sytem (MOCNESS)	Fish eggs identified to mitochondrial barcoding gene (COI).	2	GGGCTTAAGCCTTTTAAGCCGGGCCAAACTCAGCCAGCCGGGGGCCCTTTTAGGGGACGACCAGATCTATAACGTTATCGTTACAGCCCATGCTTTTGTTATAATCTTTTTTATAGTGATACCGATTATAATCGGGGGATTCGGAAACTGGTTAATCCCCTTAATGATCGGCGCCCCAGATATGGCCTTCCCTCGAATAAACAATATAAGCTTTTGGCTTCTCCCCCCCTCTTTCCTACTCCTCTTGGCCTCTTCGGGTGTCGAAGCCGGGGCAGGAACGGGGTGGACCGTTTACCCCCCCTTAGCAGGAAATTTGGCCCACGCTGGGGCTTCAGTGGATCTAACAATTTTTTCTCTGCACTTGGCAGGAATCTCATCTATTTTAGGGGCAATCAACTT…
165	St963_Contig_7	Caulolatilus microps	Seawater	2012-02-23	00:36:00	60-78	26.01	-83.9967	96	USA: Gulf of Mexico	Multiple Opening/Closing Net Environmental Sensing Sytem (MOCNESS)	Fish eggs identified to mitochondrial barcoding gene (COI).	2	ACAGGATGAACCGTATACCCCCCTTTAGCGGGAAACCTAGCACATGCTGGAGCCTCCGTCGATTTAACCATCTTCTCCCTTCACTTAGCAGGAATTTCCTCAATTTTAGGGGCCATCAACTTTATTACAACCATCATTAATATAAAACCACCAGCATCGTCCCAATATCAGACCCCATTATTTGTGTGATCTGTACTAATT
166	St964-1	Scomber colias	Seawater	2012-02-23	00:43:00	37-59	26.01	-83.9967	96	USA: Gulf of Mexico	Multiple Opening/Closing Net Environmental Sensing Sytem (MOCNESS)	Fish eggs identified to mitochondrial barcoding gene (COI).	1	GGAATAGTTGGCACGGCCTTAGGCTTGCTTATGCGAGCTGAACTAAGTCAACCAGGGTCCCTTCTCGGCGACGACCAAATCTACAACGTAATTGTTACGGCTCACGCCTTCGTTATAATCTTCTTTTTAGTAATGCCAGTTATGATTGGAGGGTTCGGAAACTGACTGATCCCCCTAATGATCGGAGCCCCCGACATGGCATTTCCCCGAATAAATAACATAAGCTTCTGACTTCTGCCCCCATCTCTCCTGCTGCTCCTGTCTTCTTCGGCAGTTGAAGCCGGTGCTGGAACTGGCTGAACAGTTTATCCTCCCCTCGCTGGGAACCTGGCACACGCCGGGGCATCAGTTGATTTAACCATCTTCTCACTCCACCTAGCAGGTGTTTCCTCAATCCTT…
167	St964-6	Synagrops trispinosus	Seawater	2012-02-23	00:43:00	37-59	26.01	-83.9967	96	USA: Gulf of Mexico	Multiple Opening/Closing Net Environmental Sensing Sytem (MOCNESS)	Fish eggs identified to mitochondrial barcoding gene (COI).	1	AAAAAAAAAATTTACAATGTAATCGTAACGGCGCACGCCTTTGTAATAATTTTCTTTATAGTAATACCCATCAAATTGGAGGTTTCGGAAATTGACTGATTCCCCTAATGATTGGGGCCCCTGACATGGCATTCCCTCGAATGAATAATATGAGTTTTTGACTCCTTCCCCCTTCTTTCCTTCTCCTCCTCTCTTCCTCTGCAGTTGAGGCTGGGGCCGGCACCGGATGAACATTATACCCCCCTTTAGCAAGTAACCTTGCCCACGCGGGGGCCTCTGTAGA
168	St964-8	Seriola zonata	Seawater	2012-02-23	00:43:00	37-59	26.01	-83.9967	96	USA: Gulf of Mexico	Multiple Opening/Closing Net Environmental Sensing Sytem (MOCNESS)	Fish eggs identified to mitochondrial barcoding gene (COI).	1	AAAATTGAGTCAGCCCGGTGCTCTTCTAGGAGACAATCAAATTTATAACGTAATCGTTACAGCACACGCATTTGTAATAATTTTCTTTATAGTAATACCAATTATGATTGGAGGGTTTGGGAACTGGCTTATCCCCCTAATGATCGGGGCCCCTGATATAGCATTCCCTCGAATAAATAACATGAGCTTCTGACTTCTTCCCCCCTCATTCCTCCTACTCCTAGCCTCCTCAGGCGTTGAAGCCGGGGCCGGAACGGGTTGAACAGTTTACCCTCCCCTAGCAGGTAACCTCGCCCACGCAGGAGCATCCGTAGACTTAACGATTTTCTCCCTTCATTTAGCTGGAATCTCCTCAATTCTAGGAGCAATTAACTTTATTACAACCATCGTCAACATGAA…
169	St964-19	Ariomma bondi	Seawater	2012-02-23	00:43:00	37-59	26.01	-83.9967	96	USA: Gulf of Mexico	Multiple Opening/Closing Net Environmental Sensing Sytem (MOCNESS)	Fish eggs identified to mitochondrial barcoding gene (COI).	1	CGATTGTCCTGGCGCCCTTCTGGGGGACGACCAAATCAAAAACGTAATCGTTACAGCACACGCCTTCGTAATAATTTTCTTTATAGTAATACCAATCATAATTGGAGGATTTGGAAACTGGCTCATCCCACTAATGATCGGGGCCCCAGACATAGCATTCCCTCGAATAAACAACATGAGCTTCTGACTTCTACCTCCTTCTTTCCTACTTCTCCTAGCCTCTTCTGGGGTTGAAGCCGGTGCCGGAACTGGATGGACAGTGTACCCTCCCCTAGCCGGCAATCTAGCACACGCTGGAGCATCAGTCGACCTAACTATTTTTTCTCTTCATCTCGCAGGGGTTTCCTCAATTCTTGGGGCCATTAACTTCATTACAACAATCATCAACATAAAACCCGC…
170	St964-20	Bellator egretta	Seawater	2012-02-23	00:43:00	37-59	26.01	-83.9967	96	USA: Gulf of Mexico	Multiple Opening/Closing Net Environmental Sensing Sytem (MOCNESS)	Fish eggs identified to mitochondrial barcoding gene (COI).	1	ACTAAGTCAACCGGGGCCTCTCCTGGGCGACGACCAGCTTTACAATGTTATCGTCACCGCACACGCCTTTGTAATAATTTTCTTTATGGTAATGCCAATCATAATTGGGGGGTTTGGAAACTGACTGATCCCCTTAATAATTGGGGCCCCTGACATAGCTTTCCCCCGAATAAATAACATAAGCTTCTGACTTCTCCCCCCTTCCTTCCTCCTGCTCCTAACATCTTCAGCCGTAGAAGCTGGGGCTGGGACAGGTTGAACTGTTTACCCCCCTCTCGCCGGCAACCTCGCCCATGCAGGGGCCTCCGTAGA
171	St964-43	Serranus notospilus	Seawater	2012-02-23	00:43:00	37-59	26.01	-83.9967	96	USA: Gulf of Mexico	Multiple Opening/Closing Net Environmental Sensing Sytem (MOCNESS)	Fish eggs identified to mitochondrial barcoding gene (COI).	1	TGAGCCAACCCGGCGCTCTCCTAGGAGACGACCAAATCTATAATGTAATCGTGACAGCCCATGCTTTCGTAATAATCTTCTTCATAGTTATGCCAATTATGATTGGGGGCTTTGGCAACTGACTAATCCCCCTTATAATTGGAGCCCCTGACATAGCATTCCCACGAATAAATAATATGAGCTTTTGGCTTCTCCCTCCCTCCTTCCTCCTCCTCCTAGCCTCTTCAGGGGTTGAAGCAGGGGCCGGAACCGGATGAACAGTGTATCCCCCTCTCGCTGGAAATCTAGCCCATGCTGGAGCTTCCGTTGATTTAACAATTTTTTCCCTACACCTAGCAGGTGTTTCCTCAATTTTAGGAGCTATTAATTTTATTACTACTATTATTAATATGAAACCCC…
172	St964-47	Caulolatilus cyanops	Seawater	2012-02-23	00:43:00	37-59	26.01	-83.9967	96	USA: Gulf of Mexico	Multiple Opening/Closing Net Environmental Sensing Sytem (MOCNESS)	Fish eggs identified to mitochondrial barcoding gene (COI).	1	CAGGCGCCCTGCTCGGTGACGATCAAATTTACAATGTTATTGTTACTGCGCATGCCTTTGTAATAATCTTCTTCATAGTTATACCAATCATGATCGGAGGCTTCGGAAACTGACTAATCCCCCTAATAATTGGAGCCCCGGACATGGCATTCCCTCGAATAAACAACATAAGCTTCTGGCTCTTACCCCCCTCATTTTTACTGCTTCTGGCTTCCTCTGGAGTAGAAGCAGGAGCCGGGACAGGATGGACTGTTTACCCTCCCTTAGCGGGCAACCAAGCGCACGCTGGAGCATCTGTCGACCTAACCATCTTCTCCCTTCACCTGGCAGGGATTTCCTCAGTTTTAGGAGCCATCAACTTCATCACAACCATTGTTAACATAAAACCACCAGCAACAT…
173	St964_Contig_1	Synodus poeyi	Seawater	2012-02-23	00:43:00	37-59	26.01	-83.9967	96	USA: Gulf of Mexico	Multiple Opening/Closing Net Environmental Sensing Sytem (MOCNESS)	Fish eggs identified to mitochondrial barcoding gene (COI).	24	ACGGCCTTAAGCCTTTTAATCCGGGCCGAACTCAGCCAGCCGGGGGCCCTTTTAGGGGACGACCAGATCTATAACGTTATCGTTACAGCCCATGCTTTTGTTATAATCTTTTTTATAGTGATACCAATTATAATCGGGGGATTCGGAAACTGGTTAATCCCCTTAATGATCGGCGCCCCAGATATGGCCTTCCCTCGAATAAACAATATAAGCTTTTGGCTTCTCCCCCCCTCTTTCCTACTCCTCTTGGCCTCTTCGGGTGTCGAAGCCGGGGCAGGAACGGGGTGGACCGTTTACCCCCCCTTAGCAGGAAATTTGGCCCACGCTGGGGCTTCAGTGGATCTAACAATTTTTTCTCTGCACTTGGCAGGAATCTCATCTATTTTAGGGGCAATCAAC…
174	St964_Contig_3	Maurolicus weitzmani	Seawater	2012-02-23	00:43:00	37-59	26.01	-83.9967	96	USA: Gulf of Mexico	Multiple Opening/Closing Net Environmental Sensing Sytem (MOCNESS)	Fish eggs identified to mitochondrial barcoding gene (COI).	10	TCATTCGAGCARAACTCAGCCAGCCCGGAGCTCTCCTGGGCGACGACCAGATCTACAACGTACTGGTCACAGCTCACGCCTTCGTAATAATTTTCTTTATAGTCATGCCTATTATAATTGGAGGCTTTGGGAACTGACTAATTCCCCTAATGATCGGGGCCCCAGACATAGCCTTTCCTCGAATAAACAACATAAGCTTCTGACTCCTGCCGCCCTCCTTCCTTCTCCTTTTAGCCTCCTCCGGGGTTGAAGCAGGCGCAGGAACTGGGTGAACCGTTTACCCTCCTCTTGCTAGCAACTTGGCCCACGCAGGGGCCTCTGTCGACCTTACCATTTTCTCGCTCCATCTCGCAGGTATTTCCTCAATCCTTGGAGCAATTAATTTTATTACCACTATTA…
175	St964_Contig_4	Caulolatilus cyanops	Seawater	2012-02-23	00:43:00	37-59	26.01	-83.9967	96	USA: Gulf of Mexico	Multiple Opening/Closing Net Environmental Sensing Sytem (MOCNESS)	Fish eggs identified to mitochondrial barcoding gene (COI).	9	GATAGTATGCACGGCACTAAGCCTACTCATCCGAGCARAACTCAGCCAACCAGGCGCCCTGCTCGGTGACGATCAAATTTACAATGTTATTGTTACTGCGCATGCCTTTGTAATAATCTTCTTCATAGTTATACCAATCATGATCGGAGGCTTCGGAAACTGACTAATCCCCCTAATAATCGGAGCCCCAGACATGGCATTCCCTCGAATAAACAACATAAGCTTCTGGCTCTTACCCCCCTCATTTTTACTGCTTCTGGCTTCCTCTGGAGTAGAAGCAGGAGCCGGGACAGGATGGACTGTTTACCCTCCCTTAGCGGGCAACCTAGCGCATGCTGGAGCATCTGTCGACCTAACCATCTTCTCCCTTCACCTGGCAGGGATTTCCTCAATTTTAGG…
176	St964_Contig_5	Scomber colias	Seawater	2012-02-23	00:43:00	37-59	26.01	-83.9967	96	USA: Gulf of Mexico	Multiple Opening/Closing Net Environmental Sensing Sytem (MOCNESS)	Fish eggs identified to mitochondrial barcoding gene (COI).	7	AGCTTGCTTATGGGAGCAAAACTAAGTCAACCAGGGTCCCTTCTCGGCGACRACCAAATCTACAACGTAATTGTTACGGCTCACGCCTTCGTTATAATCTTCTTTTTAGTAATGCCAGTTATGATTGGAGGGTTCGGAAACTGACTGATCCCCCTAATGATCGGAGCCCCCGACATGGCATTTCCCCGAATAAATAACATAAGCTTCTGACTTCTGCCCCCATCTCTCCTGCTGCTCCTGTCTTCTTCGGCAGTTGAAGCCGGTGCTGGAACTGGCTGAACAGTTTATCCTCCCCTCGCTGGGAACCTGGCACACGCCGGGGCATCAGTTGATTTAACCATCTTCTCACTCCACCTAGCAGGTGTTTCCTCAATCCTTGGGGCCATTAACTTCATCACA…
177	St964_Contig_6	Saurida normani	Seawater	2012-02-23	00:43:00	37-59	26.01	-83.9967	96	USA: Gulf of Mexico	Multiple Opening/Closing Net Environmental Sensing Sytem (MOCNESS)	Fish eggs identified to mitochondrial barcoding gene (COI).	3	TTGGTGCATGAGCCGGCATAGTAGGCACGGGCCTAAGCCTCCTAATTCGTGCTGAACTCAGCCAGCCAGGGGCCCTTCTTGGAGATGACCAAATTTATAACGTTATTGTTACTGCCCACGCGTTCGTTATAATTTTCTTTATAGTAATACCAATTATAATTGGGGGCTTCGGAAACTGACTCATCCCCCTTATAATTGGCGCCCCAGACATGGCATTTCCCCGCATGAATAACATAAGCTTCTGACTCCTGCCTCCTTCCTTCCTCCTCCTCCTCGCATCCTCAGGTGTAGAGGCTGGAGCCGGGACCGGATGGACCGTTTATCCGCCCCTAGCGGGAAATCTAGCCCATGCCGGGGCATCGGTTGACCTAACCATTTTTTCTCTTCATCTGGCGGGAA…
178	St964_Contig_7	Ariomma bondi	Seawater	2012-02-23	00:43:00	37-59	26.01	-83.9967	96	USA: Gulf of Mexico	Multiple Opening/Closing Net Environmental Sensing Sytem (MOCNESS)	Fish eggs identified to mitochondrial barcoding gene (COI).	3	GCTGGAATAGTAGGCACAGCCGTAAGCCTACTCATCCTAGCTGAACTAAACCAACCAGGCGCCCTTCTTGGGGACGACCAAATCTATAACGTAATCGTTACAGCACACGCCTTCGTAATAATTTTCTTTATAGTAATACCAATCATAATTGGAGGATTTGGAAACTGGCTCATCCCACTAATGATCGGGGCCCCAGACATAGCATTCCCTCGAATAAACAACATGAGCTTCTGACTTCTACCTCCTTCTTTCCTACTTCTCCTAGCCTCTTCTGGGGTTGAAGCCGGTGCCGGAACTGGATGGACAGTGTACCCTCCCCTAGCCGGCAATCTAGCACACGCTGGAGCATCAGTCGACCTAACTATTTTTTCTCTTCATCTCGCAGGGGTTTCCTCAATT…
179	St964_Contig_9	Trachurus lathami	Seawater	2012-02-23	00:43:00	37-59	26.01	-83.9967	96	USA: Gulf of Mexico	Multiple Opening/Closing Net Environmental Sensing Sytem (MOCNESS)	Fish eggs identified to mitochondrial barcoding gene (COI).	2	TTATTGGGGCAAAACTAAGCCAACCTGGCGCCCTTCTAGGGGATGACCAAATTTACAACGTAATTGTTACGGCCCACGCTTTCGTAATAATTTTCTTTATAGTAATGCCAATTATGATTGGAGGCTTTGGAAACTGACTGATTCCGCTAATGATCGGGGCCCCTGATATAGCCTTCCCTCGAATGAATAACATGAGCTTCTGACTACTCCCTCCYTCCTTCCTCTTGCTTTTAGCCTCTTCAGGGGTTGAAGCCGGGGCCGGAACTGGTTGAACAGTCTAYCCCCCACTGGCTGGGAACCTTGCCCACGCCGGAGCGTCCGTAGACTTAACCATCTTCTCCCTTCACCTAGCAGGGGTCTCGTCAATTCTAGGGGCTATTAATTTTATTACCACTATTA…
180	St964_Contig_10	Mullus auratus	Seawater	2012-02-23	00:43:00	37-59	26.01	-83.9967	96	USA: Gulf of Mexico	Multiple Opening/Closing Net Environmental Sensing Sytem (MOCNESS)	Fish eggs identified to mitochondrial barcoding gene (COI).	2	TTTGAGCCTCCTGATTCGTGCCGAACTAAGCCAGCCTGGCGCTCTCCTGGGAGACGACCAGATTTACAACGTAATCGTTACAGCTCATGCCTTTGTAATAATTTTCTTTATGGTAATGCCAATTATGATTGGAGGGTTCGGCAACTGACTAATTCCACTAATGATCGGGGCCCCCGACATGGCTTTCCCCCGGATGAACAACATGAGCTTCTGACTTCTTCCCCCCTCATTCCTTCTCCTGCTCGCTTCTTCAGGTGTCGAAGCTGGTGCAGGT
181	St965-13	Saurida normani	Seawater	2012-02-23	00:49:00	20-36	26.01	-83.9967	96	USA: Gulf of Mexico	Multiple Opening/Closing Net Environmental Sensing Sytem (MOCNESS)	Fish eggs identified to mitochondrial barcoding gene (COI).	1	TTAAAAACGTTATTGTTACGGCCCACGCGTTCGTTATAATTTTCTTTATAGTAATACCAATTATAATTGGGGGCTTCGGAAACTGACTCATCCCCCTTATAATTGGCGCCCCAGACATGGCATTTCCCCGCATGAATAACATAAGCTTCTGACTCCTGCCTCCTTCCTTCCTCCTCCTCCTCGCATCCTCAGGTGTAGAGGCTGGAGCCGGGACCGGATGGACCGTTTATCCGCCCCTAGCGGGAAATCTAGCCCATGCCGGGGCATCGGTTGACCTAACCATTTTTTCTCTTCATCTGGCGGGAATTTCCTCAATTCTTGGGGCTATCAACTTTATTACCACAATTATTAACATAAAACCCCCTGCCATCTCACAATACCAAACCCCTCTATTCGTGT…
182	St965-23	Synodus poeyi	Seawater	2012-02-23	00:49:00	20-36	26.01	-83.9967	96	USA: Gulf of Mexico	Multiple Opening/Closing Net Environmental Sensing Sytem (MOCNESS)	Fish eggs identified to mitochondrial barcoding gene (COI).	1	TGTATGAGGTTATCGTTACAGCCGATGCTTTTGTTATAATCTTTTTTATAGTGATACCAATCATAATCGGGGGATTCGGAAACTGGTTAATCCCCTTAATGGTCGGCGCCCCAGATATGGCCTTCCCTCGAATAAACAATATAAGCTTTTGGCTTCTCCCCCCCTCTTTCCTACTCCTCTTGGCCTCTTCGGGTGTCGAAGCCGGGGCAGGAACGGGGTGGACCGTTTACCCCCCCTTAGCAGGAAATTTGGCCCACGCTGGGGCTTCAGTGGATCTAACAATTTTTTCTCTGCACTTGGCAGGAATCTCATCTATTTTAGGGGCAATCAACTTTATTACAACTATGATTAACATGAAGCCTCCCGCTGTCTCACAGTATCAGACACCCCTGTTTG
183	St965_Contig_1	Caulolatilus cyanops	Seawater	2012-02-23	00:49:00	20-36	26.01	-83.9967	96	USA: Gulf of Mexico	Multiple Opening/Closing Net Environmental Sensing Sytem (MOCNESS)	Fish eggs identified to mitochondrial barcoding gene (COI).	13	CATCCGAGCAGAACTCAGCCAACCAGGCGCCCTGCTCGGTGACGATCAAATTTACAATGTTATTGTTACTGCGCATGCCTTTGTAATAATCTTCTTCATAGTTATACCAATCATGATCGGAGGCTTCGGAAACTGACTAATCCCCCTAATAATCGGAGCCCCAGACATGGCATTCCCTCGAATAAACAACATAAGCTTCTGGCTCTTACCCCCCTCATTTTTACTGCTTCTGGCTTCCTCTGGAGTAGAAGCAGGAGCCGGGACAGGATGGACTGTTTACCCTCCCTTAGCGGGCAACCTAGCGCATGCTGGAGCATCTGTCGACCTAACCATCTTCTCCCTTCACCTGGCAGGGATTTCCTCAATTTTAGGAGCCATCAACTTCATCACAACCATTGT…
184	St965_Contig_2	Trachurus lathami	Seawater	2012-02-23	00:49:00	20-36	26.01	-83.9967	96	USA: Gulf of Mexico	Multiple Opening/Closing Net Environmental Sensing Sytem (MOCNESS)	Fish eggs identified to mitochondrial barcoding gene (COI).	6	GGAAAAACTAAGCCAACCTGGCGCCCTTCTAGGGGATGACCAAATTTACAACGTAATTGTTACGGCCCACGCTTTCGTAATAATTTTCTTTATAGTAATGCCAATTATGATTGGAGGCTTTGGAAACTGACTGATTCCGCTAATGATCGGGGCCCCTGATATAGCCTTCCCTCGAATGAATAACATGAGCTTCTGACTACTCCCTCCCTCCTTCCTCTTGCTTTTAGCCTCTTCAGGGGTTGAAGCCGGGGCCGGAACTGGTTGAACAGTCTATCCCCCACTGGCTGGGAACCTTGCCCACGCCGGAGCGTCCGTAGACTTAACCATCTTCTCCCTTCACCTAGCAGGGGTCTCGTCAATTCTAGGGGCTATTAATTTTATTACCACTATTATTAACAT…
185	St965_Contig_3	Saurida normani	Seawater	2012-02-23	00:49:00	20-36	26.01	-83.9967	96	USA: Gulf of Mexico	Multiple Opening/Closing Net Environmental Sensing Sytem (MOCNESS)	Fish eggs identified to mitochondrial barcoding gene (COI).	5	AAGCCTCCTAATTCGTGCTGAACTCAGCCAGCCAGGGGCCCTTCTTGGAGATGACCAAATTTATAACGTTATTGTTACTGCCCACGCGTTCGTTATAATTTTCTTTATAGTAATACCAATTATAATTGGGGGCTTCGGAAACTGACTCATCCCCCTTATAATTGGCGCCCCAGACATGGCATTTCCCCGCATGAATAACATAAGCTTCTGACTCCTGCCTCCTTCCTTCCTCCTCCTCCTCGCATCCTCAGGTGTAGAGGCTGGAGCCGGGACCGGATGGACCGTTTATCCACCCCTAGCGGGAAATCTAGCCCATGCCGGGGCATCGGTTGACCTAACCATTTTTTCTCTTCATCTGGCGGGAATTTCCTCAATTCTTGGGGCTATCAACTTTATTAC…
186	St965_Contig_4	Synodus poeyi	Seawater	2012-02-23	00:49:00	20-36	26.01	-83.9967	96	USA: Gulf of Mexico	Multiple Opening/Closing Net Environmental Sensing Sytem (MOCNESS)	Fish eggs identified to mitochondrial barcoding gene (COI).	5	CCTTTTAATCCGGGCAAAACTCAGCCGCCGGGGGCCCTTTTAGGGGACGACCAGATCTATAACGTTATCGTTACAGCCCATGCTTTTGTTATAATCTTTTTTATAGTGATACCAATTATAATCGGGGGATTCGGAAACTGGTTAATCCCCTTAATGATCGGCGCCCCAGATATGGCCTTCCCTCGAATAAACAATATAAGCTTTTGGCTTCTCCCCCCCTCTTTCCTACTCCTCTTGGCCTCTTCGGGTGTCGAAGCCGGGGCAGGAACGGGGTGGACCGTTTACCCCCCCTTAGCAGGAAATTTGGCCCACGCTGGGGCTTCAGTGGATCTAACAATTTTTTCTCTGCACTTGGCAGGAATCTCATCTATTTTAGGGGCAATCAACTTTATTACAACT…
187	St966-3	Caulolatilus cyanops	Seawater	2012-02-23	00:56:00	0-20	26.01	-83.9967	96	USA: Gulf of Mexico	Multiple Opening/Closing Net Environmental Sensing Sytem (MOCNESS)	Fish eggs identified to mitochondrial barcoding gene (COI).	1	TCGGTGACGATCAAATTTACATGTTATTGTTACTGCGCATGCCTTTGTAATAATCTTCTTCATAGTTATACCAATCATGATCGGAGGCTTCGGAAACTGACTAATCCCCCTAATAATCGGAGCCCCAGACATGGCATTCCCTCGAATAAACAACATAAGCTTCTGGCTCTTACCCCCCTCATTTTTACTGCTTCTGGCTTCCTCTGGAGTAGAAGCAGGAGCCGGGACAGGATGGACTGTTTACCCTCCCTTAGCGGGCAACCTAGCGCATGCTGGAGCATCTGTCGACCTAACCATCTTCTCCCTTCACCTGGCAGGGATTTCCTCAATTTTAGGAGCCATCAACTTCATCACAACCATTGTTAACATAAAACCACCAGCAACATCCCAGTATCAAAC…
188	St966-6	Prionotus stearnsi	Seawater	2012-02-23	00:56:00	0-20	26.01	-83.9967	96	USA: Gulf of Mexico	Multiple Opening/Closing Net Environmental Sensing Sytem (MOCNESS)	Fish eggs identified to mitochondrial barcoding gene (COI).	1	TTTTTGAGGGGTCGTTACGGCGCAGCTTTTGTAATAATCTTTTTTATAGTAATGCCTGTAATAATTGGGGGCTTTGGAAACTGACTTATTCCCCTAATGATCGGGGCCCCCGACATGGCCTTTCCTCGAATAAATAACATGAGCTTCTGACTTCTTCCCCCCTCCTTCCTACTCCTGCTTACATCCTCCGCCGTAGAAGCTGGGGCAGGCACAGGATGGACCGTCTATCCCCCCCTCGCCGGAAACCTCGCCCACGCAGGAGCCTCCGTGGACCTTGCAATTTTTTCACTCCATCTAGCAGGTATTTCTTCAATCTTAGGGGCCATTAACTTTATTACAACAATTTTTAATATAAAACCCCCTGCTATATCCCCCTACCAGATACCCCTCTTCGTCTGA…
189	St966-8	Mycteroperca phenax	Seawater	2012-02-23	00:56:00	0-20	26.01	-83.9967	96	USA: Gulf of Mexico	Multiple Opening/Closing Net Environmental Sensing Sytem (MOCNESS)	Fish eggs identified to mitochondrial barcoding gene (COI).	1	ATCAAATCTACAACGTAATTGTTACAGCACACGCCTTTGTAATAATTTTCTTTATAGTAATACCAATTATGATTGGTGGCTTTGGAAACTGACTCATCCCACTTATAATTGGTGCCCCCGATATAGCATTCCCTCGAATGAATAATATAAGCTTCTGACTTCTCCCCCCGTCTTTCCTTCTCCTTCTCGCCTCTTCTGGTGTAGAAGCCGGAGCTGGTACCGGTTGAACGGTATACCCTCCCTTAGCTGGAAACTTAGCCCATGCAGGGGCATCTGTAGACTTAACCATTTTCTCCCTACACTTAGCAGGGATCTCATCAATTCTGGGAGCAATTAACTTTATCACAACCATTGTTAATATGAAACCCCCAGCTATCTCTCAATATCAGACGCCTTTAT…
190	St966_Contig_1	Saurida normani	Seawater	2012-02-23	00:56:00	0-20	26.01	-83.9967	96	USA: Gulf of Mexico	Multiple Opening/Closing Net Environmental Sensing Sytem (MOCNESS)	Fish eggs identified to mitochondrial barcoding gene (COI).	3	TGCTGACTCAGCCGCCGGGGCCCTTCTTGGAGATGACCAAATTTATAACGTTATTGTTACTGCCCACGCGTTCGTTATAATTTTCTTTATAGTAATACCAATTATAATTGGGGGCTTCGGAAACTGACTCATCCCCCTTATAATTGGCGCCCCAGACATGGCATTTCCCCGCATGAATAACATAAGCTTCTGACTCCTGCCTCCTTCCTTCCTCCTCCTCCTCGCATCCTCAGGTGTAGAGGCTGGAGCCGGGACCGGATGGACCGTTTATCCGCCCCTAGCGGGAAATCTAGCCCATGCCGGGGCATCGGTTGACCTAACCATTTTTTCTCTTCATCTGGCGGGAATTTCCTCAATTCTTGGGGCTATCAACTTTATTACCACAATTATTAACATAAA…
191	St966_Contig_2	Prionotus stearnsi	Seawater	2012-02-23	00:56:00	0-20	26.01	-83.9967	96	USA: Gulf of Mexico	Multiple Opening/Closing Net Environmental Sensing Sytem (MOCNESS)	Fish eggs identified to mitochondrial barcoding gene (COI).	3	CCCCCTCCTAGGCAATGACAAACTTTACGACGGGTCGTTACGGCGCAGCTTTTGTAATAATCTTTTTTATAGTAATGCCTGTAATAATTGGAGGCTTTGGAAACTGACTTATTCCCCTAATGATCGGGGCCCCCGACATGGCCTTTCCTCGAATAAATAACATGAGCTTCTGACTTCTTCCCCCCTCCTTCCTACTCCTGCTTACATCCTCCGCCGTAGAAGCTGGGGCAGGCACAGGATGGACCGTCTATCCCCCTCTCGCCGGAAACCTCGCCCACGCAGGAGCCTCCGTGGACCTTGCAATTTTTTCACTCCATCTAGCAGGTATTTCTTCAATCTTAGGGGCCATTAACTTTATTACAACAATTTTTAATATAAAACCCCCTGCTATATCCCCCT…
192	St966_Contig_3	Trachurus lathami	Seawater	2012-02-23	00:56:00	0-20	26.01	-83.9967	96	USA: Gulf of Mexico	Multiple Opening/Closing Net Environmental Sensing Sytem (MOCNESS)	Fish eggs identified to mitochondrial barcoding gene (COI).	2	ACTAAGCCAACCTGGCGCCCTTCTAGGGGATGACCAAATTTACAACGTAATTGTTACGGCCCACGCTTTCGTAATAATTTTCTTTATAGTAATGCCAATTATGATTGGAGGCTTTGGAAACTGACTGATTCCGCTAATGATCGGGGCCCCTGATATAGCCTTCCCTCGAATGAATAACATGAGCTTCTGACTACTCCCTCCYTCCTTCCTCTTGCTTTTAGCCTCTTCAGGGGTTGAAGCCGGGGCCGGAACTGGTTGAACAGTCTATCCCCCACTGGCTGGGAACCTTGCCCACGCCGGAGCGTCCGTAGACTTAACCATCTTCTCCCTTCACCTAGCAGGGGTCTCGTCAATTCTAGGGGCTATTAATTTTATTACCACTATTATTAACATGAAACC…
